# Supplementary material for: Cancer-Drug Associations: A Complex System
Source: PLoS One. 2010 Apr 2;5(4):e10031. doi: 10.1371/journal.pone.0010031 (PMC2848862; doi:10.1371/journal.pone.0010031)
Supplement: Dataset S2 — Phase 1, 2, and 3 clinical drug trials for cancer, completed by 2009 (0.39 MB XLS) [file pone.0010031.s012.xls]

## Sheet: Sheet1
Conditions	Interventions	Phases	Start Date
Acquired Immunodeficiency Syndrome|HIV Infection	Drug: PCLUS 3-18 MN|Drug: PCLUS 6.1 MN	Phase I	1994
Acquired Immunodeficiency Syndrome|HIV Infection|skin cancer	Drug: Syngeneic Lymphocytes (CD4+) Cultured with OKT3 (Ortho) and Interleukin-2 (Chiro	Phase I	1996
Acquired Immunodeficiency Syndrome|HIV Infections	Drug: indinavir (MK-0639)	Phase I	1995
Actinic Keratosis	Drug: PEP005 Topical gel	Phase I	2008
leukemia|leukemia|myeloma|lymphoma|lymphoma|Waldenstrom's Macroglobulinemia	Drug: AVN-944 capsules foral administration	Phase I	2006
leukemia|Leukemia	Drug: Vincristine	Phase I	1998
leukemia	Drug: MLN518	Phase I	2005
leukemia|Myelodysplastic Syndrome	Drug: CT53518	Phase I	2002
leukemia	Drug: Busulfan|Drug: Cyclophosphamide|Drug: Mesna	Phase I	1991
leukemia (leukemia)|leukemia (leukemia)	Drug: 9-Aminocamptothecin (9-AC)	Phase I	1995
AdenoCancer	Drug: ING-1(heMAb)	Phase I	2002
Adrenocortical Cancer|Breast Cancer|Colorectal cancer|Prostate Cancer|Unspecified Adult Solid Tumor, Protocol Specific	Drug: doxorubicin hydrochloride|Drug: suramin	Phase I	1997
Gastrointestinal Malignancies|Solid Tumors	Drug: Oxaliplatin + Gemcitabine + Capecitabine	Phase I	2005
Malignancies	Drug: WX-UK1 in combination with Capecitabine	Phase I	2004
Solid Tumor	Drug: AZD2171|Drug: FOLFOX|Drug: Pemetrexed|Drug: Irinotecan (administered with & without Cetuximab)|Drug: Docetaxel	Phase I	2005
Solid Tumors	Drug: OSI-7904L|Drug: Cisplatin	Phase I	2003
Solid Tumors	Drug: E7389	Phase I	2003
Solid Tumors|Lymphoid Malignancies	Drug: RTA 402	Phase I	2006
Solid Tumors|Neoplasms	Drug: Ixabepilone|Drug: Capecitabine	Phase I	2005
Solid Tumors|lung cancer	Drug: sunitinib|Drug: docetaxel	Phase I	2004
leukemia|leukemia	Drug: Bexarotene	Phase I	2004
Anal Cancer|Cervical Cancer|esophagus cancer|Head and Neck Cancer|Penile Cancer|Vulvar Cancer	Drug: human papillomavirus 16 E7 peptide|Drug: synthetic human papillomavirus 16 E6 peptide	Phase I	1995
Anemia|Leukemia, T-Cell|Lymphocytosis|Neutropenia|Thrombocytopenia	Drug: cyclosporine	Phase I	1996
Aspergillosis|Candidiasis|Fungal Diseases|Mycoses	Drug: Voriconazole	Phase I	2000
Atypical Mycobacterium Infection	Drug: Interleukin-12	Phase I	1999
Lymphoma	Drug: IgG-RFB4-SMPT-dgA	Phase I	1991
Bladder Cancer	Drug: Ad5CMV-p53 gene	Phase I	1998
Bladder Cancer	Drug: gemcitabine hydrochloride	Phase I	2000
Bladder Cancer|Breast Cancer|Colorectal cancer|esophagus cancer|stomach cancer|Lung Cancer|Pancreatic Cancer	Drug: LM9 immunotoxin	Phase I	1998
Bladder Cancer|Breast Cancer|Colorectal cancer|stomach cancer|Head and Neck Cancer|Kidney Cancer|Leukemia|Lung Cancer|skin cancer (Skin)|Ovarian Cancer|Prostate Cancer|Unspecified Adult Solid Tumor, Protocol Specific	Drug: tanespimycin	Phase I	1999
Bladder Cancer|Breast Cancer|Colorectal cancer|Lung Cancer|Ovarian Cancer|Pancreatic Cancer	Drug: LM9 immunotoxin	Phase I	2000
Bladder Cancer|Breast Cancer|skin cancer (Skin)|Unspecified Adult Solid Tumor, Protocol Specific	Drug: decitabine	Phase I	2002
Bladder Cancer|Kidney Cancer|Lung Cancer	Drug: tucotuzumab celmoleukin	Phase I	2000
Bladder Neoplasms|Cancer, Transitional Cell	Drug: suramin	Phase I	1994
brain cancer	Drug: cladribine|Procedure: chemotherapy|Procedure: radiation therapy	Phase I	1995
brain cancer	Drug: hydroxyurea|Drug: pentoxifylline|Procedure: chemotherapy|Procedure: radiation therapy	Phase I	1995
brain cancer	Drug: ganciclovir|Procedure: chemotherapy|Procedure: conventional surgery|Procedure: gene therapy	Phase I	1996
brain cancer	Drug: carmustine|Procedure: conventional surgery	Phase I	1996
brain cancer	Drug: O6-benzylguanine	Phase I	1997
brain cancer	Drug: carmustine|Drug: irinotecan hydrochloride|Drug: polifeprosan 20 with carmustine implant|Procedure: surgical procedure	Phase I	1998
brain cancer	Drug: motexafin gadolinium|Procedure: magnetic resonance imaging|Procedure: surgical procedure	Phase I	1998
brain cancer	Drug: motexafin gadolinium|Procedure: radiation therapy	Phase I	1998
brain cancer	Drug: cyclosporine|Drug: etoposide|Drug: vincristine sulfate|Procedure: radiation therapy	Phase I	1998
brain cancer	Drug: Ad5CMV-p53 gene|Procedure: conventional surgery	Phase I	1999
brain cancer	Drug: iodine I 125|Drug: polifeprosan 20 with carmustine implant|Procedure: surgical procedure	Phase I	1999
brain cancer	Drug: motexafin gadolinium|Procedure: radiation therapy	Phase I	1999
brain cancer	Drug: motexafin gadolinium|Procedure: conventional surgery|Procedure: radiation therapy|Procedure: stereotactic radiosurgery	Phase I	1999
brain cancer	Drug: O6-benzylguanine|Drug: polifeprosan 20 with carmustine implant|Procedure: conventional surgery	Phase I	2000
brain cancer	Drug: irinotecan hydrochloride|Drug: temozolomide	Phase I	2000
brain cancer	Drug: bortezomib	Phase I	2001
brain cancer	Drug: gefitinib|Drug: temozolomide	Phase I	2002
brain cancer	Drug: karenitecin	Phase I	2002
brain cancer	Drug: lonafarnib	Phase I	2002
brain cancer	Drug: lenalidomide	Phase I	2002
brain cancer	Drug: motexafin gadolinium|Procedure: radiation therapy	Phase I	2002
brain cancer	Drug: atrasentan hydrochloride	Phase I	2002
brain cancer	Drug: iodine I 125|Procedure: adjuvant therapy	Phase I	2002
brain cancer	Drug: O6-benzylguanine|Drug: filgrastim|Drug: temozolomide	Phase I	2002
brain cancer	Drug: O6-benzylguanine|Drug: polifeprosan 20 with carmustine implant|Procedure: adjuvant therapy|Procedure: conventional surgery|Procedure: neoadjuvant therapy	Phase I	2003
brain cancer	Drug: cilengitide	Phase I	2003
brain cancer	Drug: CC-8490	Phase I	2003
brain cancer	Drug: L-alanosine	Phase I	2004
brain cancer	Drug: laromustine	Phase I	2005
brain cancer	Drug: EF5|Drug: fluorine F 18 EF5|Procedure: conventional surgery|Procedure: positron emission tomography	Phase I	2005
brain cancer	Drug: iodine I 131 monoclonal antibody TNT-1/B	Phase I	2005
brain cancer|Breast Cancer|Kidney Cancer|Lung Cancer|Lymphoma|skin cancer (Skin)|Ovarian Cancer|Smleukemia Intestine Cancer|Unspecified Adult Solid Tumor, Protocol Specific	Drug: carboxyamidotriazole|Drug: paclitaxel	Phase I	1994
brain cancer|Childhood Germ Cell Tumor|Colorectal cancer|Head and Neck Cancer|Kidney Cancer|Liver Cancer|Lymphoma|skin cancer (Skin)|Neuroblastoma|Sarcoma|Unspecified Childhood Solid Tumor, Protocol Specific	Drug: irinotecan hydrochloride|Drug: oxaliplatin	Phase I	2005
brain cancer|Childhood Germ Cell Tumor|Extragonadal Germ Cell Tumor|Kidney Cancer|Liver Cancer|Neuroblastoma|Ovarian Cancer|Sarcoma|Unspecified Childhood Solid Tumor, Protocol Specific	Drug: O6-benzylguanine|Drug: temozolomide	Phase I	2000
brain cancer|Childhood Germ Cell Tumor|Leukemia|Lymphoma|Cancer|eye cancer|Sarcoma	Drug: busulfan	Phase I	2000
brain cancer|Childhood Germ Cell Tumor|Neuroblastoma|Sarcoma	Drug: erlotinib hydrochloride|Drug: temozolomide	Phase I	2004
brain cancer|Chronic Myeloproliferative Disorders|Gastrointestinal Stromal Tumor|Leukemia|Lymphoma|myeloma and Plasma Cell Neoplasm|Myelodysplastic Syndromes|Myelodysplastic/Myeloproliferative Diseases|Precancerous/NonCondition|Smleukemia Intestine Cancer|Unspecified Adult Solid Tumor, Protocol Specific	Drug: imatinib mesylate	Phase I	2001
brain cancer|skin cancer|Lung Cancer|skin cancer (Skin)|Neuroblastoma|eye cancer|Sarcoma	Drug: iodine I 131 monoclonal antibody 3F8	Phase I	1997
brain cancer|Leukemia|Unspecified Childhood Solid Tumor, Protocol Specific	Drug: romidepsin	Phase I	2002
brain cancer|Lymphoma|Neuroblastoma|Sarcoma|Unspecified Childhood Solid Tumor, Protocol Specific	Drug: gleukemiaium nitrate	Phase I	1995
brain cancer|Lymphoma|Unspecified Adult Solid Tumor, Protocol Specific	Drug: O6-benzylguanine|Drug: carmustine|Drug: filgrastim|Drug: sargramostim|Drug: temozolomide|Drug: therapeutic autologous lymphocytes|Procedure: in vitro-treated peripheral blood stem cell transplantation	Phase I	1999
brain cancer|Lymphoma|Unspecified Childhood Solid Tumor, Protocol Specific	Drug: exatecan mesylate|Drug: filgrastim	Phase I	1999
brain cancer|Lymphoma|Unspecified Childhood Solid Tumor, Protocol Specific	Drug: ispinesib|Procedure: gene expression analysis|Procedure: immunohistochemistry staining method|Procedure: pharmacological study|Procedure: protein expression analysis	Phase I	2006
brain cancer|Neuroblastoma|Sarcoma	Drug: carboplatin|Drug: cisplatin|Drug: cyclophosphamide|Drug: etoposide|Drug: filgrastim|Drug: thiotepa|Drug: vincristine sulfate|Procedure: conventional surgery|Procedure: peripheral blood stem cell transplantation	Phase I	1998
Brain and Nervous System|Cancer	Drug: Irinotecan|Drug: Thalidomide	Phase I	2000
Brain Cancer	Drug: F-18 FLT	Phase I	2007
Brain Neoplasms	Drug: MPC-6827	Phase I	2005
Brain Neoplasms|brain cancer|Medulloblastoma	Drug: RMP-7 and carboplatin	Phase I	1996
Brain Neoplasms|Neuroblastoma	Drug: phenylbutyrate	Phase I	1996
Brain Tumor	Drug: ABT 510	Phase I	2003
Breast Cancer	Drug: BCG vaccine|Drug: CD80 breast cancer vaccine|Drug: sargramostim	Phase I	1996
Breast Cancer	Drug: filgrastim|Drug: indium In 111 monoclonal antibody BrE-3|Drug: yttrium Y 90 monoclonal antibody BrE-3|Procedure: autologous bone marrow transplantation|Procedure: peripheral blood stem cell transplantation	Phase I	1997
Breast Cancer	Drug: Paclitaxel|Drug: Vinorelbine|Drug: Filgrastim|Radiation: Radiation	Phase I	1999
Breast Cancer	Drug: Ad5CMV-p53 gene|Procedure: chemotherapy	Phase I	1999
Breast Cancer	Drug: filgrastim|Drug: yttrium Y 90 monoclonal antibody B3|Procedure: peripheral blood stem cell transplantation	Phase I	2001
Breast Cancer	Drug: alvocidib|Drug: trastuzumab	Phase I	2002
Breast Cancer	Drug: indole-3-carbinol	Phase I	2002
Breast Cancer	Drug: celecoxib 400 mg BID	Phase I	2003
Breast Cancer	Drug: celecoxib 400 mg bid	Phase I	2003
Breast Cancer	Drug: tamoxifen citrate	Phase I	2003
Breast Cancer	Drug: HER-2/neu peptide vaccine	Phase I	2003
Breast Cancer	Drug: recombinant vaccinia-MUC-1 vaccine|Drug: recombinant vaccinia-TRICOM vaccine|Drug: sargramostim	Phase I	2003
Breast Cancer	Drug: Doxorubicin	Phase I	2004
Breast Cancer	Drug: monoclonal antibody HuHMFG1	Phase I	2004
Breast Cancer	Drug: lapatinib	Phase I	2004
Breast Cancer	Drug: Abraxane	Phase I	2005
Breast Cancer|Breast Neoplasm	Drug: 9-cis-Retinoic Acid	Phase I	1996
Breast Cancer|Breast Neoplasms	Drug: fenretinide	Phase I	1994
Breast Cancer|Cancer|kidney cancer|Lymphoma|Ovarian Cancer	Drug: PSC 833|Drug: paclitaxel	Phase I	1994
Breast Cancer|Cancer|Lung Cancer|Ovarian Cancer	Drug: Vinorelbine|Drug: XR9576	Phase I	1999
Breast Cancer|Chronic Myeloproliferative Disorders|Gestational Trophoblastic Tumor|Kidney Cancer|Leukemia|Lymphoma|myeloma and Plasma Cell Neoplasm|Myelodysplastic Syndromes|Neuroblastoma|Ovarian Cancer|Testicular cancer	Drug: recombinant interleukin-12	Phase I	1997
Breast Cancer|Colorectal cancer|Gleukemiabladder Cancer|stomach cancer|Head and Neck Cancer|Liver Cancer|Ovarian Cancer|Pancreatic Cancer|Testicular cancer	Drug: CMV pp65 peptide|Drug: recombinant fowlpox-CEA(6D)/TRICOM vaccine|Drug: tetanus toxoid|Drug: therapeutic autologous dendritic cells	Phase I	2002
Breast Cancer|Colorectal cancer|Gleukemiabladder Cancer|stomach cancer|Head and Neck Cancer|Liver Cancer|Ovarian Cancer|Pancreatic Cancer|Testicular cancer	Drug: recombinant fowlpox GM-CSF vaccine adjuvant|Drug: recombinant fowlpox-CEA(6D)/TRICOM vaccine|Drug: sargramostim	Phase I	2002
Breast Cancer|Endometrial Cancer	Drug: genistein|Procedure: preventative dietary intervention	Phase I	2004
Breast Cancer|Head and Neck Cancer|Lung Cancer|Ovarian Cancer|Unspecified Adult Solid Tumor, Protocol Specific	Drug: docetaxel	Phase I	1996
Breast Cancer|Head and Neck Cancer|Lymphoma|Cancer|Non-skin cancertous Skin Cancer|Sarcoma	Drug: silicon phthalocyanine 4	Phase I	2001
Breast Cancer|skin cancer|Kidney Cancer|Lymphoma|skin cancer (Skin)|myeloma and Plasma Cell Neoplasm|Sarcoma|Unspecified Adult Solid Tumor, Protocol Specific	Drug: recombinant interferon alpha-1b	Phase I	2001
Breast Cancer|Kidney Cancer|Lung Cancer	Drug: interleukin-4 PE38KDEL cytotoxin	Phase I	2002
Breast Cancer|Kidney Cancer|Lung Cancer|skin cancer (Skin)|Testicular cancer	Drug: busulfan|Drug: cyclophosphamide|Drug: etoposide|Drug: fludarabine phosphate|Procedure: peripheral blood stem cell transplantation|Procedure: radiation therapy	Phase I	1999
Breast Cancer|Kidney Neoplasm|Lymphoma|Neoplasm Metastasis|Ovarian Cancer	Drug: PSC 833	Phase I	1992
Breast Cancer|Lung Cancer|Ovarian Cancer	Drug: HER-2/neu peptide vaccine|Drug: sargramostim	Phase I	1999
Breast Cancer|Lymphoma|Neoplasm|Prostatic Neoplasm	Drug: 7-hydroxystaurosporine (UCN-01)	Phase I	1995
Breast Cancer|Cancer	Drug: aldesleukin|Drug: paclitaxel|Drug: therapeutic tuminfiltrating lymphocytes|Drug: trastuzumab|Procedure: conventional surgery	Phase I	2005
Breast Cancer|Neoplasms	Drug: SU011248; Capecitabine	Phase I	2005
Breast Cancer|lung cancer|skin cancer|Colorectal cancer|Pancreatic Cancer|Prostate AdenoCancer|brain cancer|Primary Solid Tumors	Drug: 131-I-TM-601 (chlorotoxin)	Phase I	2006
Breast Cancer|Ovarian Cancer|Unspecified Adult Solid Tumor, Protocol Specific	Drug: ixabepilone	Phase I	2000
Breast Neoplasm|Pancreatic Neoplasm|Lung Neoplasm|Ovarian Neoplasm|Renal Neoplasm	Drug: TAK-165	Phase I	2002
Breast Neoplasms	Drug: HKI-272	Phase I	2003
Breast Neoplasms	Drug: SU011248|Drug: Paclitaxel	Phase I	2005
Breast Neoplasms|Lymphoma|Neoplasm Metastasis|Testicular Neoplasms	Drug: interleukin-1	Phase I	1991
Breast Neoplasms|Neoplasm Metastasis	Drug: IL-3	Phase I	1991
Cancer	Drug: Genistein	Phase I	1998
Cancer	Drug: Irinotecan	Phase I	1998
Cancer	Drug: recombinant interleukin-12	Phase I	1998
Cancer	Drug: floxuridine|Drug: leucovorin calcium|Drug: oxaliplatin	Phase I	2000
Cancer	Drug: tipifarnib|Drug: trastuzumab	Phase I	2000
Cancer	Drug: entinostat	Phase I	2001
Cancer	Drug: vorinostat	Phase I	2001
Cancer	Drug: E7389	Phase I	2003
Cancer	Drug: ARQ 501	Phase I	2003
Cancer	Drug: S CKD602	Phase I	2003
Cancer	Drug: AEE788	Phase I	2003
Cancer	Drug: PV701	Phase I	2003
Cancer	Drug: forodesine hydrochloride	Phase I	2003
Cancer	Drug: XL647	Phase I	2004
Cancer	Drug: GW786034|Drug: lapatinib	Phase I	2004
Cancer	Drug: vinflunine + ketaconazole	Phase I	2005
Cancer	Drug: EM-1421	Phase I	2005
Cancer	Drug: XL820	Phase I	2005
Cancer	Drug: GW572016 oral tablets	Phase I	2005
Cancer	Drug: vinflunine + ixabepilone	Phase I	2006
Cancer	Drug: EC145, Injection	Phase I	2006
Cancer	Drug: XL820	Phase I	2006
Cancer	Drug: Docetaxel|Drug: Casopitant	Phase I	2007
Cancer	Drug: GSK786034	Phase I	2007
Cancer of Kidney|Kidney Cancer|Renal Cancer|Neoplasms, Kidney|Renal Neoplasms	Drug: 124-Iodine-cG250 (124I-cG250)	Phase I	2005
Cancer|Cancer	Drug: liposomal doxorubicin and docetaxel	Phase I	2000
Cancer|Graft-Versus-Host Disease	Drug: MEDI-507|Drug: MEDI-507	Phase I	1998
Cancer|Metastases	Drug: panHer	Phase I	2004
Cancer|Neoplasm|Neoplasm Metastasis	Drug: VNP20009	Phase I	2000
Cancer|Refractory Solid Tumor	Drug: Cetuximab + Irinotecan	Phase I	2005
Cancer|Solid TumCancer|Malignancy	Drug: topotecan	Phase I	2006
Cancer-Related Problem/Condition|Colorectal cancer	Drug: celecoxib|Drug: irinotecan hydrochloride	Phase I	2005
Cancer-Related Problem/Condition|Head and Neck Cancer|Lung Cancer|Ovarian Cancer	Drug: cisplatin|Drug: dimesna|Drug: paclitaxel	Phase I	1998
Cancer-Related Problem/Condition|Kidney Cancer	Drug: Biomed 101|Drug: aldesleukin|Procedure: Biomed 101/interleukin-2	Phase I	2000
Cancer-Related Problem/Condition|Leukemia	Drug: carboplatin|Drug: filgrastim|Drug: topotecan hydrochloride	Phase I	1995
Cancer-Related Problem/Condition|Leukemia	Drug: amifostine trihydrate|Drug: cytarabine|Drug: idarubicin	Phase I	1998
Cancer-Related Problem/Condition|Leukemia|Lymphoma|myeloma and Plasma Cell Neoplasm	Drug: cytarabine|Drug: deoxycytidine	Phase I	1995
Cancer-Related Problem/Condition|Lymphoma|Smleukemia Intestine Cancer|Unspecified Adult Solid Tumor, Protocol Specific	Drug: cyclosporine|Drug: irinotecan hydrochloride|Drug: phenobarbital	Phase I	1996
Cancer-Related Problem/Condition|Unspecified Adult Solid Tumor, Protocol Specific	Drug: adenosine triphosphate|Procedure: quality-of-life assessment	Phase I	2000
Cancer-Related Problem/Condition|Unspecified Childhood Solid Tumor, Protocol Specific	Drug: cyclophosphamide|Drug: dexrazoxane hydrochloride|Drug: doxorubicin hydrochloride|Drug: filgrastim|Drug: oblimersen	Phase I	2002
Cancer	Drug: ARQ 501	Phase I	2004
Cancer of the Appendix|Colorectal cancer|Smleukemia Intestine Cancer	Drug: capecitabine|Drug: oxaliplatin	Phase I	1999
lung cancer	Drug: CI 1033|Drug: PACLITAXEL|Drug: CARBOPLATIN	Phase I	2002
lung cancer	Drug: ABR-217620|Drug: docetaxel	Phase I	2005
lung cancer	Drug: bevacizumab with chemotherapy, Pleur-XTM catheter placement	Phase I	2005
lung cancer|Neoplasm Metastasis	Drug: Cetuximab	Phase I	2005
Cancer|Peritoneal Neoplasm	Drug: Cisplatin|Drug: Paclitaxel|Drug: 5-FU	Phase I	1997
Cervical Cancer	Drug: human papillomavirus 16 E7 peptide|Procedure: in vitro-treated peripheral blood stem cell transplantation	Phase I	1999
Cervical Cancer	Drug: Topotecan|Drug: Cisplatin	Phase I	2002
Cervical Cancer	Drug: cisplatin|Drug: gemcitabine hydrochloride|Procedure: brachytherapy|Procedure: radiation therapy	Phase I	2003
Cervical Cancer|Endometrial Cancer|Ovarian Cancer|Vaginal Cancer	Drug: capecitabine|Procedure: brachytherapy|Procedure: radiation therapy	Phase I	2005
Cervical Cancer|Fleukemiaopian Tube Cancer|Head and Neck Cancer|Lung Cancer|Mesothelioma|Ovarian Cancer|Pancreatic Cancer|Peritoneal Cavity Cancer	Drug: SS1(dsFv)-PE38 immunotoxin	Phase I	2000
Cervical Cancer|Fleukemiaopian Tube Cancer|Head and Neck Cancer|Lung Cancer|Mesothelioma|Ovarian Cancer|Pancreatic Cancer|Peritoneal Cavity Cancer	Drug: SS1(dsFv)-PE38 immunotoxin	Phase I	2003
Cervical Cancer|Precancerous/NonCondition	Drug: motexafin lutetium	Phase I	2000
Childhood Germ Cell Tumor|Extragonadal Germ Cell Tumor	Drug: bleomycin|Drug: cisplatin|Drug: cyclophosphamide|Drug: etoposide|Drug: filgrastim|Procedure: adjuvant therapy|Procedure: conventional surgery	Phase I	2004
Childhood sarcoma|Childhood Liver Cancer|Bone Cancer|Brain Tumor|Kidney Tumor	Drug: doxorubicin HCl liposome	Phase I	1999
leukemia	Drug: CP-461	Phase I	2002
leukemia	Drug: IDEC-152	Phase I	2002
leukemia	Drug: GX15-070MS|Drug: GX15-070MS	Phase I	2004
leukemia	Drug: lonafarnib (SCH66336)|Drug: imatinib mesylate (Gleevec)	Phase I	2002
Chronic Myeloproliferative Disorders|Gastrointestinal Stromal Tumor|Leukemia|Lymphoma|myeloma and Plasma Cell Neoplasm|Myelodysplastic Syndromes|Myelodysplastic/Myeloproliferative Diseases|Precancerous/NonCondition|Smleukemia Intestine Cancer|Unspecified Adult Solid Tumor, Protocol Specific	Drug: imatinib mesylate	Phase I	2001
Chronic Myeloproliferative Disorders|Graft Versus Host Disease|Leukemia|Lymphoma|myeloma and Plasma Cell Neoplasm|Myelodysplastic Syndromes|Myelodysplastic/Myeloproliferative Diseases	Drug: cyclophosphamide|Drug: filgrastim|Drug: fludarabine phosphate|Drug: mycophenolate mofetil|Drug: tacrolimus|Procedure: leukemiaogeneic bone marrow transplantation|Procedure: peripheral blood stem cell transplantation|Procedure: radiation therapy	Phase I	2002
Chronic Myeloproliferative Disorders|Graft Versus Host Disease|Leukemia|Lymphoma|myeloma and Plasma Cell Neoplasm|Myelodysplastic Syndromes|Precancerous/NonCondition	Drug: cyclosporine|Drug: filgrastim|Drug: methylprednisolone|Drug: prednisone|Procedure: leukemiaogeneic bone marrow transplantation|Procedure: peripheral blood stem cell transplantation	Phase I	1999
Chronic Myeloproliferative Disorders|Graft Versus Host Disease|Leukemia|Lymphoma|myeloma and Plasma Cell Neoplasm|Myelodysplastic Syndromes|Precancerous/NonCondition|Smleukemia Intestine Cancer	Drug: anti-thymocyte globulin|Drug: cladribine|Drug: cyclophosphamide|Drug: etoposide|Drug: filgrastim|Drug: methylprednisolone|Drug: tacrolimus|Procedure: leukemiaogeneic bone marrow transplantation|Procedure: in vitro-treated peripheral blood stem cell transplantation	Phase I	1999
Chronic Myeloproliferative Disorders|Leukemia|Lymphoma|myeloma and Plasma Cell Neoplasm|Myelodysplastic Syndromes	Drug: tipifarnib	Phase I	2000
Chronic Myeloproliferative Disorders|Leukemia|Lymphoma|myeloma and Plasma Cell Neoplasm|Myelodysplastic Syndromes|Myelodysplastic/Myeloproliferative Diseases|Precancerous/NonCondition	Drug: tetradecanoylphorbol acetate	Phase I	1998
Chronic Myeloproliferative Disorders|Leukemia|Lymphoma|myeloma and Plasma Cell Neoplasm|Myelodysplastic Syndromes|Precancerous/NonCondition|Smleukemia Intestine Cancer|Unspecified Adult Solid Tumor, Protocol Specific	Drug: pyroxamide	Phase I	2002
Chronic Myeloproliferative Disorders|Leukemia|Lymphoma|myeloma and Plasma Cell Neoplasm|Myelodysplastic Syndromes|Precancerous/NonCondition|Unspecified Adult Solid Tumor, Protocol Specific	Drug: decitabine	Phase I	1997
Chronic Myeloproliferative Disorders|Leukemia|Lymphoma|Myelodysplastic Syndromes|Myelodysplastic/Myeloproliferative Diseases	Drug: alemtuzumab|Drug: fludarabine phosphate|Drug: melphalan|Drug: tacrolimus|Drug: therapeutic leukemiaogeneic lymphocytes|Drug: thiotepa|Procedure: peripheral blood stem cell transplantation	Phase I	2005
Chronic Myeloproliferative Disorders|Leukemia|Myelodysplastic Syndromes|Myelodysplastic/Myeloproliferative Diseases	Drug: decitabine|Drug: romidepsin	Phase I	2005
Colorectal cancer	Drug: fluorouracil|Drug: raltitrexed	Phase I	1995
Colorectal cancer	Drug: monoclonal antibody Hu3S193	Phase I	2000
Colorectal cancer	Drug: iodine I 131 monoclonal antibody CC49-deltaCH2	Phase I	2001
Colorectal cancer	Drug: fluorouracil|Drug: gefitinib|Drug: irinotecan hydrochloride|Drug: leucovorin calcium	Phase I	2001
Colorectal cancer	Drug: curcumin	Phase I	2001
Colorectal cancer	Drug: Erlotinib (aka Tarceva OSI-774)|Drug: Bevacizumab (aka Avastin Rhu MAb VEGF)	Phase I	2002
Colorectal cancer	Drug: bevacizumab|Drug: erlotinib hydrochloride|Drug: fluorouracil|Drug: leucovorin calcium|Drug: oxaliplatin	Phase I	2003
Colorectal cancer	Drug: nitric oxide-releasing acetylsalicylic acid derivative|Procedure: biopsy|Procedure: laboratory biomarker analysis	Phase I	2006
Colorectal cancer	Drug: KRN330	Phase I	2007
Colorectal cancer|esophagus cancer|stomach cancer|Pancreatic Cancer	Drug: iodine I 131 monoclonal antibody CC49-deltaCH2	Phase I	2001
Colorectal cancer|Head and Neck Cancer|Kidney Cancer|Lung Cancer|Pancreatic Cancer	Drug: bevacizumab|Drug: cetuximab|Drug: erlotinib hydrochloride	Phase I	2005
Colorectal cancer|Lung Cancer|Breast Cancer|Head and Neck Cancer|Prostate Cancer	Drug: DAVANAT|Drug: 5-fluorouracil	Phase I	2003
Colorectal cancer|Cancer	Drug: recombinant flt3 ligand	Phase I	1998
Colorectal cancer|Cancer	Drug: iodine I 131 monoclonal antibody F19|Procedure: conventional surgery|Procedure: neoadjuvant therapy|Procedure: radionuclide imaging	Phase I	1999
Colorectal cancer|Cancer	Drug: lonafarnib|Procedure: conventional surgery	Phase I	2000
Colorectal cancer|Precancerous/NonCondition	Drug: celecoxib|Drug: placebo	Phase I	2002
Colorectal Neoplasm|Hereditary Nonpolyposis	Drug: Celecoxib (SC-58635)	Phase I	1998
Colorectal Neoplasm|Liver Neoplasm|Neoplasm Metastasis	Drug: Melphalan|Drug: Floxuridine|Drug: Leucovorin	Phase I	1997
Crohn Disease	Drug: UVADEX and UVAR XTS Photopheresis System	Phase I	2003
Epithelial Ovarian Cancer	Drug: MORA003	Phase I	2005
esophagus cancer	Drug: fluorouracil|Drug: oxaliplatin|Procedure: conventional surgery|Procedure: radiation therapy	Phase I	2000
esophagus cancer	Drug: capecitabine|Drug: carboplatin|Drug: paclitaxel|Procedure: radiation therapy	Phase I	2003
esophagus cancer|stomach cancer	Drug: cisplatin|Drug: irinotecan hydrochloride|Procedure: radiation therapy	Phase I	1999
esophagus cancer|Lung Cancer|Lymphoma	Drug: topotecan hydrochloride|Procedure: low-LET electron therapy|Procedure: low-LET photon therapy	Phase I	1995
esophagus cancer|Lung Cancer|Mesothelioma|Cancer	Drug: decitabine	Phase I	1999
Extragonadal Germ Cell Tumor|Ovarian Cancer|Testicular cancer	Drug: carboplatin|Drug: etoposide|Drug: filgrastim|Drug: ifosfamide|Drug: paclitaxel|Procedure: peripheral blood stem cell transplantation	Phase I	1994
Extrahepatic Bile Duct Cancer|Gleukemiabladder Cancer|Pancreatic Cancer	Drug: motexafin gadolinium|Procedure: radiation therapy	Phase I	1998
Fleukemiaopian Tube Cancer|Cancer|Ovarian Cancer|Peritoneal Cavity Cancer	Drug: recombinant adenovirus-p53 SCH-58500	Phase I	1997
Fleukemiaopian Tube Cancer|Ovarian Cancer|Peritoneal Cavity Cancer	Drug: carboplatin|Drug: cyclophosphamide|Drug: filgrastim|Procedure: autologous bone marrow transplantation|Procedure: peripheral blood stem cell transplantation	Phase I	1994
Fleukemiaopian Tube Cancer|Ovarian Cancer|Peritoneal Cavity Cancer	Drug: etoposide|Drug: pegylated liposomal doxorubicin hydrochloride	Phase I	1998
Fleukemiaopian Tube Cancer|Ovarian Cancer|Peritoneal Cavity Cancer	Drug: filgrastim|Drug: gemcitabine hydrochloride|Drug: topotecan hydrochloride	Phase I	1998
Fleukemiaopian Tube Cancer|Ovarian Cancer|Peritoneal Cavity Cancer	Drug: carboplatin|Drug: paclitaxel|Drug: pegylated liposomal doxorubicin hydrochloride	Phase I	1999
Fleukemiaopian Tube Cancer|Ovarian Cancer|Peritoneal Cavity Cancer	Drug: etoposide|Drug: topotecan hydrochloride	Phase I	1999
Fleukemiaopian Tube Cancer|Ovarian Cancer|Peritoneal Cavity Cancer	Drug: bortezomib|Drug: carboplatin	Phase I	2001
Fleukemiaopian Tube Cancer|Ovarian Cancer|Peritoneal Cavity Cancer	Drug: topotecan hydrochloride|Procedure: adjuvant therapy	Phase I	2002
Fleukemiaopian Tube Cancer|Ovarian Cancer|Peritoneal Cavity Cancer	Drug: topotecan hydrochloride	Phase I	2004
Fleukemiaopian Tube Neoplasm|Ovarian Cancer|Peritoneal Neoplasm	Drug: SU5416 and carboplatin	Phase I	2000
Fever|Mycoses|Neutropenia	Drug: FK463	Phase I	1998
Fibroid	Drug: PRA-027	Phase I	2007
Focal Glomerulosclerosis	Drug: Rosiglitazone (Avandia)|Drug: Adalimumab (Humira)	Phase I	2005
stomach cancer|Pancreatic Cancer	Drug: cisplatin|Drug: gemcitabine hydrochloride|Procedure: radiation therapy	Phase I	1998
Gastrointestinal Neoplasms|Pancreatic Neoplasms	Drug: gemcitabine	Phase I	1995
Gastrointestinal Stromal Tumors	Drug: AMN107, STI571	Phase I	2005
brain cancer|brain cancers	Drug: CC-8490	Phase I	2003
brain cancer	Drug: RTA 744|Drug: RTA 744 injection	Phase I	2005
brain cancer|Sarcoma	Drug: SU101	Phase I	1997
Glomerulonephritis|Lupus Nephritis|Systemic Lupus Erythematosus	Drug: SQ Fludarabine	Phase I	1998
Head and Neck Cancer	Drug: azacitidine|Drug: iodine I 131|Drug: liothyronine sodium	Phase I	1999
Head and Neck Cancer	Drug: paclitaxel|Drug: semaxanib	Phase I	2000
Head and Neck Cancer	Drug: capecitabine|Drug: carboplatin|Procedure: conventional surgery|Procedure: radiation therapy	Phase I	2003
Head and Neck Cancer	Drug: anti-CD45 monoclonal antibody|Drug: autologous Epstein-Barr virus-specific cytotoxic T lymphocytes	Phase I	2003
Head and Neck Cancer	Drug: cisplatin|Drug: cytochlor|Drug: tetrahydrouridine|Procedure: radiation therapy	Phase I	2004
Head and Neck Cancer	Drug: fenretinide|Drug: lonafarnib	Phase I	2005
Head and Neck Cancer|skin cancer	Drug: ZD-1839|Drug: Cisplatin	Phase I	2002
Head and Neck Cancer|Cancer	Drug: recombinant fowlpox-TRICOM vaccine	Phase I	2001
Head and Neck Neoplasm|skin cancer	Drug: paclitaxel concurrent with radiation therapy	Phase I	1995
Head and Neck Neoplasms	Drug: Tetra-O-Methyl Nordihydroguaiaretic Acid (M4N EM-1421)	Phase I	2003
Healthy	Drug: HKI-272	Phase I	2006
Hematologic Neoplasm|HIV Infection	Drug: GCSF Mobilized leukemiaogeneic PBSC Cultured w/Cytokines; Transduced w/RV	Phase I	1999
Hematologic Neoplasms|Neoplasms	Drug: CRA-24781	Phase I	2005
Hematological Malignancies	Drug: Obatoclax mesylate (GX15-070MS)	Phase I	2005
Hematological Malignancies|Leukemia|Lymphoma|Unresectable Solid Tumors	Drug: STA-5312	Phase I	2004
Hippel-Lindau Disease	Drug: EYE001	Phase I	2003
HIV Infection	Drug: Hydroxyurea	Phase I	1999
HIV Infection	Drug: Capravirine	Phase I	2000
HIV Infection	Drug: Tenofovir DF	Phase I	2001
HIV Infections	Drug: HAART	Phase I	2002
HIV Infections	Drug: Leflunomide	Phase I	2005
IgA Deficiency	Drug: Lymphocyte Stimulat(BLyS)	Phase I	2001
skin cancer|skin cancer (Skin)	Drug: MART-1 antigen|Drug: gp100 antigen|Drug: incomplete Freund's adjuvant|Drug: progenipoietin|Drug: tyrosinase peptide	Phase I	2000
skin cancer|skin cancer (Skin)	Drug: MART-1 antigen|Drug: gp100 antigen|Drug: incomplete Freund's adjuvant|Drug: ipilimumab|Drug: tyrosinase peptide|Procedure: adjuvant therapy	Phase I	2001
Kidney Cancer	Drug: recombinant interferon alfa|Drug: temsirolimus	Phase I	2002
Kidney Cancer|skin cancer (Skin)	Drug: aldesleukin|Drug: bryostatin 1	Phase I	2000
Kidney Cancer|skin cancer (Skin)	Drug: recombinant CD40-ligand|Drug: recombinant flt3 ligand	Phase I	2001
Kidney Disease|Neoplasm|Neoplasm Metastasis	Drug: Oxaliplatin	Phase I	1999
Kidney Diseases	Drug: carboxypeptidase-G2	Phase I	1992
Kidney Neoplasms|Neoplasm Metastasis	Drug: PSC 833|Drug: vinblastine	Phase I	1997
Leptomeningeal Cancertosis	Drug: RTA 744	Phase I	2006
Leukemia	Drug: etoposide|Drug: topotecan hydrochloride	Phase I	1994
Leukemia	Drug: monoclonal antibody Mik-beta-1	Phase I	1996
Leukemia	Drug: topotecan hydrochloride	Phase I	1996
Leukemia	Drug: etoposide|Drug: mitoxantrone hydrochloride|Drug: valspodar	Phase I	1997
Leukemia	Drug: bryostatin 1|Drug: cladribine	Phase I	1998
Leukemia	Drug: raltitrexed	Phase I	1998
Leukemia	Drug: BL22 immunotoxin	Phase I	1998
Leukemia	Drug: tipifarnib	Phase I	1999
Leukemia	Drug: cytarabine|Drug: filgrastim|Drug: fludarabine phosphate|Drug: oblimersen	Phase I	1999
Leukemia	Drug: tipifarnib	Phase I	2001
Leukemia	Drug: decitabine	Phase I	2003
Leukemia	Drug: alvocidib|Drug: imatinib mesylate	Phase I	2003
Leukemia	Drug: imatinib mesylate|Drug: tanespimycin	Phase I	2003
Leukemia	Drug: cytarabine|Drug: triapine	Phase I	2003
Leukemia	Drug: bortezomib	Phase I	2004
Leukemia	Drug: temozolomide	Phase I	2004
Leukemia	Drug: laromustine|Drug: temozolomide	Phase I	2004
Leukemia	Drug: tanespimycin	Phase I	2004
Leukemia	Drug: filgrastim	Phase I	2005
Leukemia	Drug: rituximab|Drug: tanespimycin	Phase I	2005
Leukemia	Drug: dasatinib	Phase I	2005
Leukemia, T-Cell|Lymphoma, T-Cell, Cutaneous	Drug: Yttrium-90 radiolabeled anti-Tac antibody	Phase I	1989
Leukemia|Lymphoma	Drug: LM2 immunotoxin	Phase I	1996
Leukemia|Lymphoma	Drug: leukemiaogeneic Epstein-Barr virus-specific cytotoxic T lymphocytes	Phase I	1996
Leukemia|Lymphoma	Drug: bryostatin 1|Drug: cytarabine	Phase I	1997
Leukemia|Lymphoma	Drug: bryostatin 1|Drug: fludarabine phosphate	Phase I	1998
Leukemia|Lymphoma	Drug: 7-hydroxystaurosporine|Drug: fludarabine phosphate	Phase I	1999
Leukemia|Lymphoma	Drug: arsenic trioxide	Phase I	2000
Leukemia|Lymphoma	Drug: apolizumab	Phase I	2001
Leukemia|Lymphoma	Drug: apolizumab|Drug: rituximab	Phase I	2001
Leukemia|Lymphoma	Drug: romidepsin	Phase I	2002
Leukemia|Lymphoma	Drug: LM2 immunotoxin	Phase I	2004
Leukemia|Lymphoma|Meningeal Neoplasms	Drug: topotecan	Phase I	1993
Leukemia|Lymphoma|myeloma and Plasma Cell Neoplasm	Drug: aldesleukin	Phase I	1998
Leukemia|Lymphoma|myeloma and Plasma Cell Neoplasm	Drug: arsenic trioxide	Phase I	1998
Leukemia|Lymphoma|myeloma and Plasma Cell Neoplasm|Myelodysplastic Syndromes	Drug: bortezomib	Phase I	2000
Leukemia|Lymphoma|Myelodysplastic Syndromes|Myelodysplastic/Myeloproliferative Diseases	Drug: aldesleukin|Drug: cyclophosphamide|Drug: etoposide|Drug: filgrastim|Drug: pegylated liposomal doxorubicin hydrochloride|Drug: therapeutic leukemiaogeneic lymphocytes	Phase I	1998
Leukemia|Lymphoma|Myelodysplastic Syndromes|Myelodysplastic/Myeloproliferative Diseases	Drug: cyclophosphamide|Procedure: leukemiaogeneic bone marrow transplantation|Procedure: peripheral blood stem cell transplantation|Procedure: radiation therapy	Phase I	2003
Leukemia|Lymphoma|Myelodysplastic Syndromes|Myelodysplastic/Myeloproliferative Diseases|Unspecified Adult Solid Tumor, Protocol Specific	Drug: perifosine	Phase I	1999
Leukemia|Lymphoma|Precancerous/NonCondition|Smleukemia Intestine Cancer	Drug: arginine butyrate|Drug: ganciclovir	Phase I	1994
Leukemia|Lymphoma|Smleukemia Intestine Cancer	Drug: bortezomib|Drug: tanespimycin	Phase I	2005
Leukemia|Lymphoma|Unspecified Adult Solid Tumor, Protocol Specific	Drug: 7-hydroxystaurosporine	Phase I	1998
Leukemia|Lymphoma|Unspecified Adult Solid Tumor, Protocol Specific	Drug: ABT-888|Procedure: biopsy|Procedure: pharmacological study	Phase I	2006
Leukemia|myeloma and Plasma Cell Neoplasm|Myelodysplastic Syndromes|Myelodysplastic/Myeloproliferative Diseases	Drug: entinostat	Phase I	2001
Leukemia|Myelodysplastic Syndromes	Drug: aldesleukin|Drug: cytarabine|Drug: etoposide|Drug: mitoxantrone hydrochloride|Drug: therapeutic leukemiaogeneic lymphocytes|Drug: therapeutic autologous lymphocytes|Procedure: leukemiaogeneic bone marrow transplantation|Procedure: peripheral blood stem cell transplantation	Phase I	1998
Leukemia|Myelodysplastic Syndromes	Drug: exatecan mesylate	Phase I	1999
Leukemia|Myelodysplastic Syndromes	Drug: irofulven	Phase I	1999
Leukemia|Myelodysplastic Syndromes	Drug: bortezomib	Phase I	2000
Leukemia|Myelodysplastic Syndromes	Drug: BMS-214662	Phase I	2000
Leukemia|Myelodysplastic Syndromes	Drug: tipifarnib	Phase I	2000
Leukemia|Myelodysplastic Syndromes	Drug: asparaginase|Drug: cytarabine|Drug: gemtuzumab ozogamicin|Drug: mitoxantrone hydrochloride	Phase I	2002
Leukemia|Myelodysplastic Syndromes	Drug: cytarabine|Drug: laromustine	Phase I	2003
Leukemia|Myelodysplastic Syndromes	Drug: becatecarin	Phase I	2004
Leukemia|Myelodysplastic Syndromes	Drug: R(+)XK469	Phase I	2004
Leukemia|Myelodysplastic Syndromes	Drug: MGCD0103	Phase I	2005
Leukemia|Myelodysplastic Syndromes	Drug: MGCD0103	Phase I	2005
Leukemia|Myelodysplastic Syndromes|Myelodysplastic/Myeloproliferative Diseases	Drug: etoposide|Drug: filgrastim|Drug: yttrium Y 90 monoclonal antibody M195|Procedure: autologous bone marrow transplantation|Procedure: peripheral blood stem cell transplantation	Phase I	2000
Leukemia|Myelodysplastic Syndromes|Myelodysplastic/Myeloproliferative Diseases	Drug: azacitidine|Drug: sodium phenylbutyrate	Phase I	2000
Leukemia|Myelodysplastic Syndromes|Myelodysplastic/Myeloproliferative Diseases	Drug: sodium phenylbutyrate|Drug: tretinoin	Phase I	2000
Leukemia|Myelodysplastic Syndromes|Myelodysplastic/Myeloproliferative Diseases	Drug: laromustine	Phase I	2002
Leukemia|Myelodysplastic Syndromes|Myelodysplastic/Myeloproliferative Diseases	Drug: cytarabine|Drug: triapine	Phase I	2003
Leukemia|Myelodysplastic Syndromes|Myelodysplastic/Myeloproliferative Diseases	Drug: fludarabine phosphate|Drug: triapine	Phase I	2004
Leukemia|Neuroblastoma|Sarcoma	Drug: tanespimycin	Phase I	2004
Leukemia|Unspecified Childhood Solid Tumor, Protocol Specific	Drug: tanespimycin	Phase I	2004
Liver Cancer	Drug: erlotinib hydrochloride	Phase I	2002
Liver Cancer|Cancer	Drug: melphalan|Procedure: isolated perfusion	Phase I	2001
Liver Disease	Drug: oxaliplatin	Phase I	2000
Liver Metastasis|Pelvic Cancer|Head and Neck Cancer|Sarcoma|Colorectal cancer|Breast Cancer|Colorectal cancer|Mouth Cancer	Drug: LS 11(Taporfin Sodium)|Device: Lumaflex Light Delivery Catheter	Phase I	2001
Liver Neoplasms|Neoplasm Metastasis|Local Neoplasm Recurrences	Drug: NS-9 [Poly I: Poly C]	Phase I	2002
Lung Cancer	Drug: hematoporphyrin derivative|Procedure: brachytherapy	Phase I	1993
Lung Cancer	Drug: topotecan hydrochloride|Procedure: radiation therapy	Phase I	1993
Lung Cancer	Drug: Ad5CMV-p53 gene	Phase I	1998
Lung Cancer	Drug: ras peptide cancer vaccine|Drug: sargramostim	Phase I	1999
Lung Cancer	Drug: Ad5CMV-p53 gene|Procedure: radiation therapy	Phase I	2000
Lung Cancer	Drug: carboplatin|Drug: motexafin gadolinium|Drug: paclitaxel|Procedure: conventional surgery|Procedure: radiation therapy	Phase I	2000
Lung Cancer	Drug: carboplatin|Drug: etoposide|Drug: oblimersen	Phase I	2001
Lung Cancer	Drug: carboplatin|Drug: paclitaxel|Drug: tipifarnib|Procedure: radiation therapy	Phase I	2001
Lung Cancer	Drug: carboplatin|Drug: paclitaxel|Drug: tirapazamine|Procedure: radiation therapy	Phase I	2002
Lung Cancer	Drug: cisplatin|Drug: imatinib mesylate|Drug: irinotecan hydrochloride	Phase I	2002
Lung Cancer	Drug: docetaxel|Drug: gemcitabine hydrochloride|Drug: suramin	Phase I	2003
Lung Cancer	Drug: monoclonal antibody Hu3S193	Phase I	2004
Lung Cancer|Adult sarcoma|Colorectal cancer|Bone Cancer|Ovarian Sarcoma|skin cancer|Colorectal cancer|Colorectal cancer|Breast Cancer|Eye Cancer|Uterine Sarcoma	Drug: interleukin-2|Drug: MAGE-12 peptide vaccine|Drug: Montanide ISA-51	Phase I	2000
Lung Cancer|Mesothelioma|Cancer|Thymoma and Thymic Cancer	Drug: doxorubicin hydrochloride	Phase I	2000
Lung Cancer|Cancer	Drug: doxorubicin hydrochloride	Phase I	1999
Lung Cancer|Cancer	Drug: paclitaxel|Procedure: hyperthermia treatment|Procedure: isolated perfusion	Phase I	1999
Lung Cancer|Cancer	Drug: bortezomib|Drug: carboplatin|Drug: gemcitabine hydrochloride	Phase I	2002
Lung Cancer|lung cancer|Smleukemia Cell Cancer|Local Neoplasm Recurrence	Drug: Rhenium Re 188 P2045	Phase I	2004
Lung Cancer|Unspecified Adult Solid Tumor, Protocol Specific	Drug: bortezomib|Drug: topotecan hydrochloride|Procedure: biopsy|Procedure: flow cytometry|Procedure: immunoenzyme technique|Procedure: immunohistochemistry staining method|Procedure: laboratory biomarker analysis	Phase I	2004
Lymphoma	Drug: romidepsin	Phase I	1997
Lymphoma	Drug: monoclonal antibody HeFi-1	Phase I	1999
Lymphoma	Drug: recombinant interleukin-12|Drug: rituximab	Phase I	1999
Lymphoma	Drug: apolizumab	Phase I	1999
Lymphoma	Drug: monoclonal antibody mono-dgA-RFB4	Phase I	2000
Lymphoma	Drug: aldesleukin|Drug: autologous tumcell vaccine	Phase I	2001
Lymphoma	Drug: bryostatin 1|Drug: vincristine sulfate	Phase I	2001
Lymphoma	Drug: aldesleukin|Drug: recombinant human stem cell factor	Phase I	2002
Lymphoma	Drug: rituximab|Drug: yttrium Y 90 ibritumomab tiuxetan	Phase I	2003
Lymphoma	Drug: cyclophosphamide|Drug: doxorubicin hydrochloride|Drug: oblimersen|Drug: prednisone|Drug: rituximab|Drug: vincristine sulfate	Phase I	2003
Lymphoma	Drug: polyamine analogue PG11047	Phase I	2006
Lymphoma	Drug: anti-CD3 x anti-CD20 bispecific antibody-armed activated T cells	Phase I	2007
Lymphoma, Low-Grade|Lymphoma, Smleukemia Lymphocytic|Lymphoma, Mixed-Cell, Follicular|Lymphoma, Smleukemia Cleaved-Cell, Follicular	Drug: Pixantrone (BBR 2778)|Drug: fludarabine|Drug: dexamethasone|Drug: rituximab	Phase I	2001
Lymphoma, Non-Hodgkin	Drug: recombinant human interleukin 21 and rituximab	Phase I	2006
Lymphoma|Lymphoproliferative Disorder	Drug: filgrastim|Drug: indium In 111 ibritumomab tiuxetan|Drug: rituximab|Drug: yttrium Y 90 ibritumomab tiuxetan|Procedure: peripheral blood stem cell transplantation	Phase I	2002
Lymphoma|skin cancer|Neoplasm Metastasis|kidney cancer	Drug: COL-3	Phase I	1997
Lymphoma|myeloma|leukemia	Drug: Stem cell mobilization	Phase I	2004
Lymphoma|Neoplasms	Drug: 5-Fluorouracil|Drug: Ethynyluracil|Drug: Leucovorin	Phase I	1997
Lymphoma|Ovarian Cancer|Sarcoma|Smleukemia Intestine Cancer|Unspecified Adult Solid Tumor, Protocol Specific	Drug: tanespimycin	Phase I	1999
Lymphoma|Prostate Cancer|Smleukemia Intestine Cancer|Unspecified Adult Solid Tumor, Protocol Specific	Drug: alvocidib	Phase I	1997
Lymphoma|Sarcoma	Drug: altretamine|Drug: etoposide	Phase I	1996
Lymphoma|Smleukemia Intestine Cancer	Drug: monoclonal antibody HuM291	Phase I	2001
Lymphoma|Smleukemia Intestine Cancer|Unspecified Adult Solid Tumor, Protocol Specific	Drug: carboplatin|Drug: filgrastim|Drug: paclitaxel|Drug: topotecan hydrochloride	Phase I	1996
Lymphoma|Smleukemia Intestine Cancer|Unspecified Adult Solid Tumor, Protocol Specific	Drug: irinotecan hydrochloride	Phase I	1998
Lymphoma|Smleukemia Intestine Cancer|Unspecified Adult Solid Tumor, Protocol Specific	Drug: irinotecan hydrochloride|Procedure: mutation analysis	Phase I	1999
Lymphoma|Smleukemia Intestine Cancer|Unspecified Adult Solid Tumor, Protocol Specific	Drug: bortezomib	Phase I	1999
Lymphoma|Smleukemia Intestine Cancer|Unspecified Adult Solid Tumor, Protocol Specific	Drug: aldesleukin|Drug: bryostatin 1	Phase I	1999
Lymphoma|Smleukemia Intestine Cancer|Unspecified Adult Solid Tumor, Protocol Specific	Drug: becatecarin|Drug: cisplatin|Drug: filgrastim	Phase I	1999
Lymphoma|Smleukemia Intestine Cancer|Unspecified Adult Solid Tumor, Protocol Specific	Drug: azacitidine|Drug: sodium phenylbutyrate	Phase I	2000
Lymphoma|Smleukemia Intestine Cancer|Unspecified Adult Solid Tumor, Protocol Specific	Drug: laromustine	Phase I	2001
Lymphoma|Smleukemia Intestine Cancer|Unspecified Adult Solid Tumor, Protocol Specific	Drug: etaracizumab	Phase I	2002
Lymphoma|Smleukemia Intestine Cancer|Unspecified Adult Solid Tumor, Protocol Specific	Drug: laromustine	Phase I	2002
Lymphoma|Smleukemia Intestine Cancer|Unspecified Adult Solid Tumor, Protocol Specific	Drug: decitabine	Phase I	2004
Lymphoma|Smleukemia Intestine Cancer|Unspecified Adult Solid Tumor, Protocol Specific	Drug: entinostat|Drug: isotretinoin	Phase I	2004
Lymphoma|Smleukemia Intestine Cancer|Unspecified Adult Solid Tumor, Protocol Specific	Drug: CDDO|Procedure: laboratory biomarker analysis|Procedure: pharmacological study	Phase I	2006
Lymphoma|Unspecified Adult Solid Tumor, Protocol Specific	Drug: perillyl alcohol	Phase I	1996
Lymphoma|Unspecified Adult Solid Tumor, Protocol Specific	Drug: oral sodium phenylbutyrate|Procedure: chemotherapy	Phase I	1997
Lymphoma|Unspecified Adult Solid Tumor, Protocol Specific	Drug: penclomedine	Phase I	1997
Lymphoma|Unspecified Adult Solid Tumor, Protocol Specific	Drug: tanespimycin	Phase I	1999
Lymphoma|Unspecified Adult Solid Tumor, Protocol Specific	Drug: aflibercept	Phase I	2001
Lymphoma|Unspecified Adult Solid Tumor, Protocol Specific	Drug: oxaliplatin|Drug: pemetrexed disodium	Phase I	2004
Lymphoma|Tumors	Drug: Irinotecan	Phase I	2004
Malignancies|Lymphoma	Drug: Aroplatin	Phase I	2006
brain cancer	Drug: G207	Phase I	2005
brain cancer|brain cancer|Gliosarcoma	Drug: AP23573	Phase I	2004
skin cancer	Drug: Vincristine Sulfate Liposomes Injection	Phase I	2005
skin cancer	Drug: CC-5013	Phase I	2005
Meningeal Neoplasms	Drug: Intrathecal Mafosfamide	Phase I	1990
skin cancer	Drug: 852A	Phase I	2004
skin cancer	Drug: Lenalidomide|Drug: Dacarbazine	Phase I	2005
skin cancer	Drug: CP-675,206|Drug: CP-675,206	Phase I	2006
skin cancer (Skin)	Drug: aldesleukin|Drug: fowlpox virus vaccine vector|Drug: gp100 antigen	Phase I	1996
skin cancer (Skin)	Drug: MART-1 antigen|Drug: filgrastim|Drug: flu matrix peptide p58-66|Drug: gp100 antigen|Drug: recombinant MAGE-3.1 antigen|Drug: tyrosinase peptide|Procedure: in vitro-treated peripheral blood stem cell transplantation	Phase I	1999
skin cancer (Skin)	Drug: recombinant vaccinia-B7.1 vaccine	Phase I	1999
skin cancer (Skin)	Drug: adenovirus RSV-TK|Drug: ganciclovir	Phase I	2000
skin cancer (Skin)	Drug: Synchrotope TA2M plasmid DNA vaccine|Drug: tyrosinase peptide	Phase I	2000
skin cancer (Skin)	Drug: MART-1 antigen|Drug: gp100 antigen|Drug: incomplete Freund's adjuvant|Drug: sargramostim|Drug: tyrosinase peptide	Phase I	2000
skin cancer (Skin)	Drug: autologous tumcell vaccine|Drug: therapeutic autologous dendritic cells	Phase I	2004
skin cancer (Skin)	Drug: aldesleukin|Drug: cyclophosphamide|Drug: filgrastim|Drug: fludarabine phosphate|Drug: gp100-fowlpox vaccine|Drug: therapeutic autologous lymphocytes|Drug: therapeutic tuminfiltrating lymphocytes	Phase I	2004
skin cancer (Skin)	Drug: MART-1 antigen|Drug: gp100 antigen|Drug: incomplete Freund's adjuvant|Drug: recombinant interleukin-7	Phase I	2004
skin cancer (Skin)	Drug: riluzole|Procedure: immunohistochemistry staining method|Procedure: laboratory biomarker analysis|Procedure: neoadjuvant therapy|Procedure: pharmacological study|Procedure: protein expression analysis|Procedure: reverse transcriptase-polymerase chain reaction|Procedure: therapeutic conventional surgery|Procedure: western blotting	Phase I	2007
skin cancer (Skin)|Unspecified Adult Solid Tumor, Protocol Specific	Drug: recombinant interferon gamma	Phase I	1999
skin cancer|Kidney Neoplasms|Metastases	Drug: Recombinant Human Interleukin-21	Phase I	2004
skin cancer|Neoplasm Metastasis	Drug: ADI PEG	Phase I	2001
Meningitis|Neoplasms	Drug: Gemcitabine|Procedure: Lumbar puncture (LP, Spinal Tap)	Phase I	2001
breast cancer	Drug: Capecitabine (Xeloda)|Drug: Docetaxel (Taxotere)	Phase I	2003
Cancer	Drug: interleukin-12 gene	Phase I	2002
Cancer	Drug: mafosfamide	Phase I	2002
Cancer	Drug: docetaxel|Procedure: thoracoscopic surgery	Phase I	2003
Pancreatic Cancer	Drug: Gemcitabine|Drug: Lapatinib	Phase I	2006
kidney cancer|Kidney Cancer	Drug: Bevacizumab and Sunitinib	Phase I	2006
myeloma	Drug: SGN-40 (anti-huCD40 mAb)	Phase I	2004
myeloma	Drug: IPI-504	Phase I	2005
myeloma and Plasma Cell Neoplasm	Drug: 4'-iodo-4'-deoxydoxorubicin	Phase I	2001
myeloma and Plasma Cell Neoplasm	Drug: arsenic trioxide|Drug: ascorbic acid|Drug: bortezomib|Drug: dexamethasone|Drug: thalidomide	Phase I	2005
myeloma and Plasma Cell Neoplasm	Drug: bortezomib|Drug: dexamethasone|Drug: vorinostat	Phase I	2005
myeloma and Plasma Cell Neoplasm|Unspecified Adult Solid Tumor, Protocol Specific	Drug: 2-methoxyestradiol	Phase I	2002
Multiple Sclerosis	Drug: anti-thymocyte globulin|Drug: cyclophosphamide|Drug: filgrastim|Drug: prednisone|Procedure: peripheral blood stem cell transplantation|Procedure: irradiation	Phase I	1997
Myelodysplastic Syndrome (MDS)	Drug: WT1 and PR1 Peptide Vaccine	Phase I	2005
Myeloid Leukemia	Drug: AVE9633	Phase I	2007
Nasopharyngeal Neoplasms	Drug: EBV-LMP-2	Phase I	2004
Neoplasm	Drug: ZD1694 (TOMUDEX)	Phase I	1993
Neoplasm Metastasis	Drug: imexon	Phase I	2005
Neoplasm Metastasis|Liver Neoplasms|Cancer	Drug: CRS-100	Phase I	2006
Neoplasm Metastasis|sarcoma	Drug: OncoLARÂ® (Registered Trademark)|Drug: tamoxifen	Phase I	1995
Neoplasms	Drug: paclitaxel	Phase I	1994
Neoplasms	Drug: gemcitabine|Drug: fluorodeoxyuridine|Drug: leucovorin	Phase I	1995
Neoplasms	Drug: irinotecan (CPT-11)	Phase I	1995
Neoplasms	Drug: Epothilone D (KOS-862)	Phase I	2001
Neoplasms	Drug: LErafAON	Phase I	2001
Neoplasms	Drug: LErafAON	Phase I	2001
Neoplasms	Drug: NM-3	Phase I	2001
Neoplasms	Drug: rhuMAb 2C4	Phase I	2001
Neoplasms	Drug: DN-101	Phase I	2002
Neoplasms	Drug: 852A	Phase I	2003
Neoplasms	Drug: Perifosine|Drug: Gemcitabine	Phase I	2004
Neoplasms	Drug: SNS-595	Phase I	2004
Neoplasms	Drug: Dasatinib	Phase I	2004
Neoplasms	Drug: SNS-595	Phase I	2004
Neoplasms	Drug: Cetuximab + Erlotinib	Phase I	2005
Neoplasms	Drug: AVI-4126 Injection (RESTEN-NGÂ®)	Phase I	2006
Neoplasms	Drug: SSR97225	Phase I	2007
Neoplasms|Hodgkin's Disease|lymphoma	Drug: TPI 287 Injection	Phase I	2005
Neoplasms|Lymphoma, Malignant	Drug: E7820	Phase I	2004
Neoplasms|Metastases, Neoplasm	Drug: ABI-007	Phase I	2000
Neoplasms|Neoplasm Metastasis	Drug: Noni Extract	Phase I	2001
Neuroblastoma	Drug: aldesleukin|Procedure: gene-modified tumcell vaccine therapy	Phase I	1995
Neuroblastoma	Drug: buthionine sulfoximine|Drug: melphalan	Phase I	1996
Neuroblastoma	Drug: Interleukin-2	Phase I	1998
Neuroblastoma	Drug: aldesleukin|Drug: isotretinoin|Drug: monoclonal antibody Ch14.18|Drug: sargramostim	Phase I	2001
Neuroblastoma	Drug: filgrastim|Drug: pyrazoloacridine|Procedure: autologous bone marrow transplantation|Procedure: peripheral blood stem cell transplantation	Phase I	2003
Neuroblastoma	Drug: aldesleukin|Drug: recombinant interleukin-12	Phase I	2003
Neuroblastoma	Drug: cisplatin|Drug: cyclophosphamide|Drug: doxorubicin hydrochloride|Drug: etoposide|Drug: filgrastim|Drug: isotretinoin|Drug: melphalan|Drug: topotecan hydrochloride|Drug: vincristine sulfate|Procedure: conventional surgery|Procedure: peripheral blood stem cell transplantation|Procedure: radiation therapy	Phase I	2004
Neuroblastoma|Unspecified Childhood Solid Tumor, Protocol Specific	Drug: cyclophosphamide|Drug: decitabine|Drug: doxorubicin hydrochloride|Drug: filgrastim|Drug: pegfilgrastim	Phase I	2003
Neuroectodermal Tumor, Primitive|Neuroepithelioma|sarcoma|Sarcoma|Sarcoma, Ewing's	Drug: vincristine, adriamycin and cytoxan, alternating with ifosfamide VP-16	Phase I	1986
Neurofibromatosis Type 1 (nf1)|Precancerous/NonCondition	Drug: pirfenidone	Phase I	2002
Non-Hodgkin Lymphoma	Drug: SGN-40 (anti-huCD40 mAb)	Phase I	2004
lung cancer|Breast Cancer|Prostate Cancer	Drug: imexon|Drug: docetaxel	Phase I	2005
lung cancer	Drug: Cetuximab + Gefitinib	Phase I	2005
lung cancer|kidney cancer|Pancreatic Cancer	Drug: ABR-217620	Phase I	2003
lung cancer	Drug: Tarceva	Phase I	2005
Ovarian Cancer	Drug: melphalan|Drug: mitoxantrone hydrochloride|Drug: tamoxifen citrate|Drug: thiotepa|Procedure: endocrine drug therapy|Procedure: peripheral blood stem cell transplantation	Phase I	1996
Ovarian Cancer	Drug: cisplatin|Drug: filgrastim|Drug: paclitaxel|Drug: topotecan hydrochloride	Phase I	1996
Ovarian Cancer	Drug: MOv-gamma chimeric receptgene|Drug: aldesleukin|Drug: therapeutic leukemiaogeneic lymphocytes	Phase I	1997
Ovarian Cancer	Drug: ALVAC-hB7.1|Drug: recombinant interferon gamma	Phase I	1997
Ovarian Cancer	Drug: Ad5CMV-p53 gene|Procedure: laparoscopic surgery	Phase I	1998
Ovarian Cancer	Drug: indium In 111 monoclonal antibody Hu3S193|Procedure: biopsy|Procedure: immunohistochemistry staining method|Procedure: immunoscintigraphy	Phase I	2000
Ovarian Cancer	Drug: yttrium Y 90 monoclonal antibody Hu3S193	Phase I	2003
Ovarian Cancer	Drug: Topotecan and VP16	Phase I	2004
Ovarian Cancer	Drug: lapatinib	Phase I	2006
Ovarian Cancer|Peritoneal Cavity Cancer	Drug: carboplatin|Drug: paclitaxel|Drug: topotecan hydrochloride	Phase I	2000
Ovarian Cancer|Peritoneal Cavity Cancer	Drug: paclitaxel|Procedure: chemotherapy	Phase I	2000
Ovarian Cancer|Primary Peritoneal Cancer|Fleukemiaopian Tube Cancer	Drug: PS-341 (Bortezomib)|Drug: Carboplatin	Phase I	2003
Ovarian Neoplasms	Drug: taxol	Phase I	1991
Pachyonychia Congenita	Drug: TD101|Drug: Normal saline (placebo)	Phase I	2008
Pancreatic Cancer	Drug: gemcitabine hydrochloride|Procedure: radiation therapy	Phase I	1998
Pancreatic Cancer	Drug: 7-hydroxystaurosporine|Drug: gemcitabine hydrochloride	Phase I	2002
Pancreatic Cancer	Drug: alvocidib|Drug: gemcitabine hydrochloride|Procedure: radiation therapy	Phase I	2002
Pancreatic Cancer	Drug: gemcitabine hydrochloride|Drug: pemetrexed disodium|Procedure: radiation therapy	Phase I	2005
Pancreatic Cancer|stomach cancer|Duodenum Cancer|Bile Duct Cancer	Drug: irinotecan|Procedure: radiation therapy	Phase I	2000
Pancreatic Cancer|Mesothelioma|Ovarian Cancer|lung cancer	Drug: MORA009	Phase I	2006
Pancreatic Cancer|Unspecified Adult Solid Tumor, Protocol Specific	Drug: erlotinib hydrochloride|Drug: gemcitabine hydrochloride	Phase I	2001
Polycystic Ovary Syndrome	Drug: Oral Cinnamon Extract	Phase I	2005
Prostate Cancer	Drug: sargramostim|Procedure: recombinant viral vaccine therapy	Phase I	1996
Prostate Cancer	Drug: estramustine phosphate sodium|Drug: paclitaxel	Phase I	1997
Prostate Cancer	Drug: carboplatin|Drug: docetaxel|Drug: estramustine phosphate sodium	Phase I	1999
Prostate Cancer	Drug: genistein	Phase I	1999
Prostate Cancer	Drug: motexafin lutetium	Phase I	2000
Prostate Cancer	Drug: lycopene	Phase I	2000
Prostate Cancer	Drug: celecoxib|Procedure: conventional surgery|Procedure: neoadjuvant therapy	Phase I	2001
Prostate Cancer	Drug: Oral Triamcinalone	Phase I	2002
Prostate Cancer	Drug: therapeutic autologous lymphocytes	Phase I	2002
Prostate Cancer	Drug: MLN2704	Phase I	2002
Prostate Cancer	Drug: MLN2704 (DM1 conjugated monoclonal antibody MLN591)	Phase I	2002
Prostate Cancer	Drug: pegylated liposomal doxorubicin hydrochloride|Procedure: hyperthermia treatment	Phase I	2003
Prostate Cancer	Drug: docetaxel	Phase I	2004
Prostate Cancer	Drug: Docetaxel|Drug: Docetaxel|Drug: Docetaxel|Drug: Docetaxel	Phase I	2004
Prostate Cancer	Drug: docetaxel|Drug: epirubicin hydrochloride	Phase I	2004
Prostate Cancer	Drug: lycopene	Phase I	2004
Prostate Cancer	Drug: nordihydroguaiaretic acid	Phase I	2005
Prostate Cancer	Drug: bicalutamide|Drug: flutamide|Drug: goserelin|Drug: leuprolide acetate|Drug: nilutamide|Drug: temsirolimus	Phase I	2007
Prostate Cancer|Unspecified Adult Solid Tumor, Protocol Specific	Drug: tributyrin|Procedure: chemotherapy	Phase I	1995
Colorectal cancer|Extensive Stage lung cancer|Stage III Pancreatic Cancer|Stage III Colorectal cancer|Limited Stage lung cancer|Pancreatic Cancer|Colorectal cancer|Stage III lung cancer|Stage I Pancreatic Cancer|Stage II lung cancer|Stage IVB Pancreatic Cancer|Stage II Pancreatic Cancer|Stage III Colorectal cancer|Stage IVA Pancreatic Cancer	Drug: Detox-B adjuvant|Drug: ras peptide cancer vaccine	Phase I	1995
Refractory Solid Tumors	Drug: MPC-6827	Phase I	2005
Relapsed Refractory myeloma	Drug: thymoglobulin	Phase I	2006
Sarcoma	Drug: semaxanib	Phase I	1998
Sarcoma	Drug: cilengitide	Phase I	2000
Sarcoma	Drug: leucovorin calcium|Drug: methotrexate|Drug: trimetrexate glucuronate	Phase I	2005
Sarcoma|Unspecified Adult Solid Tumor, Protocol Specific	Drug: pegylated liposomal doxorubicin hydrochloride|Drug: valspodar	Phase I	1998
Scleritis	Drug: Infliximab	Phase I	2003
Shingles|Bone Marrow Transplantation	Drug: Valacyclovir	Phase I	1998
lung cancer|Pancreatic Cancer|Head and Neck Cancer|stomach cancer|esophagus cancer	Drug: Topotecan and pegylated doxorubicin	Phase I	2004
sarcoma	Drug: Yondelis and doxorubicin	Phase I	2005
Solid Malignancies	Drug: Ixabepilone	Phase I	2005
Solid TumCancer	Drug: S485232	Phase I	2003
Solid TumCancer	Drug: lapatinib and docetaxel	Phase I	2003
Solid TumCancer	Drug: S743921	Phase I	2004
Solid TumCancer	Drug: Ispinesib|Drug: carboplatin	Phase I	2004
Solid TumCancer	Drug: Ispinesib|Drug: Capecitabine	Phase I	2004
Solid TumCancer	Drug: GW786034 (pazopanib)	Phase I	2006
Solid TumCancer|Lymphoma	Drug: S485232	Phase I	2004
Solid Tumors	Drug: topotecan	Phase I	2002
Solid Tumors	Drug: clofarabine (oral formulation)	Phase I	2003
Solid Tumors Refractory To Standard Therapy|Neoplasms	Drug: Kanglaite Injection (KLT)	Phase I	2001
Solid Tumors|Leukemia, Lymphocytic, Acute, Pediatric|Leukemia, Lymphocytic, Acute, Adult|Leukemia, Myelocytic, Acute, Pediatric|Leukemia, Myelocytic, Acute, Adult|Myelodysplastic Syndromes, Adult	Drug: clofarabine (IV formulation)	Phase I	2002
Systemic Lupus Erythematosus	Drug: hLL2 (Epratuzumab)	Phase I	2001
Systemic Lupus Erythematosus	Drug: MRA	Phase I	2002
T-Cell Lymphoma|lymphoma	Drug: CHOP and alemtuzumab	Phase I	2004
Tinea Pedis	Drug: W0027|Drug: Placebo	Phase I	2007
Tumor	Drug: topotecan	Phase I	2004
Tumors	Drug: Liposome Encapsulated Mitoxantrone (LEM)	Phase I	2001
Tumors	Drug: G3139, Oblimersen sodium, Bcl-2 antisense oligonucleotide	Phase I	2005
Tumors	Drug: Brivanib|Drug: Brivanib	Phase I	2007
Tumors|Lymphoma	Drug: CNF2024	Phase I	2006
Tumors|Lymphoma|myeloma	Drug: AP23573	Phase I	2003
Tumors|Neoplasm Metastasis	Drug: Brivanib|Drug: Brivanib|Drug: Brivanib|Drug: Brivanib|Drug: Brivanib|Drug: Brivanab	Phase I	2004
Tumors|Non lymphoma	Drug: MGCD0103	Phase I	2004
Unspecified Adult Solid Tumor, Protocol Specific	Drug: paclitaxel|Drug: topotecan hydrochloride	Phase I	1994
Unspecified Adult Solid Tumor, Protocol Specific	Drug: O6-benzylguanine|Drug: carmustine|Procedure: chemosensitization/potentiation therapy	Phase I	1996
Unspecified Adult Solid Tumor, Protocol Specific	Drug: aldesleukin	Phase I	1996
Unspecified Adult Solid Tumor, Protocol Specific	Drug: penclomedine	Phase I	1996
Unspecified Adult Solid Tumor, Protocol Specific	Drug: irinotecan hydrochloride|Drug: raltitrexed	Phase I	1997
Unspecified Adult Solid Tumor, Protocol Specific	Drug: KRN5500	Phase I	1997
Unspecified Adult Solid Tumor, Protocol Specific	Drug: bizelesin	Phase I	1997
Unspecified Adult Solid Tumor, Protocol Specific	Drug: irinotecan hydrochloride|Drug: pemetrexed disodium	Phase I	1997
Unspecified Adult Solid Tumor, Protocol Specific	Drug: bryostatin 1|Drug: cisplatin	Phase I	1997
Unspecified Adult Solid Tumor, Protocol Specific	Drug: BMS-184476	Phase I	1997
Unspecified Adult Solid Tumor, Protocol Specific	Drug: ifosfamide|Drug: topotecan hydrochloride	Phase I	1997
Unspecified Adult Solid Tumor, Protocol Specific	Drug: bryostatin 1|Drug: cisplatin	Phase I	1998
Unspecified Adult Solid Tumor, Protocol Specific	Drug: bryostatin 1|Drug: cisplatin|Drug: paclitaxel	Phase I	1998
Unspecified Adult Solid Tumor, Protocol Specific	Drug: EF5|Procedure: conventional surgery|Procedure: fluorescent antibody technique	Phase I	1998
Unspecified Adult Solid Tumor, Protocol Specific	Drug: triapine	Phase I	1998
Unspecified Adult Solid Tumor, Protocol Specific	Drug: aldesleukin|Drug: therapeutic autologous lymphocytes|Drug: therapeutic tuminfiltrating lymphocytes	Phase I	1998
Unspecified Adult Solid Tumor, Protocol Specific	Drug: calcitriol|Drug: paclitaxel	Phase I	1998
Unspecified Adult Solid Tumor, Protocol Specific	Drug: recombinant interleukin-12	Phase I	1998
Unspecified Adult Solid Tumor, Protocol Specific	Drug: cisplatin|Drug: irinotecan hydrochloride|Drug: paclitaxel	Phase I	1998
Unspecified Adult Solid Tumor, Protocol Specific	Drug: cyclophosphamide|Drug: filgrastim|Drug: melphalan|Drug: paclitaxel|Drug: thiotepa|Procedure: autologous bone marrow transplantation|Procedure: peripheral blood stem cell transplantation	Phase I	1999
Unspecified Adult Solid Tumor, Protocol Specific	Drug: 7-hydroxystaurosporine|Drug: fluorouracil	Phase I	1999
Unspecified Adult Solid Tumor, Protocol Specific	Drug: GEM 231|Drug: docetaxel	Phase I	1999
Unspecified Adult Solid Tumor, Protocol Specific	Drug: GEM 231|Drug: paclitaxel	Phase I	1999
Unspecified Adult Solid Tumor, Protocol Specific	Drug: ixabepilone	Phase I	1999
Unspecified Adult Solid Tumor, Protocol Specific	Drug: cefixime|Drug: ceftriaxone sodium|Drug: ciprofloxacin|Drug: salmonella VNP20009|Drug: trimethoprim-sulfamethoxazole	Phase I	1999
Unspecified Adult Solid Tumor, Protocol Specific	Drug: GPX-100	Phase I	1999
Unspecified Adult Solid Tumor, Protocol Specific	Drug: fluorouracil|Drug: gemcitabine hydrochloride|Drug: oxaliplatin	Phase I	1999
Unspecified Adult Solid Tumor, Protocol Specific	Drug: gemcitabine hydrochloride|Drug: oxaliplatin	Phase I	1999
Unspecified Adult Solid Tumor, Protocol Specific	Drug: recombinant human endostatin	Phase I	1999
Unspecified Adult Solid Tumor, Protocol Specific	Drug: SarCNU	Phase I	1999
Unspecified Adult Solid Tumor, Protocol Specific	Drug: etoposide|Drug: leucovorin calcium|Drug: tegafur-uracil	Phase I	1999
Unspecified Adult Solid Tumor, Protocol Specific	Drug: leucovorin calcium|Drug: paclitaxel|Drug: tegafur-uracil	Phase I	1999
Unspecified Adult Solid Tumor, Protocol Specific	Drug: fluorouracil|Drug: irinotecan hydrochloride|Drug: leucovorin calcium|Drug: oxaliplatin	Phase I	2000
Unspecified Adult Solid Tumor, Protocol Specific	Drug: oxaliplatin	Phase I	2000
Unspecified Adult Solid Tumor, Protocol Specific	Drug: perifosine	Phase I	2000
Unspecified Adult Solid Tumor, Protocol Specific	Drug: carboplatin|Drug: paclitaxel|Drug: tirapazamine	Phase I	2000
Unspecified Adult Solid Tumor, Protocol Specific	Drug: docetaxel|Drug: oxaliplatin	Phase I	2000
Unspecified Adult Solid Tumor, Protocol Specific	Drug: recombinant human endostatin	Phase I	2000
Unspecified Adult Solid Tumor, Protocol Specific	Drug: cisplatin|Drug: fenretinide|Drug: paclitaxel	Phase I	2000
Unspecified Adult Solid Tumor, Protocol Specific	Drug: TG4010	Phase I	2000
Unspecified Adult Solid Tumor, Protocol Specific	Drug: bryostatin 1|Drug: gemcitabine hydrochloride	Phase I	2000
Unspecified Adult Solid Tumor, Protocol Specific	Drug: salmonella VNP20009	Phase I	2000
Unspecified Adult Solid Tumor, Protocol Specific	Drug: triapine	Phase I	2000
Unspecified Adult Solid Tumor, Protocol Specific	Drug: aldesleukin|Drug: recombinant interleukin-12	Phase I	2000
Unspecified Adult Solid Tumor, Protocol Specific	Drug: capecitabine|Drug: oxaliplatin	Phase I	2000
Unspecified Adult Solid Tumor, Protocol Specific	Drug: cisplatin|Drug: irinotecan hydrochloride|Drug: semaxanib	Phase I	2000
Unspecified Adult Solid Tumor, Protocol Specific	Drug: tipifarnib|Drug: topotecan hydrochloride	Phase I	2000
Unspecified Adult Solid Tumor, Protocol Specific	Drug: BMS-214662	Phase I	2000
Unspecified Adult Solid Tumor, Protocol Specific	Drug: paclitaxel|Drug: semaxanib	Phase I	2000
Unspecified Adult Solid Tumor, Protocol Specific	Drug: capecitabine|Drug: irinotecan hydrochloride|Drug: oxaliplatin	Phase I	2000
Unspecified Adult Solid Tumor, Protocol Specific	Drug: cisplatin|Drug: paclitaxel|Drug: triapine	Phase I	2000
Unspecified Adult Solid Tumor, Protocol Specific	Drug: FOLFIRI regimen|Drug: fluorouracil|Drug: irinotecan hydrochloride|Drug: leucovorin calcium	Phase I	2001
Unspecified Adult Solid Tumor, Protocol Specific	Drug: 7-hydroxystaurosporine|Drug: cisplatin	Phase I	2001
Unspecified Adult Solid Tumor, Protocol Specific	Drug: 7-hydroxystaurosporine|Drug: cisplatin	Phase I	2001
Unspecified Adult Solid Tumor, Protocol Specific	Drug: alvocidib|Drug: docetaxel	Phase I	2001
Unspecified Adult Solid Tumor, Protocol Specific	Drug: benzoylphenylurea	Phase I	2001
Unspecified Adult Solid Tumor, Protocol Specific	Drug: benzoylphenylurea	Phase I	2001
Unspecified Adult Solid Tumor, Protocol Specific	Drug: cisplatin|Drug: triapine	Phase I	2001
Unspecified Adult Solid Tumor, Protocol Specific	Drug: 10-propargyl-10-deazaaminopterin|Drug: probenecid	Phase I	2001
Unspecified Adult Solid Tumor, Protocol Specific	Drug: alvocidib|Drug: fluorouracil|Drug: irinotecan hydrochloride|Drug: leucovorin calcium	Phase I	2001
Unspecified Adult Solid Tumor, Protocol Specific	Drug: bortezomib|Drug: doxorubicin hydrochloride	Phase I	2001
Unspecified Adult Solid Tumor, Protocol Specific	Drug: SU6668	Phase I	2001
Unspecified Adult Solid Tumor, Protocol Specific	Drug: phenoxodiol	Phase I	2001
Unspecified Adult Solid Tumor, Protocol Specific	Drug: tipifarnib	Phase I	2001
Unspecified Adult Solid Tumor, Protocol Specific	Drug: 2-methoxyestradiol	Phase I	2001
Unspecified Adult Solid Tumor, Protocol Specific	Drug: bortezomib|Drug: carboplatin|Drug: etoposide	Phase I	2001
Unspecified Adult Solid Tumor, Protocol Specific	Drug: irinotecan hydrochloride	Phase I	2001
Unspecified Adult Solid Tumor, Protocol Specific	Drug: BMS-214662|Drug: trastuzumab	Phase I	2001
Unspecified Adult Solid Tumor, Protocol Specific	Drug: bortezomib|Drug: carboplatin|Drug: paclitaxel	Phase I	2001
Unspecified Adult Solid Tumor, Protocol Specific	Drug: carboplatin|Drug: ixabepilone	Phase I	2002
Unspecified Adult Solid Tumor, Protocol Specific	Drug: R(+)XK469	Phase I	2002
Unspecified Adult Solid Tumor, Protocol Specific	Drug: erlotinib hydrochloride|Drug: paclitaxel|Drug: trastuzumab	Phase I	2002
Unspecified Adult Solid Tumor, Protocol Specific	Drug: 7-hydroxystaurosporine|Drug: carboplatin	Phase I	2002
Unspecified Adult Solid Tumor, Protocol Specific	Drug: cilengitide	Phase I	2002
Unspecified Adult Solid Tumor, Protocol Specific	Drug: exatecan mesylate	Phase I	2002
Unspecified Adult Solid Tumor, Protocol Specific	Drug: gemcitabine hydrochloride|Drug: ixabepilone	Phase I	2002
Unspecified Adult Solid Tumor, Protocol Specific	Drug: capecitabine|Drug: gefitinib	Phase I	2002
Unspecified Adult Solid Tumor, Protocol Specific	Drug: 7-hydroxystaurosporine|Drug: fluorouracil|Drug: leucovorin calcium	Phase I	2002
Unspecified Adult Solid Tumor, Protocol Specific	Drug: eribulin mesylate	Phase I	2002
Unspecified Adult Solid Tumor, Protocol Specific	Drug: carboplatin|Drug: oblimersen|Drug: paclitaxel	Phase I	2002
Unspecified Adult Solid Tumor, Protocol Specific	Drug: capecitabine|Drug: fluorouracil|Drug: leucovorin calcium|Drug: oxaliplatin	Phase I	2002
Unspecified Adult Solid Tumor, Protocol Specific	Drug: polyglutamate camptothecin	Phase I	2003
Unspecified Adult Solid Tumor, Protocol Specific	Drug: irinotecan hydrochloride|Drug: thalidomide	Phase I	2003
Unspecified Adult Solid Tumor, Protocol Specific	Drug: capecitabine|Drug: imatinib mesylate	Phase I	2003
Unspecified Adult Solid Tumor, Protocol Specific	Drug: anakinra	Phase I	2003
Unspecified Adult Solid Tumor, Protocol Specific	Drug: CMV pp65 peptide|Drug: carcinoembryonic antigen peptide 1-6D|Drug: therapeutic autologous dendritic cells	Phase I	2003
Unspecified Adult Solid Tumor, Protocol Specific	Drug: bortezomib|Drug: oxaliplatin	Phase I	2003
Unspecified Adult Solid Tumor, Protocol Specific	Drug: GTI-2040|Drug: gemcitabine hydrochloride	Phase I	2004
Unspecified Adult Solid Tumor, Protocol Specific	Drug: DJ-927|Drug: capecitabine	Phase I	2004
Unspecified Adult Solid Tumor, Protocol Specific	Drug: alvocidib|Drug: gemcitabine hydrochloride|Drug: irinotecan hydrochloride	Phase I	2004
Unspecified Adult Solid Tumor, Protocol Specific	Drug: doxorubicin hydrochloride|Drug: triapine	Phase I	2004
Unspecified Adult Solid Tumor, Protocol Specific	Drug: irinotecan hydrochloride|Drug: triapine	Phase I	2004
Unspecified Adult Solid Tumor, Protocol Specific	Drug: docetaxel|Drug: lenalidomide	Phase I	2004
Unspecified Adult Solid Tumor, Protocol Specific	Drug: BMS-599626	Phase I	2004
Unspecified Adult Solid Tumor, Protocol Specific	Drug: O6-benzylguanine|Drug: filgrastim|Drug: ifosfamide	Phase I	2004
Unspecified Adult Solid Tumor, Protocol Specific	Drug: resveratrol	Phase I	2004
Unspecified Adult Solid Tumor, Protocol Specific	Drug: defined green tea catechin extract	Phase I	2004
Unspecified Adult Solid Tumor, Protocol Specific	Drug: calcitriol|Drug: dexamethasone|Drug: ketoconazole	Phase I	2004
Unspecified Adult Solid Tumor, Protocol Specific	Drug: indole-3-carbinol	Phase I	2004
Unspecified Adult Solid Tumor, Protocol Specific	Drug: cetuximab|Procedure: immunologic technique|Procedure: laboratory biomarker analysis|Procedure: molecular diagnostic method	Phase I	2004
Unspecified Adult Solid Tumor, Protocol Specific	Drug: SJG-136	Phase I	2004
Unspecified Adult Solid Tumor, Protocol Specific	Drug: irinotecan hydrochloride|Drug: tanespimycin	Phase I	2005
Unspecified Adult Solid Tumor, Protocol Specific	Drug: Bowman-Birk inhibitconcentrate	Phase I	2006
Unspecified Adult Solid Tumor, Protocol Specific	Drug: gemcitabine hydrochloride|Drug: paclitaxel albumin-stabilized nanoparticle formulation	Phase I	2006
Unspecified Adult Solid Tumor, Protocol Specific|Neutropenia	Drug: BMS-247550|Drug: filgrastim	Phase I	2000
Unspecified Adult Solid Tumor, Protocol Specific|Unspecified Childhood Solid Tumor, Protocol Specific	Drug: arsenic trioxide	Phase I	1998
Unspecified Adult Solid Tumor, Protocol Specific|Unspecified Childhood Solid Tumor, Protocol Specific	Drug: BMS-214662	Phase I	2000
Unspecified Childhood Solid Tumor, Protocol Specific	Drug: gemcitabine hydrochloride	Phase I	1996
Unspecified Childhood Solid Tumor, Protocol Specific	Drug: irofulven	Phase I	1998
Unspecified Childhood Solid Tumor, Protocol Specific	Drug: irinotecan hydrochloride	Phase I	1998
Unspecified Childhood Solid Tumor, Protocol Specific	Drug: oxaliplatin	Phase I	2000
Unspecified Childhood Solid Tumor, Protocol Specific	Drug: irinotecan hydrochloride	Phase I	2000
Unspecified Childhood Solid Tumor, Protocol Specific	Drug: trabectedin	Phase I	2000
Unspecified Childhood Solid Tumor, Protocol Specific	Drug: gefitinib	Phase I	2002
Unspecified Childhood Solid Tumor, Protocol Specific	Drug: pemetrexed disodium	Phase I	2003
Unspecified Childhood Solid Tumor, Protocol Specific	Drug: bevacizumab	Phase I	2003
Von Hippel-Lindau Syndrome	Drug: Ranibizumab	Phase I	2004
leukemia	Drug: Vincristine Sulfate Liposomes Injection|Drug: Dexamethasone	Phase I|Phase II	2002
leukemia	Drug: Pixantrone IV infusion	Phase I|Phase II	2005
leukemia|Agnogenic Myeloid Metaplasia|leukemia	Drug: imatinib mesylate (Gleevec)|Drug: PTK 787 (vatalanib)	Phase I|Phase II	2004
leukemia|Myelodysplastic Syndrome|leukemia	Drug: Mylotarg	Phase I|Phase II	2001
Anal Cancer	Drug: HspE7	Phase I|Phase II	2002
leukemia	Drug: forodesine hydrochloride (BCX-1777)	Phase I|Phase II	2004
Bladder Cancer	Drug: paclitaxel	Phase I|Phase II	1996
brain cancer	Drug: iodine I 131 monoclonal antibody 81C6	Phase I|Phase II	1993
brain cancer	Drug: irinotecan hydrochloride	Phase I|Phase II	1998
brain cancer	Drug: irinotecan hydrochloride	Phase I|Phase II	1998
brain cancer	Drug: procarbazine hydrochloride	Phase I|Phase II	1999
brain cancer	Drug: semaxanib	Phase I|Phase II	2000
brain cancer	Drug: carmustine|Drug: efaproxiral	Phase I|Phase II	2000
brain cancer	Drug: COL-3	Phase I|Phase II	2000
brain cancer	Drug: cilengitide	Phase I|Phase II	2000
brain cancer	Drug: cintredekin besudotox|Procedure: conventional surgery|Procedure: isolated perfusion	Phase I|Phase II	2000
brain cancer	Drug: irinotecan hydrochloride|Drug: temozolomide	Phase I|Phase II	2000
brain cancer	Drug: oxaliplatin	Phase I|Phase II	2000
brain cancer	Drug: imatinib mesylate|Procedure: adjuvant therapy|Procedure: radiation therapy	Phase I|Phase II	2001
brain cancer	Drug: irofulven	Phase I|Phase II	2001
brain cancer	Drug: temsirolimus	Phase I|Phase II	2001
brain cancer	Drug: erlotinib hydrochloride	Phase I|Phase II	2002
brain cancer	Drug: ixabepilone	Phase I|Phase II	2002
brain cancer	Drug: imatinib mesylate	Phase I|Phase II	2002
brain cancer	Drug: gimatecan	Phase I|Phase II	2004
brain cancer	Drug: TGFa-PE38 immunotoxin|Procedure: conventional surgery	Phase I|Phase II	2004
brain cancer	Drug: romidepsin	Phase I|Phase II	2004
brain cancer	Drug: cilengitide|Drug: temozolomide|Procedure: adjuvant therapy|Procedure: radiation therapy	Phase I|Phase II	2005
brain cancer	Drug: cintredekin besudotox|Procedure: conventional surgery	Phase I|Phase II	2005
brain cancer	Drug: filgrastim|Drug: topotecan hydrochloride|Procedure: radiation therapy	Phase I|Phase II	2005
brain cancer	Drug: ATN-161|Drug: carboplatin	Phase I|Phase II	2006
brain cancer|Childhood Germ Cell Tumor|Head and Neck Cancer|Kidney Cancer|Neuroblastoma|Ovarian Cancer|Sarcoma|Testicular cancer	Drug: filgrastim|Drug: temozolomide|Procedure: peripheral blood stem cell transplantation	Phase I|Phase II	2000
Breast Cancer	Drug: annamycin liposomal	Phase I|Phase II	1998
Breast Cancer	Drug: alvocidib|Drug: docetaxel	Phase I|Phase II	2000
Breast Cancer	Drug: letrozole 2.5 mg	Phase I|Phase II	2003
Breast Cancer	Drug: paclitaxel|Drug: suramin	Phase I|Phase II	2003
Breast Cancer	Drug: docetaxel|Drug: doxorubicin hydrochloride|Drug: filgrastim|Drug: oblimersen|Drug: pegfilgrastim|Procedure: conventional surgery|Procedure: neoadjuvant therapy	Phase I|Phase II	2003
Breast Cancer|Ovarian Cancer	Drug: aldesleukin|Drug: p53 peptide vaccine|Procedure: in vitro-treated peripheral blood stem cell transplantation	Phase I|Phase II	2000
Breast Neoplasms	Drug: Placebo|Drug: AG-013736 (axitinib)	Phase I|Phase II	2004
Breast Neoplasms - Phase I|Neoplasm Metastasis - Phase II	Drug: CPG 7909|Drug: Herceptin	Phase I|Phase II	2002
Breast|Cancer	Drug: Carboplatin|Device: Capecitabine|Drug: Vinorelbine	Phase I|Phase II	2000
Cancer	Drug: MEDI-522|Drug: MEDI-522|Drug: MEDI-522|Drug: MEDI-522|Drug: MEDI-522	Phase I|Phase II	2001
Cancer	Drug: Ixabepilone|Drug: Ixabepilone|Drug: Ixabepilone	Phase I|Phase II	2006
Cancer	Drug: ARQ 501	Phase I|Phase II	2006
Cancer of Head and Neck|Head Cancer|Head and Neck Cancer|Neck Cancer|Neck Neoplasms	Drug: Cisplatin|Drug: Docetaxel|Procedure: Radiotherapy	Phase I|Phase II	2002
Cancer-Related Problem/Condition|Chronic Myeloproliferative Disorders|Leukemia|Myelodysplastic Syndromes	Drug: busulfan|Drug: cytarabine|Drug: etoposide|Drug: filgrastim|Drug: fludarabine phosphate|Drug: isotretinoin|Drug: topotecan hydrochloride|Drug: vitamin E|Procedure: bone marrow ablation with stem cell support|Procedure: peripheral blood stem cell transplantation	Phase I|Phase II	1998
Cancer-Related Problem/Condition|Congenital Amegakaryocytic Thrombocytopenia|Diamond-Blackfan Anemia|Fanconi Anemia|Leukemia|Severe Congenital Neutropenia	Drug: anti-thymocyte globulin|Drug: busulfan|Drug: fludarabine phosphate|Procedure: leukemiaogeneic bone marrow transplantation|Procedure: peripheral blood stem cell transplantation|Procedure: radiation therapy|Procedure: umbilical cord blood transplantation	Phase I|Phase II	2000
Cancer-Related Problem/Condition|Head and Neck Cancer|Lung Cancer|Ovarian Cancer	Drug: erlotinib hydrochloride|Procedure: management of therapy complications	Phase I|Phase II	2003
Cancer-Related Problem/Condition|Lung Cancer	Drug: amifostine trihydrate|Drug: cisplatin|Drug: etoposide|Drug: filgrastim|Drug: paclitaxel|Drug: topotecan hydrochloride|Procedure: radiation therapy	Phase I|Phase II	2001
Cancer-Related Problem/Condition|Lymphoma	Drug: pentetic acid calcium|Drug: yttrium Y 90 daclizumab	Phase I|Phase II	1996
Cancer-Related Problem/Condition|Unspecified Childhood Solid Tumor, Protocol Specific	Drug: anidulafungin	Phase I|Phase II	2003
lung cancer	Drug: calcitriol + docetaxel	Phase I|Phase II	2003
kidney cancer	Drug: leukemiaogeneic DCs and Autologous RCC TumDerived Cells	Phase I|Phase II	2002
kidney cancer|Metastases, Neoplasm	Drug: GTI-2040	Phase I|Phase II	2002
Cancer, Transitional Cell	Drug: Pemetrexed|Drug: Gemcitabine|Drug: Platinol	Phase I|Phase II	2004
Cervical Cancer	Drug: cisplatin|Drug: paclitaxel|Procedure: brachytherapy|Procedure: radiation therapy	Phase I|Phase II	1999
Cervical Cancer	Drug: celecoxib|Drug: cisplatin|Drug: fluorouracil|Procedure: brachytherapy|Procedure: radiation therapy	Phase I|Phase II	2001
Cervical Intraepithelial Neoplasia	Drug: EM-1421	Phase I|Phase II	2004
leukemia|CLL	Drug: Oblimerson sodium, G3139	Phase I|Phase II	2001
leukemia|Smleukemia Lymphocytic Lymphoma|Leukemia|Lymphoma	Drug: motexafin gadolinium	Phase I|Phase II	2005
Chronic Myeloproliferative Disorders|Kidney Cancer|Leukemia|Lymphoma|myeloma and Plasma Cell Neoplasm|Myelodysplastic Syndromes|Myelodysplastic/Myeloproliferative Diseases	Drug: cyclosporine|Drug: fludarabine phosphate|Drug: mycophenolate mofetil|Drug: therapeutic leukemiaogeneic lymphocytes|Procedure: peripheral blood stem cell transplantation|Procedure: radiation therapy	Phase I|Phase II	2001
Colorectal cancer	Drug: fluorouracil|Drug: indomethacin|Drug: recombinant interferon gamma|Drug: sodium phenylbutyrate	Phase I|Phase II	1997
Colorectal cancer	Drug: aldesleukin|Drug: ras peptide cancer vaccine|Procedure: adjuvant therapy	Phase I|Phase II	1999
Colorectal cancer	Drug: irinotecan hydrochloride|Drug: oblimersen	Phase I|Phase II	2000
Colorectal cancer	Drug: irinotecan hydrochloride|Drug: semaxanib	Phase I|Phase II	2000
Colorectal cancer	Drug: BCG vaccine|Drug: autologous tumcell vaccine|Drug: fluorouracil|Drug: leucovorin calcium|Procedure: adjuvant therapy	Phase I|Phase II	2001
Colorectal cancer	Drug: gefitinib|Drug: oxaliplatin	Phase I|Phase II	2001
Colorectal cancer	Drug: erlotinib hydrochloride|Drug: fluorouracil|Drug: leucovorin calcium|Drug: oxaliplatin	Phase I|Phase II	2002
Colorectal cancer	Drug: capecitabine|Drug: oxaliplatin|Procedure: conventional surgery|Procedure: neoadjuvant therapy|Procedure: radiation therapy	Phase I|Phase II	2003
Colorectal cancer|Colorectal cancer|Colorectal cancer|Colorectal Neoplasms|Colorectal cancer|Breast Cancer|Breast Neoplasms	Drug: hMN14 (labetuzumab)	Phase I|Phase II	2000
Colorectal cancer|Colorectal cancer|Colorectal cancer|Colorectal Neoplasms|Colorectal cancer|Colorectal Tumor	Drug: hMN14 (labetuzumab)	Phase I|Phase II	2000
Colorectal cancer|Kidney Cancer	Drug: fluorouracil|Drug: recombinant interferon alfa|Drug: sargramostim|Drug: therapeutic autologous lymphocytes	Phase I|Phase II	2001
Colorectal cancer|Liver Neoplasms	Drug: NV1020	Phase I|Phase II	2004
Colorectal cancer|Cancer	Drug: carcinoembryonic antigen RNA-pulsed DC cancer vaccine	Phase I|Phase II	1998
Colorectal cancer|Metastases	Drug: Ad.hIFN-Î² (BG00001, IDEC-201)	Phase I|Phase II	2005
Cutaneous T-Cell Lymphoma	Drug: bexarotene|Device: photopheresis	Phase I|Phase II	2001
Epidemic skin cancer|skin cancer	Drug: interleukin-12	Phase I|Phase II	1997
esophagus cancer	Drug: cisplatin|Drug: fluorouracil|Drug: paclitaxel|Procedure: radiation therapy|Procedure: surgical procedure	Phase I|Phase II	1997
Extrahepatic Bile Duct Cancer|Gleukemiabladder Cancer|Liver Cancer	Drug: gemcitabine hydrochloride|Drug: pemetrexed disodium	Phase I|Phase II	2004
Fanconi's Anemia	Drug: anti-thymocyte globulin|Drug: cyclophosphamide|Drug: cyclosporine|Drug: filgrastim|Drug: fludarabine|Drug: methylprednisolone	Phase I|Phase II	2000
Germ Cell Tumors|Hepatic Cancer|Neuroblastoma|sarcoma|Rhabdomyosarcoma	Drug: Recombinant Human Thrombopoietin	Phase I|Phase II	2000
brain cancer Multiforme	Drug: AEE788	Phase I|Phase II	2003
brain cancer|Brain Neoplasm	Drug: 131I-TM-601	Phase I|Phase II	2002
Graft vs Host Disease	Drug: Visilizumab	Phase I|Phase II	2002
Graft vs Host Disease	Drug: Thymoglobulin (ATG)	Phase I|Phase II	2006
Graft-Vs-Host Disease	Drug: Recombinant Human Keratinocyte Growth Fact(rHuKGF)	Phase I|Phase II	2001
Head and Neck Cancer	Drug: ethynyluracil|Drug: fluorouracil|Drug: hydroxyurea|Procedure: radiation therapy	Phase I|Phase II	1999
Head and Neck Cancer	Drug: cisplatin|Drug: ixabepilone	Phase I|Phase II	2002
Head and Neck Cancer	Drug: cisplatin|Drug: combretastatin A4 phosphate|Drug: doxorubicin hydrochloride|Drug: filgrastim|Drug: pegfilgrastim|Procedure: radiation therapy	Phase I|Phase II	2003
Head and Neck Cancer	Drug: ABT-510	Phase I|Phase II	2005
Head and Neck Cancer	Drug: Ad5CMV-p53 gene	Phase I|Phase II	2006
Hematologic Malignancy|Solid Tumor	Drug: Voraxaze|Drug: Placebo	Phase I|Phase II	2007
liver cancer	Drug: MB07133	Phase I|Phase II	2003
liver cancer|Liver Cancer	Drug: PHY906|Drug: capecitabine	Phase I|Phase II	2003
Hormone Refractory Prostate Cancer	Drug: AT-101	Phase I|Phase II	2005
skin cancer|skin cancer (Skin)	Drug: aldesleukin|Drug: ipilimumab	Phase I|Phase II	2003
Kidney Cancer	Drug: cyclosporine|Drug: filgrastim|Drug: pentostatin|Procedure: leukemiaogeneic bone marrow transplantation|Procedure: peripheral blood stem cell transplantation	Phase I|Phase II	2000
Kidney Cancer	Drug: fluorouracil|Drug: suramin	Phase I|Phase II	2004
Kidney|Cancer	Drug: 5-Flourouracil, Interferon-a, IL-2 and Thalidomide	Phase I|Phase II	2000
Leukemia	Drug: busulfan|Drug: cyclophosphamide|Drug: cyclosporine|Drug: cytarabine|Drug: filgrastim|Drug: idarubicin|Drug: recombinant interferon gamma|Procedure: peripheral blood stem cell transplantation	Phase I|Phase II	1996
Leukemia	Drug: aldesleukin|Drug: busulfan|Drug: cytarabine|Drug: daunorubicin hydrochloride|Drug: etoposide|Drug: filgrastim|Drug: valspodar|Procedure: bone marrow ablation with stem cell support|Procedure: peripheral blood stem cell transplantation	Phase I|Phase II	1997
Leukemia	Drug: DTGM fusion protein	Phase I|Phase II	1999
Leukemia	Drug: cytarabine|Drug: imatinib mesylate	Phase I|Phase II	2001
Leukemia	Drug: daunorubicin hydrochloride|Drug: imatinib mesylate|Drug: prednisone|Drug: vincristine sulfate	Phase I|Phase II	2001
Leukemia	Drug: cyclosporine|Drug: cytarabine|Drug: fludarabine phosphate|Drug: methotrexate|Drug: mycophenolate mofetil|Drug: therapeutic leukemiaogeneic lymphocytes|Procedure: leukemiaogeneic bone marrow transplantation|Procedure: peripheral blood stem cell transplantation|Procedure: radiation therapy	Phase I|Phase II	2001
Leukemia	Drug: arsenic trioxide|Drug: imatinib mesylate	Phase I|Phase II	2003
Leukemia	Drug: imatinib mesylate|Procedure: adjuvant therapy	Phase I|Phase II	2004
Leukemia	Drug: everolimus|Drug: imatinib mesylate	Phase I|Phase II	2004
Leukemia	Drug: cyclosporine|Drug: fludarabine phosphate|Drug: mycophenolate mofetil|Procedure: peripheral blood stem cell transplantation|Procedure: radiation therapy	Phase I|Phase II	2005
Leukemia, Lymphocytic, Chronic	Drug: SGN-40 (anti-huCD40 mAb)	Phase I|Phase II	2005
Leukemia, Lymphocytic|Lymphoma	Drug: BCX-1777	Phase I|Phase II	2001
Leukemia|Lymphoma	Drug: monoclonal antibody CD19|Drug: monoclonal antibody CD20|Procedure: in vitro-treated peripheral blood stem cell transplantation	Phase I|Phase II	1999
Leukemia|Lymphoma	Drug: laromustine	Phase I|Phase II	2005
Leukemia|Lymphoma|myeloma and Plasma Cell Neoplasm|Myelodysplastic Syndromes|Myelodysplastic/Myeloproliferative Diseases	Drug: alemtuzumab|Drug: cyclosporine|Drug: fludarabine phosphate|Drug: melphalan|Drug: mycophenolate mofetil|Drug: sargramostim|Drug: therapeutic leukemiaogeneic lymphocytes|Procedure: peripheral blood stem cell transplantation|Procedure: radiation therapy	Phase I|Phase II	2006
Leukemia|Lymphoma|myeloma and Plasma Cell Neoplasm|Precancerous/NonCondition	Drug: omega-3 fatty acids	Phase I|Phase II	1995
Leukemia|Lymphoma|TumLysis Syndrome	Drug: Rasburicase	Phase I|Phase II	2006
Leukemia|Mantle Cell Lymphoma|Myelofibrosis	Drug: RAD001	Phase I|Phase II	2004
Leukemia|Myelodysplastic Syndromes	Drug: liposomal daunorubicin citrate|Drug: semaxanib	Phase I|Phase II	2000
Leukemia|Myelodysplastic Syndromes	Drug: Decitabine|Drug: Valproic acid	Phase I|Phase II	2004
Leukemia|Myelodysplastic Syndromes|Myelodysplastic/Myeloproliferative Diseases	Drug: PR1 leukemia peptide vaccine|Drug: incomplete Freund's adjuvant|Drug: sargramostim	Phase I|Phase II	1999
Leukemia|Myelodysplastic Syndromes|Myelodysplastic/Myeloproliferative Diseases	Drug: bevacizumab	Phase I|Phase II	2001
Leukemia|Myelodysplastic Syndromes|Myelodysplastic/Myeloproliferative Diseases	Drug: arsenic trioxide|Drug: etanercept	Phase I|Phase II	2004
Leukemia|Myelodysplastic/Myeloproliferative Diseases	Drug: tipifarnib	Phase I|Phase II	2000
Lung Cancer	Drug: cisplatin|Drug: docetaxel|Drug: gemcitabine hydrochloride	Phase I|Phase II	1997
Lung Cancer	Drug: cisplatin|Drug: gemcitabine hydrochloride|Procedure: radiation therapy	Phase I|Phase II	1998
Lung Cancer	Drug: carboplatin|Drug: etoposide|Drug: ifosfamide|Drug: topotecan hydrochloride|Procedure: radiation therapy	Phase I|Phase II	2000
Lung Cancer	Drug: cisplatin|Drug: gemcitabine hydrochloride|Drug: paclitaxel|Procedure: radiation therapy	Phase I|Phase II	2000
Lung Cancer	Drug: gemcitabine hydrochloride|Drug: paclitaxel	Phase I|Phase II	2000
Lung Cancer	Drug: Avastin|Drug: Tarceva	Phase I|Phase II	2002
Lung Cancer	Drug: celecoxib|Drug: docetaxel|Drug: irinotecan hydrochloride	Phase I|Phase II	2003
Lung Cancer	Drug: Bevacizumab|Drug: Bortezomib	Phase I|Phase II	2006
Lung Cancer|Unspecified Adult Solid Tumor, Protocol Specific	Drug: bortezomib|Drug: pemetrexed disodium|Procedure: flow cytometry|Procedure: gene expression analysis|Procedure: immunoenzyme technique|Procedure: immunohistochemistry staining method|Procedure: mutation analysis|Procedure: protein expression analysis|Procedure: reverse transcriptase-polymerase chain reaction	Phase I|Phase II	2005
Lung Cancer|Unspecified Adult Solid Tumor, Protocol Specific	Drug: erlotinib hydrochloride|Drug: pemetrexed disodium	Phase I|Phase II	2005
Lung Neoplasms	Drug: CP-547,632	Phase I|Phase II	2002
Lung Neoplasms	Drug: pemetrexed|Drug: gemcitabine	Phase I|Phase II	2003
Lymphoma	Drug: busulfan|Drug: cyclophosphamide|Drug: etoposide|Procedure: leukemiaogeneic bone marrow transplantation|Procedure: bone marrow ablation with stem cell support|Procedure: peripheral blood stem cell transplantation|Procedure: radiation therapy	Phase I|Phase II	1999
Lymphoma	Drug: gemcitabine hydrochloride|Drug: pegylated liposomal doxorubicin hydrochloride|Drug: vinorelbine ditartrate	Phase I|Phase II	2000
Lymphoma	Drug: rituximab|Drug: yttrium Y 90 ibritumomab tiuxetan	Phase I|Phase II	2002
Lymphoma	Drug: aldesleukin|Drug: recombinant interleukin-12	Phase I|Phase II	2002
Lymphoma	Drug: bortezomib|Drug: cyclophosphamide|Drug: doxorubicin hydrochloride|Drug: etoposide|Drug: prednisone|Drug: vincristine sulfate	Phase I|Phase II	2003
Lymphoma	Drug: forodesine hydrochloride	Phase I|Phase II	2003
Lymphoma	Drug: oblimersen	Phase I|Phase II	2003
Lymphoma	Drug: fludarabine phosphate|Drug: rituximab|Drug: romidepsin	Phase I|Phase II	2004
Lymphoma	Drug: carboplatin|Drug: etoposide|Drug: filgrastim|Drug: ifosfamide|Drug: oblimersen|Drug: pegfilgrastim|Drug: rituximab	Phase I|Phase II	2004
Lymphoma	Drug: bortezomib|Drug: rituximab|Drug: yttrium Y 90 ibritumomab tiuxetan	Phase I|Phase II	2006
Lymphoma, T-Cell, Cutaneous	Drug: CPG 7909	Phase I|Phase II	2002
skin cancer	Drug: imexon|Drug: DTIC	Phase I|Phase II	2005
skin cancer	Drug: PI-88	Phase I|Phase II	2001
skin cancer	Drug: STA-4783|Drug: Paclitaxel	Phase I|Phase II	2004
skin cancer (Skin)	Drug: MART-1 antigen|Drug: recombinant MAGE-3.1 antigen|Drug: recombinant interleukin-12	Phase I|Phase II	1997
skin cancer (Skin)	Drug: MART-1 antigen|Drug: aldesleukin|Drug: gp100 antigen	Phase I|Phase II	1997
skin cancer (Skin)	Drug: aldesleukin|Drug: gp100 antigen|Drug: tyrosinase peptide	Phase I|Phase II	1997
skin cancer (Skin)	Drug: Detox-B adjuvant|Drug: verteporfin	Phase I|Phase II	2000
skin cancer (Skin)	Drug: aldesleukin|Drug: cyclophosphamide|Drug: filgrastim|Drug: fludarabine phosphate|Drug: incomplete Freund's adjuvant|Drug: interleukin-2 gene|Drug: therapeutic tuminfiltrating lymphocytes	Phase I|Phase II	2003
Metastases, Neoplasm|Colorectal Neoplasms|Esophageal Neoplasms|Stomach Neoplasms|Pancreatic Neoplasms|Breast Neoplasms|skin cancer|Sarcoma|Gastrointestinal Neoplasms|Lung Neoplasms|Liver Neoplasms|CholangioCancer	Drug: MTC-DOX fInjection|Procedure: Chemotherapy	Phase I|Phase II	2001
Cancer|Sarcoma	Drug: holmium Ho 166 DOTMP|Procedure: peripheral blood stem cell transplantation	Phase I|Phase II	2001
myeloma	Drug: Thalidomide	Phase I|Phase II	1998
myeloma	Drug: Atiprimod	Phase I|Phase II	2004
myeloma	Drug: imexon	Phase I|Phase II	2005
myeloma and Plasma Cell Neoplasm	Drug: arsenic trioxide|Drug: ascorbic acid	Phase I|Phase II	2000
myeloma and Plasma Cell Neoplasm	Drug: bortezomib|Drug: tipifarnib	Phase I|Phase II	2006
myeloma and Plasma Cell Neoplasm	Drug: fluphenazine hydrochloride	Phase I|Phase II	2006
myeloma|Stem Cell Transplantation	Drug: Arsenic Trioxide|Drug: Melphalan|Drug: Ascorbic Acid	Phase I|Phase II	2004
Myelodysplastic Disorders|Leukemia|myeloma|Plasma Cell Dyscrasia|Lymphoproliferative Disorders	Drug: FLUDARABINE|Drug: CAMPATH 1H|Drug: FK50|Procedure: Stem Cell Collection and Infusion	Phase I|Phase II	2000
Myelodysplastic Syndrome	Drug: Arsenic Trioxide (Tricenox)|Drug: Cytarabine	Phase I|Phase II	2003
Myelodysplastic Syndrome (MDS)	Drug: Ezatiostat Hydrochlorine	Phase I|Phase II	2006
Myelodysplastic Syndrome|leukemia	Drug: MGCD0103	Phase I|Phase II	2006
Myelodysplastic Syndromes	Drug: TLK199 HCl Liposomes fInjection	Phase I|Phase II	2002
Neoplasm Metastasis|Disease	Drug: CPG 7909	Phase I|Phase II	2002
lymphoma	Drug: IDEC-114	Phase I|Phase II	2002
lymphoma	Drug: IDEC-114	Phase I|Phase II	2002
lymphoma	Drug: Iodine I 131 Tositumomab	Phase I|Phase II	2003
lymphoma	Drug: hA20-humanized anti-CD20 antibody	Phase I|Phase II	2004
lung cancer	Drug: Pemetrexed|Drug: Cetuximab	Phase I|Phase II	2005
lung cancer	Drug: Exisulind	Phase I|Phase II	2001
Ovarian Cancer	Drug: aldesleukin|Drug: incomplete Freund's adjuvant|Drug: p53 peptide vaccine|Drug: sargramostim|Drug: therapeutic autologous dendritic cells|Procedure: in vitro-treated peripheral blood stem cell transplantation	Phase I|Phase II	2000
Ovarian Cancer	Drug: CC-5013|Drug: topotecan	Phase I|Phase II	2005
Ovarian Cancer|Epithelial Ovarian Cancer|Fleukemiaopian Tube Cancer	Drug: belinostat|Drug: Paclitaxel|Drug: Carboplatin	Phase I|Phase II	2005
Ovarian Neoplasms	Drug: TLK286	Phase I|Phase II	2002
Ovarian Neoplasms	Drug: TLK286	Phase I|Phase II	2003
Pain|Bladder Cancer|Breast Cancer|CNS Cancer|Colorectal cancer|esophagus cancer|Pancreatic Cancer|Prostate Cancer|Uterine Cancer|Head and Neck Cancer|Eye Cancer|Otorhinolaryngologic Neoplasms	Drug: d-Methadone|Drug: d-Methadone|Drug: d-Methadone|Drug: D-methadone|Drug: placebo	Phase I|Phase II	2004
Pancreatic Cancer	Drug: gemcitabine hydrochloride|Drug: imatinib mesylate	Phase I|Phase II	2005
Pancreatic Cancer	Drug: Romidepsin (Depsipeptide)/Gemcitabine	Phase I|Phase II	2006
Pancreatic Neoplasms	Drug: hMN14 (labetuzumab)	Phase I|Phase II	2000
Prostate Cancer	Drug: aldesleukin|Drug: recombinant interferon gamma|Procedure: gene-modified tumcell vaccine therapy	Phase I|Phase II	1995
Prostate Cancer	Drug: PSA RNA-pulsed dendritic cell vaccine	Phase I|Phase II	1999
Prostate Cancer	Drug: estramustine phosphate sodium|Drug: ixabepilone	Phase I|Phase II	2001
Prostate Cancer	Drug: docetaxel|Drug: IL2	Phase I|Phase II	2002
Prostate Cancer	Drug: Amonafide L-malate (drug)	Phase I|Phase II	2004
Prostatic Neoplasms	Drug: VELCADE TM (bortezomib) fInjection	Phase I|Phase II	2002
Prostatic Neoplasms	Drug: MLN2704 (DM1 conjugated monoclonal antibody MLN591)	Phase I|Phase II	2003
Prostatic Neoplasms	Drug: CP-675,206 and leuprolide acetate and bicalutamide|Drug: leuprolide acetate and bicalutamide	Phase I|Phase II	2004
kidney cancer|Post Nephrectomy	Drug: CPG 7909	Phase I|Phase II	2002
Respiratory Distress Syndrome, Adult|Bronchiolitis Obliterans|Pneumonia	Drug: etanercept	Phase I|Phase II	2001
Sarcoma	Drug: BMS-275291	Phase I|Phase II	2001
Sarcoma	Drug: dacarbazine|Drug: doxorubicin hydrochloride|Drug: filgrastim|Drug: ifosfamide|Drug: semaxanib|Procedure: conventional surgery|Procedure: radiation therapy	Phase I|Phase II	2001
Sarcoma	Drug: semaxanib|Procedure: conventional surgery|Procedure: radiation therapy	Phase I|Phase II	2001
Sciatica	Drug: epidural injection of etanercept|Drug: control procedure	Phase I|Phase II	2006
Sickle Cell Anemia	Drug: cyclosporine|Drug: fludarabine|Drug: mycophenolate mofetil|Procedure: Bone Marrow Transplantation	Phase I|Phase II	1999
skin cancer|Cancer of Head and/Neck	Drug: Taxotere|Drug: Cisplatin|Drug: 5-Fluorouracil|Drug: Leucovorin	Phase I|Phase II	1997
Stage IIIB lung cancer|Stage IV lung cancer	Drug: Paclitaxel|Drug: Carboplatin|Drug: STA 4783	Phase I|Phase II	2004
Stage IV skin cancer	Drug: Disulfiram	Phase I|Phase II	2002
Treatment-Related Cancer	Drug: Clonidine	Phase I|Phase II	2003
Tumors	Drug: NB1011	Phase I|Phase II	2005
Tumors	Drug: MGCD0103|Drug: Gemcitabine	Phase I|Phase II	2006
Tumors|Neoplasm Metastasis	Drug: PTK787/ZK 222584 (vatalanib)	Phase I|Phase II	2002
Unresectable Stage III IV skin cancer	Drug: Ipilimumab|Drug: Ipilimumab	Phase I|Phase II	2005
Unspecified Adult Solid Tumor, Protocol Specific	Drug: sargramostim|Procedure: radiation therapy	Phase I|Phase II	2004
Uterine Cervical Cancer	Drug: Gemcitabine	Phase I|Phase II	1999
5q Minus Syndrome|Myelodysplastic Syndrome	Drug: Leucovorin	Phase II	1998
Acquired Immunodeficiency Syndrome|Burning Mouth Syndrome|HIV Infection	Drug: Thalidomide	Phase II	1996
Acquired Immunodeficiency Syndrome|HIV Infection	Drug: IL-2 plus Anti-TNF Thalidomide	Phase II	1995
Acromegaly|Pituitary Neoplasm	Drug: Sandostatin LAR Depot versus transsphenoidal surgery	Phase II	1999
leukemia	Drug: cytosine arabinoside (ara-C)|Drug: daunomycin|Drug: interleukin-2	Phase II	1993
leukemia	Drug: Mylotarg (gemtuzumab ozogamicin) Injection	Phase II	2000
leukemia	Drug: clofarabine (IV formulation)	Phase II	2002
leukemia	Drug: cenersen sodium (EL625)|Drug: Idarubicin|Drug: Ara-C	Phase II	2004
leukemia|Graft Versus Host Disease|leukemia|leukemia|Myelodysplastic Syndromes|lymphoma|Hodgkin's Disease	Drug: sirolimus|Drug: tacrolimus	Phase II	2003
leukemia|Myelodysplastic Syndrome	Drug: leukemia-trans retinoic acid|Drug: Bryostatin 1	Phase II	1997
leukemia|Myelodysplastic Syndrome	Drug: Decitabine	Phase II	2005
leukemia	Drug: Amonafide L-Malate|Drug: Cytarabine	Phase II	2005
leukemia|Myelodysplastic Syndrome	Drug: Clofarabine|Drug: Clofarabine plus Ara-C	Phase II	2004
leukemia|Myelodysplastic Syndromes	Drug: PKC412, an inhibitof FLT3	Phase II	2004
AdenoCancer	Drug: Lapatinib (GW572016) oral tablets	Phase II	2005
stomach cancer|AdenoCancer of GE Junction|esophagus cancer	Drug: Doxorubicin|Drug: Cisplatin|Drug: 5-fluorouracil	Phase II	1998
AdenoCancer|lung cancer|Lung Neoplasms	Drug: Motexafin Gadolinium	Phase II	2005
Adrenal Cortical Cancer	Drug: doxorubicin, vincristine, and etoposide with mitotane	Phase II	1993
Adrenocortical Cancer|brain cancer|Childhood Germ Cell Tumor|Colorectal cancer|Extragonadal Germ Cell Tumor|Head and Neck Cancer|Kidney Cancer|Liver Cancer|Neuroblastoma|Ovarian Cancer|Sarcoma	Drug: oxaliplatin	Phase II	2004
breast cancer|Breast Cancer|breast cancer	Drug: larotaxel (XRP9881)|Drug: trastuzumab	Phase II	2006
breast cancer	Drug: Oral lapatinib tablets in combination with IV bevacizumab	Phase II	2007
Amenorrhea	Drug: DR-2021a|Drug: DR-2021b|Drug: DR-2021c|Drug: DR-2021d|Drug: DR-2021e|Other: Placebo	Phase II	2005
Amyloidosis	Drug: Melphalan|Procedure: Autologous Stem Cell Transplantation	Phase II	1999
Amyotrophic Lateral Sclerosis (ALS)	Drug: Tamoxifen	Phase II	2001
Anaplastic Large-Cell Lymphoma	Drug: SGN-30 (anti-CD30 mAb)	Phase II	2004
Anemia, Sickle Cell	Drug: ICL670|Drug: deferoxamine	Phase II	2003
Arachnoiditis	Drug: thalidomide	Phase II	2005
Asthma	Drug: TNFR:Fc	Phase II	1999
Asthma	Drug: Etanercept	Phase II	2005
Lymphoma|Lymphoma|Marginal Lymphoma	Drug: VELCADE and rituximab	Phase II	2004
Beta Thalassemia	Drug: 5-Azacytidine	Phase II	2000
Beta-Thalassemia	Drug: arginine butyrate|Drug: epoetin alfa	Phase II	1999
Beta-Thalassemia|Myelodysplastic Syndromes|Fanconi Syndrome|Anemia, Diamond-Blackfan|Anemia, Aplastic	Drug: Deferasirox	Phase II	2003
Bladder Cancer	Drug: BCG vaccine|Drug: valrubicin|Procedure: conventional surgery	Phase II	1998
Bladder Cancer	Drug: BCG vaccine|Drug: recombinant interferon alfa	Phase II	1999
Bladder Cancer	Drug: tipifarnib	Phase II	2002
Bladder Cancer|Breast Cancer|Head and Neck Cancer|Lung Cancer|Unspecified Adult Solid Tumor, Protocol Specific	Drug: docetaxel	Phase II	1998
Bladder Cancer|Transitional Cell Cancer of the Renal Pelvis and Ureter	Drug: carboplatin|Drug: filgrastim|Drug: gemcitabine hydrochloride|Drug: ifosfamide|Drug: paclitaxel|Procedure: adjuvant therapy	Phase II	2001
Bladder Cancer|Transitional Cell Cancer of the Renal Pelvis and Ureter	Drug: bortezomib	Phase II	2003
Bladder Cancer|Transitional Cell Cancer of the Renal Pelvis and Ureter|Urethral Cancer	Drug: carboplatin|Drug: gemcitabine hydrochloride|Drug: paclitaxel|Drug: trastuzumab	Phase II	2000
Bladder Cancer|Transitional Cell Cancer of the Renal Pelvis and Ureter|Urethral Cancer	Drug: ixabepilone	Phase II	2001
Bladder Cancer|Transitional Cell Cancer of the Renal Pelvis and Ureter|Urethral Cancer	Drug: cisplatin|Drug: doxorubicin hydrochloride|Drug: filgrastim|Drug: gemcitabine hydrochloride|Drug: ifosfamide|Procedure: conventional surgery|Procedure: neoadjuvant therapy	Phase II	2001
Bladder Cancer|Urethral Cancer	Drug: carboplatin|Drug: cisplatin|Drug: gemcitabine hydrochloride|Drug: paclitaxel|Procedure: neoadjuvant therapy|Procedure: radiation therapy	Phase II	2002
Bladder Neoplasms|Ureteral Neoplasms|Urethral Neoplasms|Cancer, Transitional Cell	Drug: TOCOSOL Paclitaxel	Phase II	2003
Bone Marrow Ablation|Childhood Germ Cell Tumor|Extragonadal Germ Cell Tumor|Head and Neck Cancer|Kidney Cancer|Liver Cancer|Lymphoma|Neuroblastoma|Ovarian Cancer|eye cancer|Sarcoma|Testicular cancer	Drug: carboplatin|Drug: filgrastim|Drug: thiotepa|Drug: topotecan hydrochloride|Procedure: autologous bone marrow transplantation|Procedure: bone marrow ablation with stem cell support|Procedure: in vitro-treated bone marrow transplantation	Phase II	1992
Bone Marrow Ablation|Leukemia	Drug: etoposide|Drug: filgrastim|Procedure: low-LET electron therapy|Procedure: low-LET photon therapy|Procedure: peripheral blood stem cell transplantation	Phase II	1994
brain cancer	Drug: cyclophosphamide|Drug: melphalan|Drug: sargramostim|Procedure: autologous bone marrow transplantation|Procedure: bone marrow ablation with stem cell support|Procedure: peripheral blood stem cell transplantation	Phase II	1994
brain cancer	Drug: suramin|Procedure: chemotherapy	Phase II	1995
brain cancer	Drug: lomustine|Drug: procarbazine hydrochloride|Drug: vincristine sulfate|Procedure: low-LET photon therapy	Phase II	1996
brain cancer	Drug: amifostine trihydrate|Drug: cisplatin|Drug: cyclophosphamide|Drug: filgrastim|Drug: vincristine sulfate|Procedure: peripheral blood stem cell transplantation|Procedure: radiation therapy	Phase II	1996
brain cancer	Drug: cyclophosphamide|Drug: filgrastim|Drug: sargramostim|Drug: thiotepa|Procedure: autologous bone marrow transplantation|Procedure: bone marrow ablation with stem cell support|Procedure: peripheral blood stem cell transplantation	Phase II	1997
brain cancer	Drug: cisplatin|Drug: cyclophosphamide|Drug: etoposide|Drug: filgrastim|Drug: methotrexate|Drug: vincristine sulfate|Procedure: adjuvant therapy|Procedure: radiation therapy	Phase II	1997
brain cancer	Drug: carboplatin|Drug: lobradimil	Phase II	1998
brain cancer	Drug: temozolomide	Phase II	1998
brain cancer	Drug: phenylacetate	Phase II	1998
brain cancer	Drug: cisplatin|Drug: cyclophosphamide|Drug: etoposide|Drug: filgrastim|Drug: vincristine sulfate|Procedure: radiation therapy	Phase II	1998
brain cancer	Drug: aldesleukin|Drug: therapeutic autologous lymphocytes|Procedure: adjuvant therapy|Procedure: conventional surgery	Phase II	1999
brain cancer	Drug: carmustine|Drug: cisplatin|Drug: etoposide|Procedure: radiation therapy	Phase II	1999
brain cancer	Drug: iodine I 125|Procedure: brachytherapy|Procedure: intraoperative radiation therapy|Procedure: surgical procedure	Phase II	1999
brain cancer	Drug: carmustine|Drug: cisplatin|Drug: etoposide|Procedure: chemotherapy|Procedure: radiation therapy	Phase II	1999
brain cancer	Drug: iodine I 131 monoclonal antibody TNT-1/B|Procedure: conventional surgery	Phase II	2000
brain cancer	Drug: carboplatin|Drug: pyrazoloacridine	Phase II	2000
brain cancer	Drug: temozolomide|Drug: thalidomide	Phase II	2000
brain cancer	Drug: O6-benzylguanine|Drug: carmustine	Phase II	2000
brain cancer	Drug: tipifarnib	Phase II	2000
brain cancer	Drug: fenretinide	Phase II	2000
brain cancer	Drug: tamoxifen citrate|Procedure: radiation therapy	Phase II	2000
brain cancer	Drug: gefitinib	Phase II	2001
brain cancer	Drug: interleukin-4 PE38KDEL cytotoxin|Procedure: conventional surgery	Phase II	2001
brain cancer	Drug: temsirolimus	Phase II	2001
brain cancer	Drug: dalteparin|Procedure: radiation therapy	Phase II	2002
brain cancer	Drug: oxaliplatin	Phase II	2002
brain cancer	Drug: poly ICLC|Procedure: radiation therapy	Phase II	2002
brain cancer	Drug: temozolomide|Procedure: adjuvant therapy|Procedure: radiation therapy	Phase II	2002
brain cancer	Drug: imatinib mesylate	Phase II	2003
brain cancer	Drug: tipifarnib	Phase II	2003
brain cancer	Drug: fenretinide|Procedure: adjuvant therapy|Procedure: conventional surgery|Procedure: neoadjuvant therapy	Phase II	2003
brain cancer	Drug: procarbazine hydrochloride|Drug: thalidomide	Phase II	2004
brain cancer	Drug: lapatinib ditosylate|Procedure: adjuvant therapy|Procedure: conventional surgery|Procedure: neoadjuvant therapy	Phase II	2005
brain cancer	Drug: cilengitide|Procedure: conventional surgery	Phase II	2005
brain cancer	Drug: cediranib maleate	Phase II	2005
brain cancer	Drug: pazopanib hydrochloride	Phase II	2007
brain cancer|Breast Cancer	Drug: PEG-interferon alfa-2a|Drug: capecitabine	Phase II	2005
brain cancer|Cancer-Related Problem/Condition	Drug: EGb761|Drug: donepezil hydrochloride|Procedure: cognitive assessment	Phase II	2004
brain cancer|Cancer-Related Problem/Condition|Leukemia|Lymphoma|Myelodysplastic Syndromes|Myelodysplastic/Myeloproliferative Diseases|Unspecified Childhood Solid Tumor, Protocol Specific	Drug: cyproheptadine hydrochloride|Drug: megestrol acetate	Phase II	2003
brain cancer|Cancer-Related Problem/Condition|Unspecified Adult Solid Tumor, Protocol Specific	Drug: therapeutic melatonin|Procedure: radiation therapy	Phase II	2002
brain cancer|Extragonadal Germ Cell Tumor|Ovarian Cancer|Testicular cancer	Drug: ixabepilone	Phase II	2003
brain cancer|Head and Neck Cancer|Lymphoma	Drug: carmustine|Drug: cisplatin|Drug: cyclophosphamide|Drug: etoposide|Drug: filgrastim|Drug: thiotepa|Procedure: adjuvant therapy|Procedure: autologous bone marrow transplantation|Procedure: bone marrow ablation with stem cell support|Procedure: peripheral blood stem cell transplantation	Phase II	1999
brain cancer|Kidney Cancer	Drug: sorafenib tosylate	Phase II	2005
brain cancer|Leukemia|Lymphoma|Cancer|Unspecified Childhood Solid Tumor, Protocol Specific	Drug: topotecan hydrochloride	Phase II	2000
brain cancer|Lymphoma|Neuroblastoma|eye cancer|Sarcoma|Unspecified Childhood Solid Tumor, Protocol Specific	Drug: becatecarin	Phase II	2000
brain cancer|skin cancer (Skin)	Drug: temozolomide|Drug: thalidomide	Phase II	2003
brain cancer|Neuroblastoma	Drug: carboplatin|Drug: cisplatin|Drug: cyclophosphamide|Drug: filgrastim|Drug: vincristine sulfate|Procedure: adjuvant therapy|Procedure: radiation therapy	Phase II	1998
brain cancer|Neuroblastoma|Sarcoma	Drug: vinorelbine ditartrate	Phase II	1998
brain cancer|Neuroblastoma|Sarcoma|Unspecified Childhood Solid Tumor, Protocol Specific	Drug: irinotecan hydrochloride	Phase II	1999
brain cancer|Unspecified Adult Solid Tumor, Protocol Specific	Drug: polifeprosan 20 with carmustine implant|Procedure: conventional surgery	Phase II	2002
brain cancer|Unspecified Adult Solid Tumor, Protocol Specific	Drug: temozolomide|Drug: thalidomide|Procedure: radiation therapy	Phase II	2004
Brain Neoplasms|Neoplasms, Brain|brain cancer	Drug: Karenitecin (BNP1350)	Phase II	2001
Brain Tumor	Drug: Phenylbutyrate	Phase II	2000
Breast Cancer	Drug: pyrazoloacridine	Phase II	1994
Breast Cancer	Drug: paclitaxel|Drug: valspodar	Phase II	1997
Breast Cancer	Drug: pyrazoloacridine	Phase II	1997
Breast Cancer	Drug: cisplatin|Drug: gemcitabine hydrochloride	Phase II	1997
Breast Cancer	Drug: Fludarabine|Drug: Melphalan|Procedure: Stem Cell Infusion	Phase II	1998
Breast Cancer	Drug: bryostatin 1	Phase II	1998
Breast Cancer	Drug: ISIS 3521|Drug: ISIS 5132	Phase II	1998
Breast Cancer	Drug: perillyl alcohol	Phase II	1998
Breast Cancer	Drug: cyclophosphamide|Drug: docetaxel|Drug: doxorubicin hydrochloride	Phase II	1998
Breast Cancer	Drug: irinotecan hydrochloride	Phase II	1998
Breast Cancer	Drug: raloxifene|Procedure: evaluation of cancer risk factors	Phase II	1998
Breast Cancer	Drug: Taxotere	Phase II	1999
Breast Cancer	Drug: irofulven	Phase II	1999
Breast Cancer	Drug: exatecan mesylate	Phase II	1999
Breast Cancer	Drug: rubitecan	Phase II	1999
Breast Cancer	Drug: anastrozole|Drug: carboplatin|Drug: cisplatin|Drug: cyclophosphamide|Drug: etoposide|Drug: filgrastim|Drug: thiotepa|Procedure: peripheral blood stem cell transplantation|Procedure: radiation therapy	Phase II	1999
Breast Cancer	Drug: irinotecan hydrochloride	Phase II	1999
Breast Cancer	Drug: venlafaxine	Phase II	2000
Breast Cancer	Drug: Tamoxifen	Phase II	2000
Breast Cancer	Drug: Zoledronate	Phase II	2000
Breast Cancer	Drug: gemcitabine hydrochloride|Drug: pegylated liposomal doxorubicin hydrochloride	Phase II	2000
Breast Cancer	Drug: anastrozole|Drug: capecitabine|Drug: cyclophosphamide|Drug: docetaxel|Drug: doxorubicin hydrochloride|Drug: exemestane|Drug: letrozole|Drug: tamoxifen citrate|Procedure: conventional surgery|Procedure: gene expression profiling|Procedure: laboratory biomarker analysis|Procedure: proteomic profiling|Procedure: radiation therapy|Procedure: reverse transcriptase-polymerase chain reaction|Proce…	Phase II	2000
Breast Cancer	Drug: becatecarin	Phase II	2000
Breast Cancer	Drug: celecoxib|Drug: trastuzumab	Phase II	2000
Breast Cancer	Drug: cyclophosphamide|Drug: cyclosporine|Drug: filgrastim|Drug: fludarabine phosphate|Drug: therapeutic leukemiaogeneic lymphocytes|Procedure: peripheral blood stem cell transplantation	Phase II	2000
Breast Cancer	Drug: gemcitabine hydrochloride|Drug: pemetrexed disodium	Phase II	2000
Breast Cancer	Drug: bevacizumab|Drug: vinorelbine ditartrate	Phase II	2001
Breast Cancer	Drug: bevacizumab|Drug: docetaxel|Drug: doxorubicin hydrochloride|Drug: filgrastim|Drug: pegfilgrastim|Procedure: conventional surgery	Phase II	2001
Breast Cancer	Drug: docetaxel|Drug: filgrastim|Drug: vinorelbine ditartrate	Phase II	2001
Breast Cancer	Drug: bortezomib	Phase II	2001
Breast Cancer	Drug: erlotinib hydrochloride	Phase II	2001
Breast Cancer	Drug: vinorelbine ditartrate	Phase II	2001
Breast Cancer	Drug: ABT-751	Phase II	2002
Breast Cancer	Drug: bortezomib	Phase II	2002
Breast Cancer	Drug: Ad5CMV-p53 gene|Drug: docetaxel|Drug: doxorubicin hydrochloride|Procedure: conventional surgery|Procedure: neoadjuvant therapy	Phase II	2002
Breast Cancer	Drug: ixabepilone	Phase II	2002
Breast Cancer	Drug: bevacizumab|Drug: docetaxel	Phase II	2002
Breast Cancer	Drug: exemestane|Drug: trastuzumab	Phase II	2002
Breast Cancer	Drug: imatinib mesylate	Phase II	2002
Breast Cancer	Drug: anastrozole|Drug: gefitinib	Phase II	2002
Breast Cancer	Drug: cyclophosphamide|Drug: doxorubicin hydrochloride|Drug: paclitaxel|Drug: recombinant fowlpox-CEA(6D)/TRICOM vaccine|Drug: recombinant vaccinia-CEA(6D)-TRICOM vaccine|Drug: sargramostim|Procedure: radiation therapy	Phase II	2002
Breast Cancer	Drug: tamoxifen citrate|Drug: tipifarnib	Phase II	2002
Breast Cancer	Drug: docetaxel & capecitabine	Phase II	2003
Breast Cancer	Drug: Gefitinib|Drug: Anastrozole	Phase II	2003
Breast Cancer	Drug: celecoxib	Phase II	2003
Breast Cancer	Drug: cyclophosphamide|Drug: doxorubicin hydrochloride|Drug: filgrastim|Drug: tipifarnib|Procedure: conventional surgery	Phase II	2003
Breast Cancer	Drug: anti-thymocyte globulin|Drug: cyclosporine|Drug: filgrastim|Drug: fludarabine phosphate|Drug: melphalan|Drug: methotrexate|Drug: therapeutic leukemiaogeneic lymphocytes|Procedure: graft-versus-tuminduction therapy|Procedure: peripheral blood stem cell transplantation	Phase II	2003
Breast Cancer	Drug: amonafide dihydrochloride	Phase II	2003
Breast Cancer	Drug: tamoxifen citrate|Procedure: breast duct lavage|Procedure: cytogenetic analysis|Procedure: cytology specimen collection procedure|Procedure: laboratory biomarker analysis|Procedure: protein expression analysis	Phase II	2003
Breast Cancer	Drug: Gemcitabine|Drug: Carboplatin|Drug: Herceptin	Phase II	2004
Breast Cancer	Drug: XRP9881	Phase II	2004
Breast Cancer	Drug: Fulvestrant	Phase II	2004
Breast Cancer	Drug: Fulvestrant	Phase II	2004
Breast Cancer	Drug: Reduced glutathione	Phase II	2004
Breast Cancer	Drug: Ispinesib	Phase II	2004
Breast Cancer	Drug: anastrozole|Drug: lonafarnib	Phase II	2004
Breast Cancer	Drug: Zometa(drug)	Phase II	2004
Breast Cancer	Drug: celecoxib|Drug: placebo	Phase II	2004
Breast Cancer	Drug: gemcitabine hydrochloride|Drug: triapine	Phase II	2004
Breast Cancer	Drug: Letrozole in combination with Bevacizumab	Phase II	2005
Breast Cancer	Drug: lapatinib	Phase II	2005
Breast Cancer	Drug: carboplatin, docetaxel, herceptin	Phase II	2005
Breast Cancer	Drug: Gemcitabine|Drug: Trastuzumab|Drug: Cisplatin	Phase II	2005
Breast Cancer	Drug: romidepsin	Phase II	2005
Breast Cancer	Drug: carboplatin|Drug: docetaxel|Drug: trastuzumab|Procedure: adjuvant therapy|Procedure: conventional surgery|Procedure: neoadjuvant therapy	Phase II	2005
Breast Cancer	Drug: vorinostat	Phase II	2005
Breast Cancer	Drug: anastrozole|Drug: goserelin	Phase II	2005
Breast Cancer	Drug: ferumoxtran-10|Procedure: magnetic resonance imaging|Procedure: sentinel lymph node biopsy	Phase II	2005
Breast Cancer	Drug: MKC-1	Phase II	2006
Breast Cancer	Drug: enzastaurin|Drug: bevacizumab|Drug: paclitaxel|Drug: placebo	Phase II	2007
Breast Cancer|AdenoCancer	Drug: MDX-010	Phase II	2003
Breast Cancer|Breast Neoplasms	Drug: FLAC with GM-CSF	Phase II	1989
Breast Cancer|Breast Neoplasms	Drug: Adriamycin|Drug: cyclophosphamide|Drug: G-CSF|Drug: paclitaxel	Phase II	1994
Breast Cancer|Breast Neoplasms	Drug: methotrexate|Drug: leucovorin|Drug: 5-fluorouracil|Drug: cyclophosphamide|Procedure: peripheral blood progenitcell|Drug: paclitaxel|Drug: doxorubicin	Phase II	1996
Breast Cancer|Breast Neoplasms, Male|Cancer, Ductal	Drug: pemetrexed	Phase II	2005
Breast Cancer|Cancer of Breast|Cancer of the Breast|Breast Neoplasms	Drug: Pemetrexed|Drug: Gemcitabine	Phase II	2003
Breast Cancer|Cancer-Related Problem/Condition	Drug: triptorelin	Phase II	2004
Breast Cancer|Cancer-Related Problem/Condition	Drug: St. John's wort	Phase II	2006
Breast Cancer|Cancer-Related Problem/Condition|Lung Cancer|Ovarian Cancer|Prostate Cancer|Unspecified Adult Solid Tumor, Protocol Specific	Drug: amifostine trihydrate	Phase II	2004
Breast Cancer|Cervical Cancer|Colorectal cancer|Lung Cancer|Ovarian Cancer|Pancreatic Cancer	Drug: aldesleukin|Drug: mutant p53 peptide pulsed dendritic cell vaccine|Drug: ras peptide cancer vaccine|Drug: sargramostim|Drug: therapeutic autologous lymphocytes|Drug: therapeutic tuminfiltrating lymphocytes	Phase II	1996
Breast Cancer|Chronic Myeloproliferative Disorders|Gestational Trophoblastic Tumor|Graft Versus Host Disease|Leukemia|Lymphoma|myeloma and Plasma Cell Neoplasm|Myelodysplastic Syndromes|Myelodysplastic/Myeloproliferative Diseases|Neuroblastoma|Ovarian Cancer|Testicular cancer	Drug: alemtuzumab|Drug: methylprednisolone|Drug: prednisone|Procedure: flow cytometry|Procedure: immunologic technique|Procedure: pharmacological study	Phase II	2006
Breast Cancer|Colorectal cancer|Lung Cancer|Pancreatic Cancer	Drug: CI-1040	Phase II	2002
Breast Cancer|Lung Cancer|Prostate Cancer	Drug: docetaxel	Phase II	2002
Breast Cancer|Metastases	Drug: Ixabepilone	Phase II	2004
Breast Cancer|Metastasis	Drug: Dasatinib	Phase II	2006
Breast Cancer|breast cancer	Drug: CT-2103 (Xyotax)	Phase II	2004
Breast Cancer|Newly Diagnosed|ErbB2 Overexpressing|ErbB1 Expressing|Inflammatory	Drug: Lapatinib|Drug: Paclitaxel	Phase II	2005
Breast Cancer|Prostate Cancer	Drug: Soy Isoflavone Nutritional Supplements	Phase II	2000
Breast Cancer|sarcoma	Drug: Temozolomide	Phase II	2000
Breast Neoplasm	Drug: Docetaxel|Drug: Vinorelbine|Drug: Filgrastim	Phase II	1997
Breast Neoplasm	Drug: letrozole|Drug: everolimus	Phase II	2005
Breast Neoplasm|Neoplasm Metastasis	Drug: preoperative dose intense chemotherapy (FLAC/G-CSF)	Phase II	1989
Breast Neoplasms	Drug: CI-1033	Phase II	2002
Breast Neoplasms	Drug: THERATOPEÂ® vaccine	Phase II	2002
Breast Neoplasms	Drug: Celecoxib|Drug: Exemestane	Phase II	2002
Breast Neoplasms	Drug: ZD1839 in combination with docetaxel	Phase II	2003
Breast Neoplasms	Drug: Gemcitabine|Drug: Paclitaxel|Drug: Docetaxel	Phase II	2003
Breast Neoplasms	Drug: Gefitinib|Drug: Tamoxifen	Phase II	2003
Breast Neoplasms	Drug: Irinotecan	Phase II	2003
Breast Neoplasms	Drug: ET-743	Phase II	2003
Breast Neoplasms	Drug: SU011248	Phase II	2004
Breast Neoplasms	Drug: E7389	Phase II	2004
Breast Neoplasms	Drug: Nanoparticle albumin bound paclitaxel followed by FEC	Phase II	2005
Breast Neoplasms	Drug: Enzastaurin Hydrochloride	Phase II	2006
Breast Neoplasms	Drug: PTK787/ZK222584|Drug: Letrozole	Phase II	2006
Breast Neoplasms|Cancer of the Breast|Breast Cancer	Drug: Gemcitabine|Drug: Trastuzumab	Phase II	2002
Breast Neoplasms|Colonic Neoplasms|Lung Neoplasms|Pancreatic Neoplasms|Stomach Neoplasms	Drug: Rituximab	Phase II	1999
Breast Neoplasms|Metastases	Drug: E7070	Phase II	2004
Breast Neoplasms|Metastases, Neoplasm	Drug: ABI-007	Phase II	2001
Breast Neoplasms|Metastases, Neoplasm	Drug: Bay 59-8862	Phase II	2002
Breast Neoplasms|Metastases, Neoplasm	Drug: ZD6474	Phase II	2002
Breast Neoplasms|Neoplasm Metastasis	Drug: Edotecarin	Phase II	2003
Burkitt Lymphoma|Lymphoma, Large-Cell, Diffuse|Lymphoma, Smleukemia Noncleaved-Cell	Drug: granulocyte-macrophage colony stimulating fact(GM-CSF)	Phase II	1989
Cachexia	Drug: GTx-024|Drug: GTx-024|Drug: Placebo	Phase II	2007
Calcinosis	Drug: calcitonin	Phase II	1992
Cancer	Drug: Gefitinib	Phase II	2004
Cancer	Drug: Aprepitant vs. Gabapentin|Drug: Aprepitant vs. Gabapentin	Phase II	2004
Cancer	Drug: ARQ 501	Phase II	2006
Cancer	Drug: methotrexate|Drug: methylprednisolone|Drug: prednisone	Phase II	2006
Cancer|Bowel Dysfunction	Drug: alvimopan	Phase II	2004
Cancer|Breakthrough Pain	Drug: ACTIQÂ®	Phase II	2004
Cancer|Cancer Cachexia|Chronic Obstructive Pulmonary Disease|Chronic Heart Failure|Rheumatoid Arthritis	Drug: Fish oil supplement	Phase II	2004
Cancer|lung cancer	Drug: Nexavar (Sorafenib, BAY 43-9006)	Phase II	2004
Cancer|skin cancer	Drug: Nexavar (Sorafenib, BAY43-9006)|Drug: Placebo + Dacarbazine	Phase II	2005
Cancer|Prostate Neoplasms	Drug: Leuprolide goserelin|Drug: Transdermal estradiol	Phase II	2005
Cancer-Related Problem/Condition|Cervical Cancer|Endometrial Cancer|Fleukemiaopian Tube Cancer|Ovarian Cancer|Peritoneal Cavity Cancer|Sarcoma	Drug: amifostine trihydrate|Drug: cisplatin|Drug: paclitaxel	Phase II	1998
Cancer-Related Problem/Condition|Colorectal cancer|Extrahepatic Bile Duct Cancer|stomach cancer|Gastrointestinal Stromal Tumor|Nausea and Vomiting|Ovarian Cancer|Pancreatic Cancer|Peritoneal Cavity Cancer|Smleukemia Intestine Cancer	Drug: octreotide acetate	Phase II	1999
Cancer-Related Problem/Condition|Fatigue|Pain|Pancreatic Cancer	Drug: sargramostim plasmid DNA pancreatic tumcell vaccine	Phase II	2006
Cancer-Related Problem/Condition|Head and Neck Cancer	Drug: amifostine trihydrate|Drug: cisplatin|Procedure: radiation therapy	Phase II	1998
Cancer-Related Problem/Condition|Head and Neck Cancer	Drug: acetylsalicylic acid|Drug: alvocidib|Drug: clopidogrel bisulfate	Phase II	2000
Cancer-Related Problem/Condition|Kidney Cancer|Leukemia|Lymphoma|myeloma and Plasma Cell Neoplasm|Myelodysplastic Syndromes|Myelodysplastic/Myeloproliferative Diseases|Neuroblastoma|Sarcoma	Drug: voriconazole	Phase II	2003
Cancer-Related Problem/Condition|Leukemia|Lymphoma|myeloma and Plasma Cell Neoplasm	Drug: cyclophosphamide|Drug: etoposide|Drug: filgrastim|Drug: ifosfamide|Drug: palifermin|Procedure: quality-of-life assessment|Procedure: radiation therapy	Phase II	2000
Cancer-Related Problem/Condition|Leukemia|Myelodysplastic Syndromes|Myelodysplastic/Myeloproliferative Diseases	Drug: epoetin alfa|Drug: thalidomide	Phase II	2001
Cancer-Related Problem/Condition|Lung Cancer	Drug: amifostine trihydrate|Drug: carboplatin|Drug: paclitaxel|Procedure: radiation therapy	Phase II	1997
Cancer-Related Problem/Condition|Lung Cancer	Drug: methoxy polyethylene glycol epoetin beta	Phase II	2003
Cancer-Related Problem/Condition|Lung Cancer	Drug: cisplatin|Drug: darbepoetin alfa|Drug: dimesna|Drug: docetaxel|Drug: pegfilgrastim	Phase II	2006
Cancer-Related Problem/Condition|Lung Cancer	Drug: bevacizumab|Drug: carboplatin|Drug: paclitaxel|Procedure: chemoprotection|Procedure: management of therapy complications|Procedure: pulmonary complications management|Procedure: radiation therapy	Phase II	2006
Cancer-Related Problem/Condition|Lymphoma	Drug: denileukin diftitox|Drug: dexamethasone	Phase II	1999
Cancer-Related Problem/Condition|Pain|Unspecified Adult Solid Tumor, Protocol Specific	Drug: morphine sulfate|Procedure: quality-of-life assessment	Phase II	2001
Cancer-Related Problem/Condition|Sarcoma	Drug: amifostine trihydrate|Drug: cyclophosphamide|Drug: doxorubicin hydrochloride|Drug: etoposide|Drug: filgrastim|Drug: ifosfamide|Drug: topotecan hydrochloride|Drug: vincristine sulfate|Procedure: conventional surgery|Procedure: low-LET cobalt-60 gamma ray therapy|Procedure: low-LET electron therapy|Procedure: low-LET photon therapy	Phase II	1995
Cancer-Related Problem/Condition|Unspecified Adult Solid Tumor, Protocol Specific	Drug: recombinant interferon gamma|Drug: voriconazole	Phase II	2003
Cancer-Related Problem/Condition|Unspecified Adult Solid Tumor, Protocol Specific	Drug: daptomycin	Phase II	2006
Cancer-Related Problem/Condition|Unspecified Childhood Solid Tumor, Protocol Specific	Drug: dextroamphetamine-amphetamine|Drug: methylphenidate hydrochloride	Phase II	2003
Cancer of Unknown Primary|Neuroendocrine Cancer|Neuroendocrine Cancer of the Skin	Drug: irinotecan hydrochloride	Phase II	1999
Cancer of Unknown Primary|Pain	Drug: gemcitabine hydrochloride|Procedure: quality-of-life assessment	Phase II	2006
liver cancer	Drug: ADI-PEG 20	Phase II	2002
liver cancer	Drug: Nexavar (Sorafenib, BAY43-9006)	Phase II	2002
liver cancer	Drug: Sorafenib (Nexavar, BAY43-9006) plus Doxorubicin|Drug: Doxorubicin/Placebo	Phase II	2005
Cancer, Non Smleukemia Cell Lung	Drug: Gemcitabine|Drug: Carboplatin|Drug: Paclitaxel	Phase II	2001
Cancer, Non Smleukemia Cell Lung	Drug: gemcitabine|Drug: carboplatin|Drug: cisplatin	Phase II	2001
lung cancer	Drug: Docetaxel|Drug: Irinotecan	Phase II	2000
lung cancer	Drug: Bay 59-8862	Phase II	2001
lung cancer	Drug: ALIMTA|Drug: Carboplatin	Phase II	2002
lung cancer	Drug: Pemetrexed|Drug: Gemcitabine	Phase II	2002
lung cancer	Drug: Pivanex|Drug: Docetaxel	Phase II	2003
lung cancer	Drug: Gemcitabine|Drug: LY293111|Drug: cisplatin	Phase II	2003
lung cancer	Drug: pemetrexed|Drug: gemcitabine	Phase II	2003
lung cancer	Drug: ZD6474|Drug: Paclitaxel|Drug: Carboplatin	Phase II	2004
lung cancer	Drug: Cetuximab	Phase II	2004
lung cancer	Drug: Sunitinib	Phase II	2005
lung cancer	Drug: SNS-595 Injection	Phase II	2005
lung cancer	Drug: ZD6474|Drug: Placebo|Drug: ZD1839	Phase II	2005
lung cancer|Lung Neoplasms	Drug: paclitaxel|Drug: cisplatin	Phase II	1995
lung cancer|Lung Neoplasms	Drug: paclitaxel|Drug: cisplatin|Procedure: chest radiotherapy	Phase II	1996
lung cancer|Pulmonary Neoplasms|Neoplasms, Lung	Drug: Gemcitabine|Drug: Carboplatin|Drug: LY900003	Phase II	2002
kidney cancer	Drug: Bay 59-8862	Phase II	2001
kidney cancer	Drug: ABT-510/Thrombospondin-1 mimetic	Phase II	2003
kidney cancer	Drug: Recombinant Human Lactoferrin	Phase II	2004
kidney cancer	Drug: SU011248	Phase II	2005
Cancer, Smleukemia Cell	Drug: Pemetrexed	Phase II	2004
Cancer, Smleukemia Cell	Drug: BI 2536	Phase II	2007
Cervical Cancer	Drug: recombinant interleukin-12	Phase II	1997
Cervical Cancer	Drug: cisplatin|Drug: vinorelbine ditartrate	Phase II	1997
Cervical Cancer	Drug: exatecan mesylate	Phase II	2000
Cervical Cancer	Drug: oxaliplatin	Phase II	2000
Cervical Cancer	Drug: arsenic trioxide	Phase II	2000
Cervical Cancer	Drug: gemcitabine hydrochloride	Phase II	2000
Cervical Cancer	Drug: cisplatin|Drug: gemcitabine hydrochloride	Phase II	2000
Cervical Cancer	Drug: capecitabine	Phase II	2001
Cervical Cancer	Drug: pegylated liposomal doxorubicin hydrochloride	Phase II	2001
Cervical Cancer	Drug: erlotinib hydrochloride	Phase II	2002
Cervical Cancer	Drug: docetaxel	Phase II	2002
Cervical Cancer	Drug: Capecitabine|Drug: Docetaxel	Phase II	2004
Cervical Cancer|Endometrial Cancer|Ovarian Cancer|Peritoneal Cavity Cancer	Drug: EF5|Procedure: biopsy|Procedure: conventional surgery|Procedure: flow cytometry|Procedure: immunohistochemistry staining method	Phase II	2005
Cervical Cancer|Fleukemiaopian Tube Cancer|Ovarian Cancer|Peritoneal Cavity Cancer	Drug: gefitinib|Procedure: biopsy|Procedure: immunohistochemistry staining method|Procedure: sentinel lymph node biopsy|Procedure: surface-enhanced laser desorption/ionization-time of flight mass spectrometry	Phase II	2002
Cervical Cancer|Precancerous/NonCondition	Drug: HspE7	Phase II	2004
Cervical Cancer|Precancerous/NonCondition	Drug: HspE7	Phase II	2004
Cervical Cancer|Vaginal Cancer	Drug: paclitaxel	Phase II	1994
Cervical Intraepithelial Neoplasia|Uterine Cervical Dysplasia	Drug: A-007	Phase II	2006
Cervical Intraepithelial Neoplasia|Uterine Neoplasms|Genital Neoplasms, Female	Drug: Pemetrexed	Phase II	2005
Chemotherapy-Induced Nausea and Vomiting	Drug: GW679769|Drug: Dexamethasone|Drug: Ondansetron Hydrochloride	Phase II	2004
Childhood Fibrous Histiocytoma of Bone|Sarcoma	Drug: imatinib mesylate	Phase II	2002
CholangioCancer|Gleukemiabladder Cancer	Drug: Gemcitabine + Carboplatin	Phase II	2002
Chronic Hepatitis B|Chronic Hepatitis D|Glomerulonephritis|Polyarteritis Nodosa	Drug: Lamivudine	Phase II	1995
Chronic Hepatitis C	Drug: Gamma Interferon 1b	Phase II	2001
leukemia	Drug: OSI-461	Phase II	2001
leukemia	Drug: AT-101	Phase II	2006
leukemia|Leukemia	Drug: Valganciclovir|Drug: Valacyclovir	Phase II	2003
leukemia	Drug: decitabine (5-aza-2'deoxycytidine)	Phase II	2002
leukemia	Drug: decitabine (5-aza-2'deoxycytidine)	Phase II	2002
leukemia	Drug: decitabine (5-aza-2'deoxycytidine)	Phase II	2002
leukemia	Drug: Nexavar (Sorafenib, BAY43-9006)	Phase II	2004
leukemia	Drug: Dasatinib	Phase II	2004
leukemia|leukemia|Myelodysplasia|leukemia|Severe Aplastic Anemia|lymphoma|Lymphoproliferative Disease|myeloma|Myeloproliferative Disease	Drug: Busulfan/Fludarabine phosphate/Tacrolimus/Methotrexate/G-CSF	Phase II	2002
leukemia|Blast Crisis	Drug: Dasatinib	Phase II	2004
leukemia|Graft vs Host Disease	Drug: Modified bone marrow stem cell transplantation	Phase II	1999
leukemia|Leukemia, Lymphoblastic, Acute, Philadelphia-Positive	Drug: Dasatinib	Phase II	2005
leukemia|Philadelphia-Positive Myeloid Leukemia	Drug: Dasatinib|Drug: Imatinib	Phase II	2005
leukemia|Philadelphia-Positive Myeloid Leukemia	Drug: dasatinib	Phase II	2005
Chronic Myeloproliferative Disorders	Drug: thalidomide	Phase II	2001
Chronic Myeloproliferative Disorders|Leukemia|Lymphoma|Multicentric Castleman Disease|Precancerous/NonCondition	Drug: tanespimycin	Phase II	2006
Chronic Myeloproliferative Disorders|Leukemia|myeloma and Plasma Cell Neoplasm	Drug: busulfan|Drug: cyclophosphamide|Procedure: leukemiaogeneic bone marrow transplantation|Procedure: radiation therapy	Phase II	1999
Chronic Myeloproliferative Disorders|Leukemia|Myelodysplastic Syndromes|Myelodysplastic/Myeloproliferative Diseases	Drug: arsenic trioxide|Drug: ascorbic acid|Drug: dexamethasone|Drug: thalidomide	Phase II	2005
Colorectal cancer|Adenoma|Colonic Polyps	Drug: Folic Acid	Phase II	1998
Colorectal cancer|Colorectal cancer	Drug: CoFactand 5FU	Phase II	2004
Colorectal AdenoCancer	Drug: Capecitabine|Drug: Thalidomide	Phase II	2001
Colorectal Adenoma|Colorectal cancer	Drug: Celecoxib|Drug: Placebo	Phase II	2001
Colorectal cancer	Drug: edrecolomab|Drug: sargramostim	Phase II	1995
Colorectal cancer	Drug: irinotecan hydrochloride	Phase II	1997
Colorectal cancer	Drug: bryostatin 1	Phase II	1998
Colorectal cancer	Drug: irinotecan hydrochloride|Procedure: surgical procedure	Phase II	1998
Colorectal cancer	Drug: irinotecan hydrochloride|Drug: trastuzumab	Phase II	1999
Colorectal cancer	Drug: becatecarin	Phase II	2000
Colorectal cancer	Drug: ISIS 2503	Phase II	2000
Colorectal cancer	Drug: chloroquinoxaline sulfonamide	Phase II	2000
Colorectal cancer	Drug: fluorouracil|Drug: leucovorin calcium|Drug: oxaliplatin|Drug: trastuzumab	Phase II	2000
Colorectal cancer	Drug: fluorouracil|Drug: oxaliplatin|Procedure: conventional surgery|Procedure: neoadjuvant therapy|Procedure: radiation therapy	Phase II	2000
Colorectal cancer	Drug: leucovorin calcium|Drug: tegafur-uracil	Phase II	2000
Colorectal cancer	Drug: O6-benzylguanine|Drug: carmustine	Phase II	2000
Colorectal cancer	Drug: gemcitabine hydrochloride	Phase II	2000
Colorectal cancer	Drug: bevacizumab|Drug: fluorouracil|Drug: irinotecan hydrochloride|Drug: leucovorin calcium	Phase II	2000
Colorectal cancer	Drug: MKC-1	Phase II	2000
Colorectal cancer	Drug: fluorouracil|Drug: irinotecan hydrochloride|Procedure: conventional surgery|Procedure: radiation therapy	Phase II	2001
Colorectal cancer	Drug: capecitabine|Drug: irinotecan hydrochloride	Phase II	2001
Colorectal cancer	Drug: FOLFOX regimen|Drug: fluorouracil|Drug: leucovorin calcium|Drug: oxaliplatin	Phase II	2001
Colorectal cancer	Drug: fluorouracil|Drug: leucovorin calcium|Procedure: adjuvant therapy|Procedure: conventional surgery|Procedure: radiation therapy	Phase II	2001
Colorectal cancer	Drug: ixabepilone	Phase II	2001
Colorectal cancer	Drug: gefitinib	Phase II	2001
Colorectal cancer	Drug: oxaliplatin|Drug: fluoropyrimidine|Drug: bevacizumab	Phase II	2002
Colorectal cancer	Drug: gefitinib	Phase II	2002
Colorectal cancer	Drug: imatinib mesylate	Phase II	2002
Colorectal cancer	Drug: fluorouracil|Drug: gefitinib|Drug: irinotecan hydrochloride|Drug: leucovorin calcium	Phase II	2002
Colorectal cancer	Drug: ABT-751	Phase II	2003
Colorectal cancer	Drug: Gemcitabine|Drug: avastin|Drug: 5FU/folinic acid|Drug: oxaliplatin	Phase II	2003
Colorectal cancer	Drug: Celecoxib|Drug: Capecitabine|Drug: Irinotecan	Phase II	2003
Colorectal cancer	Drug: capecitabine	Phase II	2003
Colorectal cancer	Drug: celecoxib	Phase II	2003
Colorectal cancer	Drug: bevacizumab|Drug: fluorouracil|Drug: leucovorin calcium	Phase II	2003
Colorectal cancer	Drug: epothilone D	Phase II	2003
Colorectal cancer	Drug: bevacizumab|Drug: cetuximab|Drug: irinotecan hydrochloride	Phase II	2003
Colorectal cancer	Drug: Cetuximab	Phase II	2004
Colorectal cancer	Drug: fluorouracil|Drug: leucovorin calcium|Drug: oxaliplatin|Drug: sargramostim|Procedure: adjuvant therapy|Procedure: conventional surgery|Procedure: neoadjuvant therapy	Phase II	2004
Colorectal cancer	Drug: pelitrexol	Phase II	2004
Colorectal cancer	Drug: romidepsin	Phase II	2004
Colorectal cancer	Drug: XL999	Phase II	2005
Colorectal cancer	Drug: RAD001	Phase II	2006
Colorectal cancer	Drug: Vandetanib|Drug: FOLFIRI	Phase II	2007
Colorectal cancer|Colorectal cancer	Drug: gemcitabine, capecitabine	Phase II	2004
Colorectal cancer|Endometrial Cancer|Head and Neck Cancer|Liver Cancer|Lung Cancer|skin cancer (Skin)|Pancreatic Cancer|Testicular cancer|Unspecified Adult Solid Tumor, Protocol Specific	Drug: DetoxPC|Drug: aldesleukin|Drug: ras peptide cancer vaccine|Drug: sargramostim	Phase II	1997
Colorectal cancer|esophagus cancer|Extrahepatic Bile Duct Cancer|Gleukemiabladder Cancer|stomach cancer|Pancreatic Cancer|Smleukemia Intestine Cancer	Drug: carcinoembryonic antigen peptide 1-6D|Drug: incomplete Freund's adjuvant|Drug: sargramostim	Phase II	2002
Colorectal cancer|Cancer	Drug: dexamethasone|Drug: floxuridine|Drug: irinotecan hydrochloride|Procedure: adjuvant therapy|Procedure: conventional surgery	Phase II	1998
Colorectal cancer|Cancer	Drug: FOLFOX regimen|Drug: fluorouracil|Drug: leucovorin calcium|Drug: oxaliplatin	Phase II	1999
Colorectal cancer|Cancer	Drug: floxuridine|Drug: irinotecan hydrochloride|Procedure: adjuvant therapy	Phase II	2003
Colorectal cancer|Cancer	Drug: melphalan|Procedure: conventional surgery|Procedure: isolated perfusion	Phase II	2004
Colorectal cancer|Cancer	Drug: FOLFOX regimen|Drug: fluorouracil|Drug: leucovorin calcium|Drug: melphalan|Drug: oxaliplatin|Procedure: isolated perfusion	Phase II	2004
Colorectal cancer|Cancer	Drug: bevacizumab|Drug: capecitabine|Drug: oxaliplatin|Procedure: adjuvant therapy|Procedure: conventional surgery|Procedure: neoadjuvant therapy	Phase II	2006
Colorectal cancer|Neoplasm Metastasis	Drug: Tarceva (OSI-774)|Drug: Capecitabine|Drug: Oxaliplatin	Phase II	2003
Colorectal cancer|Neoplasm Metastasis	Drug: Bevacizumab	Phase II	2005
Colorectal cancer|Neoplasm Metastasis	Drug: erlotinib|Drug: FOLFOX|Drug: bevacizumab	Phase II	2005
Colorectal cancer	Drug: VELCADE TM (bortezomib) fInjection, PS-341	Phase II	2002
Colorectal Neoplasm	Drug: 2-Fluoro-2-deoxyglucose	Phase II	1997
Colorectal Neoplasms	Drug: 5-fluorouracil	Phase II	1995
Colorectal Neoplasms	Drug: PELITREXOL/AG-2037	Phase II	2003
Colorectal Neoplasms	Drug: CP-675,206	Phase II	2006
Colorectal Neoplasms|Breast Neoplasms|lung cancer|Pancreatic Neoplasms	Drug: CI-1040	Phase II	2002
Colorectal Neoplasms|Colonic Neoplasms	Drug: epothilone b	Phase II	2002
Constipation	Drug: N-methylnaltrexone bromide (MOA-728)|Other: placebo	Phase II	2007
Constipation|Bowel Dysfunction	Drug: alvimopan	Phase II	2003
Contraception|Hypogonadism	Drug: Oral Testosterone|Drug: Leuprolide (Lupron)|Drug: Dutasteride	Phase II	2005
Corpus Uteri|Endometrial Cancer	Drug: 9-NC in aerosol reservoir	Phase II	2003
Crohn Disease|Crohns Disease	Drug: Uvadex	Phase II	2005
Cutaneous T-Cell Lymphoma|Mycosis Fungoides|Sezary Syndrome	Drug: Rosiglitazone	Phase II	2005
Dermatomyositis|Polymyositis	Drug: methimazole	Phase II	1995
Desmoid Tumor	Drug: methotrexate|Drug: vinblastine	Phase II	1997
Discoid Lupus Erythematosus	Drug: Thalidomide	Phase II	1997
Dyspepsia	Drug: dexloxiglumide|Drug: Nexium (esomeprazole)	Phase II	2006
Endometrial Cancer	Drug: danazol	Phase II	1999
Endometrial Cancer	Drug: oxaliplatin	Phase II	1999
Endometrial Cancer	Drug: raloxifene	Phase II	2000
Endometrial Cancer	Drug: pegylated liposomal doxorubicin hydrochloride	Phase II	2000
Endometrial Cancer	Drug: irofulven	Phase II	2000
Endometrial Cancer	Drug: alvocidib	Phase II	2001
Endometrial Cancer	Drug: thalidomide	Phase II	2001
Endometrial Cancer	Drug: topotecan	Phase II	2005
Endometrial Cancer	Drug: AP23573	Phase II	2005
Endometrial Cancer|Fleukemiaopian Tube Cancer|Ovarian Cancer|Sarcoma	Drug: paclitaxel|Drug: pegylated liposomal doxorubicin hydrochloride	Phase II	1997
Endometrial Cancer|Sarcoma	Drug: pegylated liposomal doxorubicin hydrochloride	Phase II	2000
Endometrial Cancer|Sarcoma	Drug: thalidomide	Phase II	2000
Epithelial Ovarian Cancer|Primary Peritoneal Cancer	Drug: Topotecan|Drug: Cisplatin|Drug: Paclitaxel	Phase II	2005
esophagus cancer	Drug: eflornithine	Phase II	1995
esophagus cancer	Drug: carboplatin|Drug: docetaxel	Phase II	1999
esophagus cancer	Drug: alvocidib|Drug: paclitaxel	Phase II	2000
esophagus cancer	Drug: celecoxib	Phase II	2000
esophagus cancer	Drug: erlotinib hydrochloride	Phase II	2002
esophagus cancer	Drug: arsenic trioxide	Phase II	2003
esophagus cancer|Cancer of the Esophagus|Esophagus Cancer|Esophageal Neoplasm|Cancer of Esophagus	Drug: Irinotecan (drug)|Drug: Taxotere (drug)|Procedure: Radiotherapy (procedure)|Procedure: Esophagectomy (procedure)	Phase II	2002
esophagus cancer|stomach cancer	Drug: cisplatin|Drug: irinotecan hydrochloride	Phase II	1997
esophagus cancer|stomach cancer	Drug: irinotecan hydrochloride	Phase II	1997
esophagus cancer|stomach cancer	Drug: aminocamptothecin	Phase II	1998
esophagus cancer|stomach cancer	Drug: docetaxel|Drug: irinotecan hydrochloride	Phase II	2000
esophagus cancer|stomach cancer	Drug: bryostatin 1|Drug: paclitaxel	Phase II	2000
esophagus cancer|stomach cancer	Drug: FOLFOX regimen|Drug: fluorouracil|Drug: leucovorin calcium|Drug: oxaliplatin	Phase II	2000
esophagus cancer|stomach cancer	Drug: ixabepilone	Phase II	2001
esophagus cancer|stomach cancer	Drug: cisplatin|Drug: filgrastim|Drug: fluorouracil|Drug: paclitaxel|Procedure: radiation therapy	Phase II	2001
esophagus cancer|stomach cancer	Drug: exatecan mesylate	Phase II	2001
esophagus cancer|stomach cancer	Drug: cisplatin|Drug: paclitaxel|Procedure: adjuvant therapy|Procedure: radiation therapy	Phase II	2001
esophagus cancer|stomach cancer	Drug: erlotinib hydrochloride	Phase II	2002
esophagus cancer|stomach cancer	Drug: capecitabine|Drug: oxaliplatin	Phase II	2002
esophagus cancer|stomach cancer	Drug: capecitabine|Drug: docetaxel	Phase II	2003
esophagus cancer|stomach cancer|Stomach Cancer	Drug: Vinorelbine	Phase II	2000
Esophageal Neoplasms|Stomach Neoplasms|AdenoCancer	Drug: tezacitabine|Drug: 5-fluorouracil	Phase II	2003
Esophagitis|Pneumonitis|lung cancer	Drug: Amifostine	Phase II	2003
Ewing's Sarcoma|Neuroblastoma|Rhabdomyosarcoma	Drug: ADR-529|Drug: Topotecan|Drug: G-CSF	Phase II	1993
Extensive Stage lung cancer|Stage IIIA lung cancer|Stage IV lung cancer|lung cancer|Stage IIIB lung cancer|lung cancer	Drug: FR901228	Phase II	2000
Extragonadal Germ Cell Tumor|Ovarian Cancer	Drug: carboplatin|Drug: cyclophosphamide|Drug: dactinomycin|Drug: doxorubicin hydrochloride|Drug: etoposide|Drug: filgrastim|Drug: leucovorin calcium|Drug: methotrexate|Drug: vincristine sulfate|Procedure: conventional surgery	Phase II	1991
Extragonadal Germ Cell Tumor|Ovarian Cancer|Testicular cancer|Unspecified Adult Solid Tumor, Protocol Specific	Drug: carboplatin|Drug: cyclophosphamide|Drug: etoposide|Procedure: autologous bone marrow transplantation	Phase II	1993
Extragonadal Germ Cell Tumor|Testicular cancer	Drug: arsenic trioxide	Phase II	2002
Extrahepatic Bile Duct Cancer|Gleukemiabladder Cancer|Liver Cancer	Drug: becatecarin	Phase II	1999
Extraocular Extension skin cancer|skin cancer	Drug: gp100 antigen|Drug: interleukin-2|Drug: MART-1 antigen|Drug: Montanide ISA-51	Phase II	2001
Fleukemiaopian Tube Cancer|Ovarian Cancer|Peritoneal Cavity Cancer	Drug: carboxyamidotriazole|Procedure: chemotherapy	Phase II	1998
Fleukemiaopian Tube Cancer|Ovarian Cancer|Peritoneal Cavity Cancer	Drug: irofulven	Phase II	1998
Fleukemiaopian Tube Cancer|Ovarian Cancer|Peritoneal Cavity Cancer	Drug: capecitabine	Phase II	1998
Fleukemiaopian Tube Cancer|Ovarian Cancer|Peritoneal Cavity Cancer	Drug: exatecan mesylate	Phase II	1999
Fleukemiaopian Tube Cancer|Ovarian Cancer|Peritoneal Cavity Cancer	Drug: plevitrexed|Drug: topotecan hydrochloride	Phase II	2001
Fleukemiaopian Tube Cancer|Ovarian Cancer|Peritoneal Cavity Cancer	Drug: imatinib mesylate	Phase II	2002
Fleukemiaopian Tube Cancer|Ovarian Cancer|Peritoneal Cavity Cancer	Drug: irinotecan hydrochloride	Phase II	2003
Fleukemiaopian Tube Cancer|Ovarian Cancer|Peritoneal Cavity Cancer	Drug: carboplatin|Drug: docetaxel|Procedure: adjuvant therapy	Phase II	2004
Fleukemiaopian Tube Cancer|Ovarian Cancer|Peritoneal Cavity Cancer	Drug: CP-547,632	Phase II	2004
Fleukemiaopian Tube Cancer|Ovarian Cancer|Peritoneal Cavity Cancer	Drug: sorafenib tosylate|Procedure: immunoenzyme technique|Procedure: immunohistochemistry staining method|Procedure: laboratory biomarker analysis|Procedure: pharmacological study	Phase II	2007
Fatigue|Neoplasms	Drug: dexmethylphenidate(d-mph)	Phase II	2002
Fatigue|Prostate Cancer	Drug: Ritalin	Phase II	2002
Fibrosis|Radiation Injuries	Drug: pentoxifylline	Phase II	1995
Lymphoma	Drug: AT-101|Drug: Rituximab	Phase II	2006
Lymphoma|Diffuse Large Cell Lymphoma|Mantle Cell Lymphoma|Smleukemia Lymphocytic Lymphoma|leukemia	Drug: AT-101	Phase II	2005
Gleukemiabladder Cancer|Biliary Tract Cancer	Drug: Gemcitabine|Drug: Cisplatin	Phase II	2002
Gastric AdenoCancer|stomach cancer	Drug: floxuridine, 5-Fluorouracil, leucovorin|Procedure: External Beam Radiotherapy|Procedure: Surgery	Phase II	2003
stomach cancer	Drug: docetaxel|Drug: doxorubicin hydrochloride|Drug: filgrastim|Drug: fluorouracil|Drug: hydroxyurea|Drug: recombinant interferon alfa	Phase II	1997
stomach cancer	Drug: cisplatin|Drug: fluorouracil|Drug: leucovorin calcium|Drug: paclitaxel|Procedure: conventional surgery|Procedure: neoadjuvant therapy|Procedure: radiation therapy	Phase II	1999
Gastric Cancer|Gastroesophageal Junction Cancer	Drug: Oxaliplatin|Drug: Capecitabine|Drug: Celecoxib	Phase II	2004
Gastrinoma|Zollinger Ellison Syndrome	Drug: Pantoprazole|Drug: Omeprazole	Phase II	1983
Gastroesophageal AdenoCancer|Gastric AdenoCancer	Drug: OSI-7904L	Phase II	2003
Gastrointestinal Cancer	Drug: Oxaliplatin	Phase II	2004
Gastrointestinal Carcinoid Tumor	Drug: PEG-interferon alfa-2b|Drug: bevacizumab	Phase II	2003
Gastrointestinal Carcinoid Tumor|Islet Cell Tumor	Drug: bortezomib	Phase II	2001
Gastrointestinal Carcinoid Tumor|Lung Cancer	Drug: fluorouracil|Drug: recombinant interferon alfa	Phase II	1990
Gastrointestinal Stromal Tumor	Drug: temozolomide	Phase II	2000
Gastrointestinal Stromal Tumor|Sarcoma	Drug: semaxanib	Phase II	2000
Gastrointestinal Stromal Tumor|Sarcoma|Smleukemia Intestine Cancer	Drug: rubitecan	Phase II	1999
Gastrointestinal Stromal Tumors	Drug: SU011248	Phase II	2005
Gestational Trophoblastic Tumor	Drug: dactinomycin	Phase II	1999
Gestational Trophoblastic Tumor	Drug: pemetrexed disodium	Phase II	2005
brain cancer Multiforme	Drug: TP-38	Phase II	2004
Graft Versus Host Disease|Hematologic Malignancies	Drug: Sirolimus|Drug: Tacrolimus|Drug: Methotrexate|Procedure: Stem Cell Transplantation	Phase II	2002
Graft Vs Host Disease	Drug: Prochymal	Phase II	2005
Hairy Cell Leukemia	Drug: Roferon-A	Phase II	1997
Head and Neck Cancer	Drug: porfimer sodium|Procedure: fluorophotometry	Phase II	1995
Head and Neck Cancer	Drug: paclitaxel	Phase II	1995
Head and Neck Cancer	Drug: cisplatin|Drug: fluorouracil|Drug: tirapazamine|Procedure: chemosensitization/potentiation therapy|Procedure: chemotherapy|Procedure: low-LET photon therapy|Procedure: radioisotope therapy	Phase II	1996
Head and Neck Cancer	Drug: paclitaxel	Phase II	1997
Head and Neck Cancer	Drug: carboplatin|Drug: paclitaxel	Phase II	1998
Head and Neck Cancer	Drug: bryostatin 1	Phase II	1998
Head and Neck Cancer	Drug: thalidomide	Phase II	1999
Head and Neck Cancer	Drug: filgrastim|Drug: fluorouracil|Drug: hydroxyurea|Drug: paclitaxel|Procedure: conventional surgery|Procedure: radiation therapy	Phase II	1999
Head and Neck Cancer	Drug: carboplatin|Drug: docetaxel	Phase II	1999
Head and Neck Cancer	Drug: oxaliplatin	Phase II	1999
Head and Neck Cancer	Drug: cisplatin|Drug: filgrastim|Drug: paclitaxel|Procedure: conventional surgery|Procedure: radiation therapy	Phase II	2000
Head and Neck Cancer	Drug: cisplatin|Procedure: radiation therapy	Phase II	2000
Head and Neck Cancer	Drug: interleukin-2 gene|Drug: methotrexate|Procedure: gene therapy	Phase II	2000
Head and Neck Cancer	Drug: cisplatin|Drug: fluorouracil|Drug: paclitaxel	Phase II	2000
Head and Neck Cancer	Drug: gefitinib	Phase II	2001
Head and Neck Cancer	Drug: gefitinib	Phase II	2001
Head and Neck Cancer	Drug: EF5|Procedure: bioluminescence|Procedure: biopsy|Procedure: flow cytometry|Procedure: immunohistochemistry staining method	Phase II	2002
Head and Neck Cancer	Drug: ixabepilone	Phase II	2002
Head and Neck Cancer	Drug: combretastatin A4 phosphate	Phase II	2003
Head and Neck Cancer	Drug: PEG-interferon alfa-2b|Procedure: conventional surgery|Procedure: neoadjuvant therapy	Phase II	2004
Head and Neck Cancer	Drug: bortezomib|Drug: doxorubicin hydrochloride	Phase II	2004
Head and Neck Cancer	Drug: sorafenib tosylate	Phase II	2004
Head and Neck Cancer	Drug: erlotinib hydrochloride	Phase II	2005
Head and Neck Cancer	Drug: bortezomib|Drug: gemcitabine hydrochloride	Phase II	2006
Head and Neck Cancer.	Drug: Amifostine|Drug: Carboplatin|Drug: Taxol|Device: Radiotherapy	Phase II	2002
Head and Neck Cancer|Precancerous/NonCondition	Drug: celecoxib	Phase II	2004
Head and Neck Cancer|Precancerous/NonCondition	Drug: rosiglitazone maleate|Procedure: DNA ploidy analysis|Procedure: biopsy|Procedure: evaluation of cancer risk factors|Procedure: immunohistochemistry staining method|Procedure: laboratory biomarker analysis|Procedure: reverse transcriptase-polymerase chain reaction	Phase II	2006
Head and Neck Neoplasms|skin cancer	Drug: ARQ 501	Phase II	2006
Healthy	Drug: Ginseng|Drug: Ginkgo	Phase II	2002
Hematologic Diseases|Myelodysplastic Syndromes	Drug: Antithymocyte globulin|Drug: Cyclosporine	Phase II	1998
Hematologic Malignancies|Leukemia|Myelodysplastic Syndromes|Myeloid Metaplasia|Lymphoma	Drug: AP23573	Phase II	2004
Hematologic Malignancies|Myelogenous Leukemia|leukemia|Myelodysplastic Syndrome|lymphoma|Hodgkin's Disease	Drug: Sirolimus|Drug: Tacrolimus	Phase II	2002
Hepatitis B|HIV Infection	Drug: Adefovir	Phase II	2001
Hepatitis C	Drug: Herbal remedies	Phase II	1998
liver cancer	Drug: patupilone	Phase II	2006
liver cancer	Drug: Darinaparsin	Phase II	2007
HIV Infection	Drug: Ritonavir|Drug: Nevirapine|Drug: Stavudine	Phase II	1998
HIV Infections	Drug: Tipranavir	Phase II	2002
HIV Infections|Immunologic Deficiency Syndromes|Lymphoproliferative Disorders	Drug: leukemia-trans-retinoic acid with IFN-alpha2a	Phase II	1995
Hodgkin's Disease	Drug: Alemtuzumab (Campath-1H) Monoclonal Antibody	Phase II	2005
Hodgkin's Disease	Drug: AMD3100	Phase II	2005
Hot Flashes	Drug: Flaxseed	Phase II	2005
Immunoproliferative Disorder	Drug: Bacteriophage|Drug: rhuCD40L|Drug: KLH	Phase II	1999
Impotence|Prostate Cancer	Drug: GPI 1485	Phase II	2003
Inflammation|Vasculitis|Wegener's Granulomatosis	Drug: prednisone and methotrexate	Phase II	1990
skin cancer|skin cancer (Skin)	Drug: pyrazoloacridine	Phase II	1999
skin cancer|skin cancer (Skin)	Drug: gp100 antigen|Drug: incomplete Freund's adjuvant|Drug: ipilimumab	Phase II	2002
skin cancer|skin cancer (Skin)	Drug: MART-1 antigen|Drug: alum adjuvant|Drug: gp100 antigen|Drug: incomplete Freund's adjuvant|Drug: recombinant interleukin-12|Drug: sargramostim|Drug: tyrosinase peptide|Procedure: adjuvant therapy	Phase II	2002
skin cancer|skin cancer (Skin)	Drug: recombinant interferon beta	Phase II	2004
skin cancer|skin cancer (Skin)	Drug: agatolimod sodium|Drug: gp100 antigen|Drug: incomplete Freund's adjuvant|Drug: recombinant MAGE-3.1 antigen|Drug: tyrosinase peptide|Procedure: adjuvant therapy	Phase II	2004
skin cancer|Cancer	Drug: melphalan|Drug: temozolomide|Procedure: adjuvant therapy|Procedure: isolated perfusion	Phase II	2003
Irritable Bowel Syndrome	Drug: crofelemer	Phase II	2006
Islet Cell Adenoma|Neoplasm Metastasis|Zollinger Ellison Syndrome	Drug: combined chemotherapy with streptozotocin, 5-fluorouracil, and doxorubicin	Phase II	1978
Islet Cell Adenoma|Zollinger Ellison Syndrome	Drug: Interferon	Phase II	1988
Juvenile Rheumatoid Arthritis|Uveitis	Drug: Enbrel	Phase II	1999
Kidney Cancer	Drug: irofulven	Phase II	1998
Kidney Cancer	Drug: aminocamptothecin colloidal dispersion	Phase II	1998
Kidney Cancer	Drug: bryostatin 1	Phase II	1999
Kidney Cancer	Drug: carboxyamidotriazole	Phase II	2000
Kidney Cancer	Drug: arsenic trioxide	Phase II	2000
Kidney Cancer	Drug: becatecarin	Phase II	2000
Kidney Cancer	Drug: carboxyamidotriazole	Phase II	2000
Kidney Cancer	Drug: recombinant interferon alfa|Drug: semaxanib	Phase II	2000
Kidney Cancer	Drug: semaxanib	Phase II	2000
Kidney Cancer	Drug: fenretinide	Phase II	2000
Kidney Cancer	Drug: gefitinib	Phase II	2001
Kidney Cancer	Drug: alvocidib	Phase II	2001
Kidney Cancer	Drug: anti-thymocyte globulin|Drug: cyclophosphamide|Drug: fludarabine phosphate|Drug: mycophenolate mofetil|Drug: tacrolimus|Drug: therapeutic leukemiaogeneic lymphocytes|Procedure: leukemiaogeneic bone marrow transplantation|Procedure: graft-versus-tuminduction therapy|Procedure: peripheral blood stem cell transplantation	Phase II	2001
Kidney Cancer	Drug: anti-FLT-1 ribozyme	Phase II	2001
Kidney Cancer	Drug: cyclophosphamide|Drug: filgrastim|Drug: fludarabine phosphate|Drug: methotrexate|Drug: tacrolimus|Drug: therapeutic leukemiaogeneic lymphocytes|Procedure: peripheral blood stem cell transplantation	Phase II	2001
Kidney Cancer	Drug: aldesleukin|Drug: bryostatin 1	Phase II	2002
Kidney Cancer	Drug: epothilone B	Phase II	2002
Kidney Cancer	Drug: erlotinib hydrochloride	Phase II	2002
Kidney Cancer	Drug: capecitabine|Drug: gemcitabine hydrochloride	Phase II	2002
Kidney Cancer	Drug: ipilimumab	Phase II	2003
Kidney Cancer	Drug: oblimersen|Drug: recombinant interferon alfa	Phase II	2003
Kidney Cancer	Drug: gemcitabine hydrochloride|Drug: irinotecan hydrochloride	Phase II	2004
Kidney Cancer	Drug: lenalidomide	Phase II	2004
Kidney Cancer	Drug: HLA-A2, A3-restricted FGF-5 peptides/Montanide ISA-51 vaccine|Drug: aldesleukin|Procedure: adjuvant therapy	Phase II	2004
Kidney Cancer	Drug: tanespimycin	Phase II	2004
Kidney Cancer	Drug: aldesleukin|Drug: cyclophosphamide|Drug: filgrastim|Drug: fludarabine phosphate|Drug: therapeutic autologous lymphocytes|Drug: therapeutic tuminfiltrating lymphocytes	Phase II	2004
Kidney Cancer	Drug: gemcitabine hydrochloride|Drug: imatinib mesylate|Procedure: gene expression analysis|Procedure: immunohistochemistry staining method|Procedure: laboratory biomarker analysis|Procedure: protein expression analysis	Phase II	2005
Kidney Cancer	Drug: therapeutic leukemiaogeneic lymphocytes|Procedure: immunoenzyme technique|Procedure: laboratory biomarker analysis	Phase II	2005
Kidney Cancer	Drug: tandutinib	Phase II	2006
Kidney Cancer|skin cancer (Skin)	Drug: denileukin diftitox	Phase II	2004
Kidney Cancer|skin cancer (Skin)	Drug: fludeoxyglucose F 18|Procedure: computed tomography|Procedure: positron emission tomography	Phase II	2006
Kidney Neoplasms	Drug: Thalidomide|Drug: Capecitabine	Phase II	2002
Kidney Neoplasms	Drug: SU-011,248	Phase II	2003
Kidney Neoplasms	Drug: VEGFR and PDGFR inhibitor	Phase II	2003
Kidney Neoplasms|kidney cancer|Adenokidney cancer	Drug: E7070	Phase II	2002
Kidney Transplantation	Drug: BG9588	Phase II	1999
Large Cell Lymphoma	Drug: SGN-30	Phase II	2004
Leiomyoma	Drug: CD2914	Phase II	2002
Leukemia	Drug: cyclophosphamide|Drug: cytarabine|Drug: etoposide|Drug: methotrexate|Drug: mitoxantrone hydrochloride|Drug: recombinant interferon alfa|Drug: sargramostim|Procedure: bone marrow ablation with stem cell support|Procedure: radiation therapy	Phase II	1994
Leukemia	Drug: omacetaxine mepesuccinate|Drug: recombinant interferon alfa	Phase II	1994
Leukemia	Drug: cyclophosphamide|Drug: cytarabine|Drug: dexamethasone|Drug: doxorubicin hydrochloride|Drug: etoposide|Drug: filgrastim|Drug: ifosfamide|Drug: leucovorin calcium|Drug: mesna|Drug: methotrexate|Drug: therapeutic hydrocortisone|Drug: vincristine sulfate|Procedure: low-LET cobalt-60 gamma ray therapy|Procedure: low-LET photon therapy	Phase II	1995
Leukemia	Drug: asparaginase|Drug: cyclophosphamide|Drug: cytarabine|Drug: daunorubicin hydrochloride|Drug: etoposide|Drug: filgrastim|Drug: leucovorin calcium|Drug: mercaptopurine|Drug: methotrexate|Drug: prednisone|Drug: therapeutic hydrocortisone|Drug: vincristine sulfate	Phase II	1996
Leukemia	Drug: asparaginase|Drug: cyclophosphamide|Drug: cyclosporine|Drug: cytarabine|Drug: daunorubicin hydrochloride|Drug: dexamethasone|Drug: etoposide|Drug: filgrastim|Drug: leucovorin calcium|Drug: mercaptopurine|Drug: mesna|Drug: methotrexate|Drug: methylprednisolone|Drug: pegaspargase|Drug: prednisone|Drug: therapeutic hydrocortisone|Drug: vincristine sulfate|Procedure: leukemiaogeneic bone marrow…	Phase II	1996
Leukemia	Drug: cladribine|Drug: cytarabine|Drug: etoposide|Drug: filgrastim|Drug: methotrexate|Drug: mitoxantrone hydrochloride|Drug: therapeutic hydrocortisone|Procedure: leukemiaogeneic bone marrow transplantation|Procedure: autologous bone marrow transplantation|Procedure: low-LET cobalt-60 gamma ray therapy|Procedure: low-LET electron therapy|Procedure: low-LET photon therapy|Procedure: peripheral blo…	Phase II	1997
Leukemia	Drug: cyclophosphamide|Drug: topotecan hydrochloride	Phase II	1997
Leukemia	Drug: Thalidomide	Phase II	1998
Leukemia	Drug: alvocidib	Phase II	1998
Leukemia	Drug: cytarabine|Drug: omacetaxine mepesuccinate	Phase II	1998
Leukemia	Drug: nelarabine	Phase II	1999
Leukemia	Drug: aldesleukin|Drug: busulfan|Drug: cyclophosphamide|Drug: etoposide|Drug: filgrastim|Drug: melphalan|Procedure: peripheral blood stem cell transplantation	Phase II	1999
Leukemia	Drug: theophylline	Phase II	1999
Leukemia	Drug: cyclophosphamide|Drug: fludarabine phosphate	Phase II	1999
Leukemia	Drug: cyclophosphamide|Drug: cytarabine|Drug: etoposide|Drug: filgrastim|Drug: idarubicin|Drug: recombinant interferon alfa|Procedure: peripheral blood stem cell transplantation|Procedure: radiation therapy	Phase II	1999
Leukemia	Drug: omacetaxine mepesuccinate	Phase II	1999
Leukemia	Drug: arsenic trioxide	Phase II	2000
Leukemia	Drug: arsenic trioxide	Phase II	2000
Leukemia	Drug: cladribine|Drug: filgrastim|Drug: idarubicin	Phase II	2000
Leukemia	Drug: arsenic trioxide	Phase II	2000
Leukemia	Drug: arsenic trioxide	Phase II	2000
Leukemia	Drug: arsenic trioxide	Phase II	2000
Leukemia	Drug: imatinib mesylate	Phase II	2000
Leukemia	Drug: cyclophosphamide|Drug: cytarabine|Drug: gemtuzumab ozogamicin|Drug: liposomal daunorubicin citrate|Drug: sargramostim|Drug: topotecan hydrochloride	Phase II	2000
Leukemia	Drug: thalidomide	Phase II	2000
Leukemia	Drug: arsenic trioxide	Phase II	2000
Leukemia	Drug: dexamethasone|Drug: oral sodium phenylbutyrate|Drug: sargramostim	Phase II	2000
Leukemia	Drug: alemtuzumab|Drug: cyclophosphamide|Drug: filgrastim|Procedure: peripheral blood stem cell transplantation|Procedure: radiation therapy	Phase II	2001
Leukemia	Drug: alvocidib|Drug: cytarabine|Drug: mitoxantrone hydrochloride	Phase II	2001
Leukemia	Drug: asparaginase|Drug: cyclophosphamide|Drug: cytarabine|Drug: daunorubicin hydrochloride|Drug: dexamethasone|Drug: doxorubicin hydrochloride|Drug: leucovorin calcium|Drug: mercaptopurine|Drug: methotrexate|Drug: nelarabine|Drug: pegaspargase|Drug: prednisone|Drug: thioguanine|Drug: vincristine sulfate|Procedure: radiation therapy	Phase II	2001
Leukemia	Drug: imatinib mesylate|Drug: recombinant interferon alfa	Phase II	2001
Leukemia	Drug: anti-thymocyte globulin|Drug: cyclophosphamide|Drug: cytarabine|Drug: fludarabine phosphate|Drug: isotretinoin|Drug: tipifarnib|Procedure: leukemiaogeneic bone marrow transplantation|Procedure: radiation therapy|Procedure: umbilical cord blood transplantation	Phase II	2001
Leukemia	Drug: cytarabine|Drug: imatinib mesylate	Phase II	2001
Leukemia	Drug: bevacizumab|Drug: cytarabine|Drug: idarubicin	Phase II	2001
Leukemia	Drug: bortezomib	Phase II	2001
Leukemia	Drug: denileukin diftitox	Phase II	2002
Leukemia	Drug: docetaxel	Phase II	2002
Leukemia	Drug: imatinib mesylate	Phase II	2002
Leukemia	Drug: imatinib mesylate|Drug: oblimersen	Phase II	2002
Leukemia	Drug: asparaginase|Drug: cyclophosphamide|Drug: cytarabine|Drug: doxorubicin hydrochloride|Drug: etoposide|Drug: filgrastim|Drug: imatinib mesylate|Drug: leucovorin calcium|Drug: methotrexate|Drug: pegaspargase|Drug: prednisone|Drug: therapeutic hydrocortisone|Drug: vincristine sulfate	Phase II	2003
Leukemia	Drug: decitabine|Drug: imatinib mesylate	Phase II	2003
Leukemia	Drug: cyclosporine|Drug: fludarabine phosphate|Drug: mycophenolate mofetil|Drug: therapeutic leukemiaogeneic lymphocytes|Procedure: peripheral blood stem cell transplantation|Procedure: radiation therapy	Phase II	2003
Leukemia	Drug: sargramostim	Phase II	2003
Leukemia	Drug: asparaginase|Drug: busulfan|Drug: cyclophosphamide|Drug: cyclosporine|Drug: cytarabine|Drug: daunorubicin hydrochloride|Drug: etoposide|Drug: gemtuzumab ozogamicin|Drug: methotrexate|Drug: mitoxantrone hydrochloride|Procedure: leukemiaogeneic bone marrow transplantation	Phase II	2003
Leukemia	Drug: cyclosporine|Drug: gemtuzumab ozogamicin	Phase II	2004
Leukemia	Drug: alemtuzumab|Drug: mercaptopurine|Drug: methotrexate	Phase II	2004
Leukemia	Drug: bevacizumab|Drug: cytarabine|Drug: idarubicin	Phase II	2004
Leukemia	Drug: cyclosporine|Drug: fludarabine phosphate|Drug: imatinib mesylate|Drug: mycophenolate mofetil|Drug: recombinant interferon alfa|Drug: therapeutic leukemiaogeneic lymphocytes|Procedure: peripheral blood stem cell transplantation|Procedure: radiation therapy	Phase II	2005
Leukemia	Drug: cilengitide	Phase II	2005
Leukemia, Lymphoblastic, Acute, Pediatric	Drug: clofarabine (IV formulation)	Phase II	2002
Leukemia, Myelocytic, Acute, Pediatric	Drug: clofarabine (IV formulation)	Phase II	2002
Leukemia, Myeloid	Drug: CEP-701 solution	Phase II	2002
Leukemia, Myeloid, Chronic|Leukemia, Lymphocytic, Acute, L2	Drug: Dasatinib	Phase II	2006
Leukemia, Myeloid|Myelodysplastic Syndromes	Drug: clofarabine|Drug: Ara-C	Phase II	2003
Leukemia, Myeloid|Myelodysplastic Syndromes	Drug: Gleevec|Drug: Ara-C	Phase II	2004
Leukemia, Other|Cancer	Drug: Gleevec and Arsenic Trioxide	Phase II	2004
Leukemia, T-Cell	Drug: forodesine hydrochloride (BCX-1777)	Phase II	2004
Leukemia|Lung Cancer|Lymphoma|myeloma and Plasma Cell Neoplasm|Myelodysplastic Syndromes|Prostate Cancer	Drug: azacitidine|Drug: sodium phenylbutyrate	Phase II	2000
Leukemia|Lymphoma	Drug: cyclophosphamide|Procedure: leukemiaogeneic bone marrow transplantation|Procedure: low-LET cobalt-60 gamma ray therapy	Phase II	1990
Leukemia|Lymphoma	Drug: bryostatin 1|Drug: vincristine sulfate	Phase II	1996
Leukemia|Lymphoma	Drug: dolastatin 10	Phase II	1998
Leukemia|Lymphoma	Drug: nelarabine	Phase II	1998
Leukemia|Lymphoma	Drug: aminolevulinic acid	Phase II	1999
Leukemia|Lymphoma	Drug: arsenic trioxide	Phase II	2000
Leukemia|Lymphoma	Drug: pentostatin|Drug: rituximab	Phase II	2000
Leukemia|Lymphoma	Drug: fludarabine phosphate|Drug: thalidomide	Phase II	2001
Leukemia|Lymphoma	Drug: cytarabine|Drug: mitoxantrone hydrochloride|Drug: sargramostim	Phase II	2001
Leukemia|Lymphoma	Drug: ixabepilone	Phase II	2002
Leukemia|Lymphoma	Drug: carboplatin|Drug: cytarabine|Drug: etoposide|Drug: filgrastim|Drug: ifosfamide|Drug: methotrexate|Drug: rituximab	Phase II	2003
Leukemia|Lymphoma	Drug: bryostatin 1|Drug: rituximab	Phase II	2004
Leukemia|Lymphoma	Drug: temsirolimus	Phase II	2004
Leukemia|Lymphoma	Drug: Forodesine Hydrochloride Sterile Solution, 5 mg/mL|Drug: Forodesine Hydrochloride Capsules (100 mg)	Phase II	2006
Leukemia|Lymphoma|myeloma and Plasma Cell Neoplasm	Drug: leukemiaogeneic Epstein-Barr virus-specific cytotoxic T lymphocytes|Drug: autologous Epstein-Barr virus-specific cytotoxic T lymphocytes	Phase II	2000
Leukemia|Lymphoma|myeloma and Plasma Cell Neoplasm|Myelodysplastic Syndromes	Drug: busulfan|Drug: cyclophosphamide|Drug: cytarabine|Procedure: leukemiaogeneic bone marrow transplantation	Phase II	1992
Leukemia|Lymphoma|myeloma and Plasma Cell Neoplasm|Myelodysplastic Syndromes	Drug: cyclophosphamide|Drug: cyclosporine|Drug: methotrexate|Procedure: leukemiaogeneic bone marrow transplantation|Procedure: in vitro-treated bone marrow transplantation|Procedure: radiation therapy	Phase II	1999
Leukemia|Lymphoma|Myelodysplastic Syndromes|Myelodysplastic/Myeloproliferative Diseases	Drug: anti-thymocyte globulin|Drug: cyclophosphamide|Drug: cytarabine|Drug: filgrastim|Drug: methylprednisolone|Drug: thiotepa|Procedure: in vitro-treated bone marrow transplantation|Procedure: in vitro-treated peripheral blood stem cell transplantation|Procedure: radiation therapy	Phase II	1995
Leukemia|Myelodysplastic Syndromes	Drug: bryostatin 1	Phase II	1998
Leukemia|Myelodysplastic Syndromes	Drug: topotecan hydrochloride	Phase II	1999
Leukemia|Myelodysplastic Syndromes	Drug: thalidomide	Phase II	2001
Leukemia|Myelodysplastic Syndromes	Drug: tipifarnib	Phase II	2002
Leukemia|Myelodysplastic Syndromes	Drug: temsirolimus	Phase II	2004
Leukemia|Myelodysplastic Syndromes|Myelodysplastic/Myeloproliferative Diseases	Drug: sargramostim	Phase II	1999
Leukemia|Myelodysplastic Syndromes|Myelodysplastic/Myeloproliferative Diseases	Drug: busulfan|Drug: cyclophosphamide|Procedure: leukemiaogeneic bone marrow transplantation|Procedure: bone marrow ablation with stem cell support|Procedure: radiation therapy	Phase II	1999
Leukemia|Myelodysplastic Syndromes|Myelodysplastic/Myeloproliferative Diseases	Drug: busulfan|Drug: etoposide|Drug: filgrastim|Procedure: autologous bone marrow transplantation	Phase II	1999
Leukemia|Myelodysplastic Syndromes|Myelodysplastic/Myeloproliferative Diseases	Drug: thalidomide	Phase II	2001
Leukemia|Myelodysplastic Syndromes|Myelodysplastic/Myeloproliferative Diseases	Drug: carboplatin|Drug: fludarabine phosphate|Drug: thalidomide|Drug: topotecan hydrochloride	Phase II	2002
Leukemia|Myelodysplastic Syndromes|Myelodysplastic/Myeloproliferative Diseases	Drug: cholecalciferol	Phase II	2003
Leukemia|Myelodysplastic Syndromes|Myelodysplastic/Myeloproliferative Diseases	Drug: hydroxyurea|Drug: laromustine	Phase II	2005
Leukemia|lymphoma	Drug: Topotecan|Drug: Mitozantrone|Drug: Etoposide	Phase II	1998
Leukemia|Systemic Mastocytosis	Drug: Ontak (Denileukin Diftitox)	Phase II	2004
Leukoplakia|Periodontal Disease	Drug: Ketorolac Rinse	Phase II	1998
Liver Cancer	Drug: recombinant interferon alfa|Drug: thalidomide	Phase II	2000
Liver Cancer	Drug: doxorubicin hydrochloride|Drug: thalidomide	Phase II	2000
Liver Cancer	Drug: docetaxel|Drug: gemcitabine hydrochloride	Phase II	2001
Liver Cancer	Drug: epirubicin hydrochloride|Drug: thalidomide	Phase II	2001
Liver Cancer	Drug: erlotinib hydrochloride	Phase II	2002
Liver Cancer	Drug: alvocidib|Drug: irinotecan hydrochloride	Phase II	2004
Liver Cancer	Drug: dexamethasone|Drug: floxuridine|Procedure: comparative genomic hybridization|Procedure: conventional surgery|Procedure: cytogenetic analysis	Phase II	2004
Liver Cancer	Drug: Pemetrexed	Phase II	2005
Liver Cancer	Drug: cediranib maleate	Phase II	2005
Liver Metastasis|Colorectal Neoplasms|Liver Neoplasms|Neoplasm Metastasis	Drug: Talaporfin sodium (LS11)|Device: LED-based light infusion device|Device: Light emitting diodes (LED)|Procedure: Photodynamic therapy|Procedure: Phototherapy|Procedure: Chemotherapy	Phase II	2003
Liver Metastasis|Colorectal Neoplasms|Liver Neoplasms|Neoplasm Metastasis	Drug: Talaporfin sodium (LS11)|Device: LED-based light infusion device|Device: Light emitting diodes (LED)|Procedure: Photodynamic therapy|Procedure: Phototherapy|Procedure: Chemotherapy	Phase II	2004
Liver|Cancer	Drug: Thalidomide, alpha interferon|Drug: Thalidomide, interferon, Octreotide	Phase II	2000
Localized Prostate Cancer	Drug: Silybin-Phytosome	Phase II	2006
Locleukemiay Adenoca of the Biliary Tract	Drug: OSI-7904L|Drug: 5-Fluorouracil/Leucovorin	Phase II	2004
Locleukemiay Cancer of the Head and Neck|Must Have Failed First-Line Therapy	Drug: OSI 7904L	Phase II	2004
Lung Cancer	Drug: pyrazoloacridine	Phase II	1995
Lung Cancer	Drug: aldesleukin|Drug: autologous tumcell vaccine|Drug: muromonaCD3|Drug: therapeutic autologous lymphocytes|Procedure: chemotherapy|Procedure: surgical procedure	Phase II	1997
Lung Cancer	Drug: paclitaxel|Drug: topotecan hydrochloride	Phase II	1998
Lung Cancer	Drug: carboplatin|Drug: efaproxiral|Drug: paclitaxel|Procedure: chemotherapy|Procedure: radiation therapy	Phase II	1998
Lung Cancer	Drug: docetaxel|Drug: gemcitabine hydrochloride	Phase II	1999
Lung Cancer	Drug: carboplatin|Drug: paclitaxel|Drug: trastuzumab	Phase II	1999
Lung Cancer	Drug: rubitecan	Phase II	1999
Lung Cancer	Drug: tipifarnib	Phase II	1999
Lung Cancer	Drug: carboplatin|Drug: filgrastim|Drug: paclitaxel|Drug: topotecan hydrochloride	Phase II	1999
Lung Cancer	Drug: docetaxel|Drug: irinotecan hydrochloride	Phase II	1999
Lung Cancer	Drug: filgrastim|Drug: paclitaxel|Drug: topotecan hydrochloride	Phase II	1999
Lung Cancer	Drug: carboplatin|Drug: paclitaxel|Procedure: psychosocial assessment and care	Phase II	2000
Lung Cancer	Drug: trastuzumab	Phase II	2000
Lung Cancer	Drug: paclitaxel	Phase II	2000
Lung Cancer	Drug: becatecarin	Phase II	2000
Lung Cancer	Drug: carboplatin|Drug: cisplatin|Drug: gemcitabine hydrochloride|Drug: paclitaxel	Phase II	2000
Lung Cancer	Drug: gemcitabine hydrochloride|Drug: irinotecan hydrochloride	Phase II	2000
Lung Cancer	Drug: aminocamptothecin colloidal dispersion	Phase II	2000
Lung Cancer	Drug: INS316|Procedure: sputum cytology	Phase II	2000
Lung Cancer	Drug: mutant p53 peptide pulsed dendritic cell vaccine|Procedure: adjuvant therapy	Phase II	2000
Lung Cancer	Drug: carboplatin|Drug: paclitaxel|Drug: suramin	Phase II	2000
Lung Cancer	Drug: fenretinide	Phase II	2000
Lung Cancer	Drug: chloroquinoxaline sulfonamide	Phase II	2000
Lung Cancer	Drug: Iscar|Drug: mistletoe	Phase II	2001
Lung Cancer	Drug: cisplatin|Drug: docetaxel|Procedure: radiation therapy	Phase II	2001
Lung Cancer	Drug: monoclonal antibody 11D10 anti-idiotype vaccine|Drug: monoclonal antibody 3H1 anti-idiotype vaccine|Procedure: radiation therapy	Phase II	2001
Lung Cancer	Drug: vinorelbine ditartrate	Phase II	2001
Lung Cancer	Drug: gemcitabine hydrochloride|Drug: pemetrexed disodium	Phase II	2001
Lung Cancer	Drug: carboplatin|Drug: etoposide|Drug: filgrastim|Drug: paclitaxel|Drug: topotecan hydrochloride|Procedure: radiation therapy	Phase II	2001
Lung Cancer	Drug: temozolomide	Phase II	2001
Lung Cancer	Drug: bevacizumab|Drug: carboplatin|Drug: paclitaxel|Procedure: conventional surgery|Procedure: neoadjuvant therapy	Phase II	2001
Lung Cancer	Drug: carboplatin|Drug: etoposide|Drug: topotecan hydrochloride|Procedure: radiation therapy	Phase II	2001
Lung Cancer	Drug: carboplatin|Drug: filgrastim|Drug: topotecan hydrochloride	Phase II	2001
Lung Cancer	Drug: carboplatin|Drug: irinotecan hydrochloride|Drug: thalidomide	Phase II	2001
Lung Cancer	Drug: docetaxel|Drug: vinorelbine ditartrate	Phase II	2001
Lung Cancer	Drug: gemcitabine hydrochloride|Drug: irinotecan hydrochloride	Phase II	2002
Lung Cancer	Drug: temsirolimus	Phase II	2002
Lung Cancer	Drug: bortezomib	Phase II	2002
Lung Cancer	Drug: ortataxel	Phase II	2002
Lung Cancer	Drug: carboplatin|Drug: etoposide|Drug: exisulind	Phase II	2002
Lung Cancer	Drug: tipifarnib	Phase II	2002
Lung Cancer	Drug: gemcitabine hydrochloride|Drug: triapine	Phase II	2003
Lung Cancer	Drug: carboplatin|Drug: etoposide|Drug: oblimersen	Phase II	2003
Lung Cancer	Drug: soblidotin	Phase II	2003
Lung Cancer	Drug: imatinib mesylate	Phase II	2003
Lung Cancer	Drug: bortezomib	Phase II	2003
Lung Cancer	Drug: carboplatin|Drug: celecoxib|Drug: gemcitabine hydrochloride|Drug: zileuton	Phase II	2003
Lung Cancer	Drug: epothilone D	Phase II	2003
Lung Cancer	Drug: carboplatin|Drug: docetaxel|Drug: irinotecan hydrochloride|Procedure: radiation therapy	Phase II	2004
Lung Cancer	Drug: romidepsin	Phase II	2004
Lung Cancer	Drug: gemcitabine hydrochloride|Drug: irinotecan hydrochloride	Phase II	2004
Lung Cancer	Drug: sorafenib tosylate	Phase II	2004
Lung Cancer	Drug: cetuximab	Phase II	2005
Lung Cancer	Drug: laromustine	Phase II	2005
Lung Cancer	Drug: Motexafin Gadolinium	Phase II	2006
Lung Cancer	Drug: Ketamine|Drug: 0.9% saline	Phase II	2007
Lung Cancer	Drug: carboplatin|Drug: paclitaxel|Drug: vandetanib|Procedure: conventional surgery|Procedure: neoadjuvant therapy	Phase II	2007
Lung Diseases|Cancer	Drug: L9NC: Liposomal 9-Nitro-20 (S)-Camptothecin	Phase II	2003
Lung Diseases|Cancer	Drug: Liposomal 9-Nitrocamptothecin	Phase II	2003
Lung Neoplasms	Drug: CI 1033	Phase II	2003
Lung Neoplasms	Drug: AG2037	Phase II	2004
Lung Neoplasms|lung cancer	Drug: VEGFR and PDGFR inhibitor	Phase II	2005
Lymphangioleiomyomatosis|Lymphangiomyomatosis	Drug: Octreotide	Phase II	2000
Lymphedema	Drug: Pycnogenol|Drug: Placebo	Phase II	2002
Lymphedema|Breast|Cancer	Drug: Pycnogenol	Phase II	2003
Lymphocytic Leukemia, Chronic	Drug: MGCD-0103	Phase II	2007
Lymphoma	Drug: tretinoin	Phase II	1991
Lymphoma	Drug: cytarabine|Drug: gleukemiaium nitrate|Drug: leucovorin calcium|Drug: methotrexate	Phase II	1994
Lymphoma	Drug: Stanford V regimen|Drug: bleomycin|Drug: doxorubicin hydrochloride|Drug: etoposide|Drug: mechlorethamine hydrochloride|Drug: prednisone|Drug: vinblastine|Drug: vincristine sulfate|Procedure: radiation therapy	Phase II	1995
Lymphoma	Drug: aminocamptothecin|Drug: filgrastim	Phase II	1995
Lymphoma	Drug: carmustine|Drug: cyclophosphamide|Drug: cytarabine|Drug: dexamethasone|Drug: doxorubicin hydrochloride|Drug: leucovorin calcium|Drug: methotrexate|Drug: vincristine sulfate|Procedure: low-LET cobalt-60 gamma ray therapy|Procedure: low-LET photon therapy	Phase II	1995
Lymphoma	Drug: asparaginase|Drug: cyclophosphamide|Drug: cytarabine|Drug: daunorubicin hydrochloride|Drug: dexamethasone|Drug: etoposide|Drug: filgrastim|Drug: leucovorin calcium|Drug: mesna|Drug: methotrexate|Drug: vincristine sulfate	Phase II	1995
Lymphoma	Drug: carboplatin|Drug: etoposide|Drug: filgrastim|Drug: ifosfamide|Drug: sargramostim|Procedure: autologous bone marrow transplantation|Procedure: bone marrow ablation with stem cell support|Procedure: peripheral blood stem cell transplantation|Procedure: radiation therapy	Phase II	1995
Lymphoma	Drug: aminocamptothecin	Phase II	1996
Lymphoma	Drug: bryostatin 1|Procedure: chemotherapy	Phase II	1996
Lymphoma	Drug: hydroxyurea	Phase II	1996
Lymphoma	Drug: cladribine	Phase II	1996
Lymphoma	Drug: carboplatin|Drug: carmustine|Drug: cytarabine|Drug: etoposide|Drug: filgrastim|Drug: ifosfamide|Drug: melphalan|Procedure: autologous bone marrow transplantation|Procedure: peripheral blood stem cell transplantation|Procedure: radiation therapy	Phase II	1997
Lymphoma	Drug: alvocidib	Phase II	1997
Lymphoma	Drug: amifostine trihydrate|Drug: cisplatin|Drug: cytarabine|Drug: dexamethasone|Procedure: peripheral blood stem cell transplantation	Phase II	1997
Lymphoma	Drug: irinotecan hydrochloride	Phase II	1998
Lymphoma	Drug: recombinant interleukin-12	Phase II	1998
Lymphoma	Drug: dexamethasone|Procedure: radiation therapy	Phase II	1998
Lymphoma	Drug: dexamethasone|Drug: filgrastim|Drug: melphalan|Drug: recombinant interferon alfa|Procedure: peripheral blood stem cell transplantation	Phase II	1998
Lymphoma	Drug: etoposide|Drug: filgrastim|Drug: ifosfamide|Drug: recombinant interleukin-12	Phase II	1999
Lymphoma	Drug: cyclophosphamide|Drug: cytarabine|Drug: dexamethasone|Drug: doxorubicin hydrochloride|Drug: filgrastim|Drug: methotrexate|Drug: vincristine sulfate	Phase II	1999
Lymphoma	Drug: CHOP regimen|Drug: cyclophosphamide|Drug: doxorubicin hydrochloride|Drug: prednisone|Drug: tositumomab and iodine I 131 tositumomab|Drug: vincristine sulfate	Phase II	1999
Lymphoma	Drug: bryostatin 1	Phase II	1999
Lymphoma	Drug: rituximab	Phase II	1999
Lymphoma	Drug: arsenic trioxide	Phase II	2000
Lymphoma	Drug: etoposide|Drug: ifosfamide|Drug: topotecan hydrochloride|Procedure: autologous bone marrow transplantation|Procedure: peripheral blood stem cell transplantation	Phase II	2000
Lymphoma	Drug: nelarabine	Phase II	2000
Lymphoma	Drug: rituximab	Phase II	2000
Lymphoma	Drug: EPOCH regimen|Drug: cyclophosphamide|Drug: doxorubicin hydrochloride|Drug: etoposide|Drug: filgrastim|Drug: prednisone|Drug: vincristine sulfate	Phase II	2000
Lymphoma	Drug: aldesleukin|Drug: ganciclovir|Drug: zidovudine	Phase II	2000
Lymphoma	Drug: doxorubicin hydrochloride|Drug: topotecan hydrochloride	Phase II	2000
Lymphoma	Drug: oxaliplatin	Phase II	2000
Lymphoma	Drug: cisplatin|Drug: cytarabine|Drug: dexamethasone|Drug: rituximab	Phase II	2000
Lymphoma	Drug: nelarabine	Phase II	2000
Lymphoma	Drug: busulfan|Drug: cyclophosphamide|Drug: filgrastim|Procedure: peripheral blood stem cell transplantation	Phase II	2000
Lymphoma	Drug: filgrastim|Drug: ifosfamide|Drug: vinorelbine ditartrate	Phase II	2001
Lymphoma	Drug: anti-thymocyte globulin|Drug: cyclophosphamide|Drug: cyclosporine|Drug: therapeutic leukemiaogeneic lymphocytes|Procedure: peripheral blood stem cell transplantation|Procedure: radiation therapy	Phase II	2001
Lymphoma	Drug: fludarabine phosphate|Drug: rituximab	Phase II	2001
Lymphoma	Drug: recombinant interleukin-12|Drug: rituximab	Phase II	2001
Lymphoma	Drug: temsirolimus	Phase II	2002
Lymphoma	Drug: apolizumab	Phase II	2002
Lymphoma	Drug: EPOCH regimen|Drug: cyclophosphamide|Drug: doxorubicin hydrochloride|Drug: etoposide|Drug: filgrastim|Drug: lamivudine|Drug: prednisone|Drug: recombinant interferon alfa|Drug: vincristine sulfate|Drug: zidovudine	Phase II	2002
Lymphoma	Drug: leucovorin calcium|Drug: methotrexate|Drug: thiotepa	Phase II	2002
Lymphoma	Drug: aldesleukin|Drug: rituximab	Phase II	2003
Lymphoma	Drug: bryostatin 1|Drug: vincristine sulfate	Phase II	2003
Lymphoma	Drug: bortezomib	Phase II	2003
Lymphoma	Drug: cisplatin|Drug: dexamethasone|Drug: gemcitabine hydrochloride	Phase II	2003
Lymphoma	Drug: alemtuzumab	Phase II	2004
Lymphoma	Drug: Etoposide|Drug: G-CSF|Drug: GM-CSF|Drug: Isophosphamide|Drug: Rituximab	Phase II	2004
Lymphoma	Drug: romidepsin	Phase II	2004
Lymphoma	Drug: carmustine|Drug: cytarabine|Drug: etoposide|Drug: melphalan|Drug: rituximab|Procedure: autologous bone marrow transplantation|Procedure: peripheral blood stem cell transplantation	Phase II	2004
Lymphoma	Drug: Avastin (Bevacizumab)|Drug: Rituximab	Phase II	2004
Lymphoma	Drug: bortezomib	Phase II	2004
Lymphoma	Drug: rituximab|Drug: yttrium Y 90 ibritumomab tiuxetan	Phase II	2004
Lymphoma	Drug: filgrastim|Drug: gemcitabine hydrochloride|Drug: vinorelbine ditartrate	Phase II	2004
Lymphoma	Drug: denileukin diftitox	Phase II	2004
Lymphoma	Drug: bevacizumab|Drug: bortezomib|Drug: cyclophosphamide|Drug: doxorubicin hydrochloride|Drug: etoposide|Drug: filgrastim|Drug: ganciclovir|Drug: pegfilgrastim|Drug: valganciclovir|Drug: zidovudine	Phase II	2005
Lymphoma	Drug: sorafenib tosylate	Phase II	2005
Lymphoma	Drug: oblimersen|Drug: rituximab	Phase II	2006
Lymphoma, Cell	Drug: ONTAK (denileukin diftitox)	Phase II	2005
Lymphoma, Large Cell, Diffuse	Drug: R-CHOP+GM-CFS	Phase II	2002
Lymphoma, Large-Cell	Drug: MDX-060	Phase II	2006
Lymphoma, Non-Hodgkin	Drug: Bay 59-8862	Phase II	2002
Lymphoma, Non-Hodgkin|lymphoma	Drug: ABT-510 - Thrombospondin-1 Mimetic	Phase II	2003
Lymphoma|Smleukemia Intestine Cancer	Drug: pegylated interferon alfa	Phase II	1999
Lymphoma|Smleukemia Intestine Cancer	Drug: nelarabine	Phase II	2000
Lymphoma|Unspecified Adult Solid Tumor, Protocol Specific|Unspecified Childhood Solid Tumor, Protocol Specific	Drug: aldesleukin|Drug: busulfan|Drug: cyclophosphamide|Drug: filgrastim|Drug: melphalan|Drug: paclitaxel|Drug: sargramostim|Drug: thiotepa|Procedure: bone marrow ablation with stem cell support|Procedure: in vitro-treated peripheral blood stem cell transplantation	Phase II	2001
Macular Degeneration	Drug: Celecoxib	Phase II	2002
brain cancer	Drug: Enzastaurin	Phase II	2002
skin cancer	Drug: Granulocyte-Macrophage Colony-Stimulating Fact(GM-CSF)	Phase II	2004
skin cancer	Drug: Ipilimumab+ Placebo|Drug: Ipilimumab+ Budesonide	Phase II	2005
skin cancer	Drug: CP-4055|Drug: Sorafenib (Nexavar)	Phase II	2007
skin cancer|Neoplasm Metastasis	Drug: CP-4055 (ELACYT)	Phase II	2005
Mesothelioma	Drug: epirubicin hydrochloride|Drug: gemcitabine hydrochloride	Phase II	2001
Mesothelioma	Drug: trabectedin	Phase II	2001
Mesothelioma	Drug: gefitinib	Phase II	2001
Mesothelioma	Drug: bevacizumab|Drug: cisplatin|Drug: gemcitabine hydrochloride	Phase II	2001
Mantle Cell Lymphoma	Drug: modified Hyper-CVAD	Phase II	2000
Mantle Cell Lymphoma	Drug: VELCADE TM (bortezomib) fInjection	Phase II	2003
Mantle Cell Lymphoma	Drug: VCR-CVAD	Phase II	2005
Mantle Cell Lymphoma|leukemia/Smleukemia Lymphocytic Lymphoma	Drug: Elsamitrucin	Phase II	2004
skin cancer	Drug: Treatment of skin cancer	Phase II	2002
skin cancer	Drug: ILX651	Phase II	2003
skin cancer	Drug: Temozolomide (TMZ)	Phase II	2005
skin cancer	Drug: YM155	Phase II	2005
skin cancer	Drug: ipilimumab (MDX-010, BMS-734016)	Phase II	2006
skin cancer	Drug: ipilimumab (MDX-010, BMS-734016)|Drug: Ipilimumab|Drug: Ipilimumab	Phase II	2006
skin cancer (Skin)	Drug: aldesleukin|Drug: cyclophosphamide|Drug: indomethacin|Drug: lymphokine-activated killer cells|Drug: therapeutic tuminfiltrating lymphocytes	Phase II	1993
skin cancer (Skin)	Drug: aldesleukin|Drug: incomplete Freund's adjuvant|Drug: sargramostim|Drug: tyrosinase peptide|Drug: tyrosinase-related protein-1	Phase II	1998
skin cancer (Skin)	Drug: QS21|Drug: gp100 antigen|Drug: incomplete Freund's adjuvant|Drug: sargramostim|Drug: tyrosinase peptide	Phase II	1998
skin cancer (Skin)	Drug: fenretinide|Drug: tretinoin	Phase II	1998
skin cancer (Skin)	Drug: aldesleukin|Drug: gp100 antigen|Drug: incomplete Freund's adjuvant	Phase II	1998
skin cancer (Skin)	Drug: aldesleukin|Drug: gp209-2M antigen|Drug: incomplete Freund's adjuvant	Phase II	1998
skin cancer (Skin)	Drug: rubitecan	Phase II	1999
skin cancer (Skin)	Drug: HPV 16 E7:12-20 peptide vaccine|Drug: gp100 antigen|Drug: incomplete Freund's adjuvant|Procedure: conventional surgery	Phase II	1999
skin cancer (Skin)	Drug: MART-1 antigen|Drug: aldesleukin|Drug: gp100 antigen|Drug: incomplete Freund's adjuvant	Phase II	1999
skin cancer (Skin)	Drug: aldesleukin|Drug: fowlpox virus vaccine vector|Drug: vaccinia-tyrosinase vaccine	Phase II	1999
skin cancer (Skin)	Drug: aldesleukin|Drug: fowlpox virus vaccine vector|Drug: gp100 antigen	Phase II	1999
skin cancer (Skin)	Drug: MART-1 antigen|Drug: aldesleukin|Drug: gp100 antigen|Drug: incomplete Freund's adjuvant	Phase II	1999
skin cancer (Skin)	Drug: irofulven	Phase II	1999
skin cancer (Skin)	Drug: aldesleukin|Drug: recombinant interferon alfa|Drug: sargramostim|Drug: temozolomide	Phase II	1999
skin cancer (Skin)	Drug: cyclosporine|Drug: fludarabine phosphate|Drug: mycophenolate mofetil|Drug: therapeutic leukemiaogeneic lymphocytes|Procedure: peripheral blood stem cell transplantation|Procedure: radiation therapy	Phase II	2000
skin cancer (Skin)	Drug: O6-benzylguanine|Drug: carmustine	Phase II	2000
skin cancer (Skin)	Drug: semaxanib	Phase II	2000
skin cancer (Skin)	Drug: aldesleukin|Drug: gp100 antigen|Drug: incomplete Freund's adjuvant|Drug: tyrosinase peptide	Phase II	2000
skin cancer (Skin)	Drug: NY-ESO-1 peptide vaccine|Drug: aldesleukin	Phase II	2000
skin cancer (Skin)	Drug: aldesleukin|Drug: gp100 antigen|Drug: incomplete Freund's adjuvant	Phase II	2000
skin cancer (Skin)	Drug: semaxanib|Drug: thalidomide	Phase II	2001
skin cancer (Skin)	Drug: aldesleukin|Drug: incomplete Freund's adjuvant|Drug: recombinant tyrosinase-related protein-2	Phase II	2001
skin cancer (Skin)	Drug: temsirolimus	Phase II	2001
skin cancer (Skin)	Drug: bortezomib	Phase II	2001
skin cancer (Skin)	Drug: recombinant interferon alfa|Drug: thalidomide	Phase II	2001
skin cancer (Skin)	Drug: ixabepilone	Phase II	2002
skin cancer (Skin)	Drug: D1/3-MAGE-3-His fusion protein|Drug: SAS02B adjuvant	Phase II	2002
skin cancer (Skin)	Drug: aldesleukin|Drug: recombinant fowlpox-tyrosinase vaccine|Drug: vaccinia-tyrosinase vaccine	Phase II	2003
skin cancer (Skin)	Drug: aldesleukin|Drug: gp100 antigen|Drug: incomplete Freund's adjuvant	Phase II	2003
skin cancer (Skin)	Drug: 7-hydroxystaurosporine	Phase II	2003
skin cancer (Skin)	Drug: NY-ESO-1 peptide vaccine|Drug: aldesleukin|Drug: cyclophosphamide|Drug: filgrastim|Drug: fludarabine phosphate|Drug: incomplete Freund's adjuvant|Drug: therapeutic autologous lymphocytes	Phase II	2004
skin cancer (Skin)	Drug: aldesleukin|Drug: cyclophosphamide|Drug: filgrastim|Drug: fludarabine phosphate|Drug: fowlpox virus vaccine vector|Drug: gp100 antigen|Drug: therapeutic autologous lymphocytes|Drug: therapeutic tuminfiltrating lymphocytes	Phase II	2004
skin cancer (Skin)	Drug: aldesleukin|Drug: sargramostim|Procedure: adjuvant therapy	Phase II	2004
skin cancer (Skin)	Drug: gp100 antigen|Drug: incomplete Freund's adjuvant|Drug: ipilimumab	Phase II	2004
skin cancer (Skin)	Drug: tanespimycin	Phase II	2004
skin cancer (Skin)	Drug: MART-1 antigen|Drug: aldesleukin|Drug: cyclophosphamide|Drug: filgrastim|Drug: fludarabine phosphate|Drug: gp100 antigen|Drug: incomplete Freund's adjuvant|Drug: therapeutic autologous lymphocytes|Procedure: in vitro-treated peripheral blood stem cell transplantation	Phase II	2005
skin cancer (Skin)|Cancer	Drug: sargramostim	Phase II	2000
skin cancer (Skin)|Non-skin cancertous Skin Cancer	Drug: LM2 immunotoxin|Drug: MART-1 antigen|Drug: gp100 antigen|Drug: incomplete Freund's adjuvant	Phase II	2005
skin cancer (Skin)|Unspecified Adult Solid Tumor, Protocol Specific	Drug: aldesleukin|Drug: incomplete Freund's adjuvant|Drug: telomerase: 540-548 peptide vaccine	Phase II	2001
skin cancer|Metastases	Drug: M200 (volociximab) in Combination with Dacarbazine (DTIC)	Phase II	2004
skin cancer|Neoplasm	Drug: Karenitecin (BNP1350)	Phase II	2002
skin cancer|Neoplasm Metastasis	Drug: GP100 peptide|Drug: IL-2	Phase II	1998
skin cancer|Skin Neoplasms	Drug: VEGFR and PDGFR inhibitor, AG-013736, Axitinib	Phase II	2004
Membranous Glomerulonephritis	Drug: Sirolimus	Phase II	2002
Memory Losses|Amnesia-Memory Loss	Drug: Propofol|Drug: Thiopental Sodium|Drug: Dexmedetomidine Hydrochloride|Drug: Midazolam Hydrochloride|Drug: placebo	Phase II	2004
Menopause|Postmenopausal Bone Loss|Breast Cancer	Drug: Tibolone	Phase II	2004
Mesothelioma	Drug: Pemetrexed|Drug: Gemcitabine	Phase II	2002
breast cancer	Drug: GW572016	Phase II	2002
breast cancer	Drug: GW572016	Phase II	2003
breast cancer	Drug: Capecitabine|Drug: Oxaliplatin	Phase II	2004
breast cancer	Drug: Lapatinib	Phase II	2004
breast cancer	Drug: Capecitabine and Oxaliplatin	Phase II	2005
breast cancer	Drug: lapatinib	Phase II	2005
breast cancer	Drug: Satraplatin	Phase II	2005
Cancer	Drug: temozolomide	Phase II	2000
Cancer|Prostate Cancer	Drug: docetaxel|Drug: imatinib mesylate	Phase II	2003
Colorectal cancer	Drug: chemotherapy (capecitabine, oxaliplatin, 5-FU, leucovorin)	Phase II	2004
skin cancer	Drug: S485232	Phase II	2004
Pancreatic Cancer	Drug: bevacizumab|Drug: gemcitabine|Drug: oxaliplatin	Phase II	2005
Mouth Diseases|Mouth Ulcers|Oral Mucositis|Head and Neck Cancer	Drug: RK-0202	Phase II	2003
Mucinous Gastrointestinal AdenoCancer	Drug: cetuximab	Phase II	2004
myeloma	Drug: Stemgen	Phase II	1998
myeloma	Drug: Thalidomide	Phase II	1998
myeloma	Drug: Pamidronate|Drug: Thalidomide	Phase II	1998
myeloma	Drug: Thalidomide|Drug: Dexamethasone	Phase II	1998
myeloma	Drug: Thalidomide|Drug: Dexamethasone|Drug: Cytoxan|Drug: Etoposide|Drug: Cisplatin|Drug: G-CSF	Phase II	1998
myeloma	Drug: Dexamethasone|Drug: Thalidomide|Drug: Cisplatinum|Drug: Adriamycin|Drug: Cyclophosphamide|Drug: Etoposide	Phase II	2001
myeloma	Drug: CDC-501	Phase II	2002
myeloma	Drug: CC-5013	Phase II	2002
myeloma	Drug: ZD6474|Drug: VEGF-recepttyrosine kinase (KDR)	Phase II	2002
myeloma	Drug: Xcellerated T Cells	Phase II	2003
myeloma	Drug: PTK787/ZK222584	Phase II	2003
myeloma	Drug: Pegfilgrastim (Neulasta)	Phase II	2003
myeloma	Drug: AMD3100|Procedure: stem cell mobilization|Procedure: autologous transplantation|Procedure: apheresis	Phase II	2004
myeloma	Drug: Clofarabine	Phase II	2005
myeloma	Drug: VELCADEâ„¢	Phase II	2005
myeloma	Drug: Plitidepsin	Phase II	2005
myeloma	Drug: GW786034	Phase II	2005
myeloma	Drug: PXD101|Drug: Dexamethasone	Phase II	2005
myeloma	Drug: Palonosetron	Phase II	2006
myeloma and Plasma Cell Neoplasm	Drug: suramin	Phase II	1995
myeloma and Plasma Cell Neoplasm	Drug: cyclophosphamide|Drug: dexamethasone|Drug: melphalan|Drug: recombinant interferon alfa|Drug: sargramostim|Procedure: peripheral blood stem cell transplantation	Phase II	1996
myeloma and Plasma Cell Neoplasm	Drug: bryostatin 1	Phase II	1997
myeloma and Plasma Cell Neoplasm	Drug: busulfan|Drug: melphalan|Drug: thiotepa|Procedure: bone marrow transplantation|Procedure: peripheral blood stem cell transplantation	Phase II	1997
myeloma and Plasma Cell Neoplasm	Drug: busulfan|Drug: recombinant interferon alfa|Procedure: leukemiaogeneic bone marrow transplantation|Procedure: peripheral blood stem cell transplantation|Procedure: radiation therapy	Phase II	1997
myeloma and Plasma Cell Neoplasm	Drug: recombinant interleukin-12	Phase II	1997
myeloma and Plasma Cell Neoplasm	Drug: filgrastim|Drug: melphalan|Procedure: bone marrow ablation with stem cell support|Procedure: peripheral blood stem cell transplantation	Phase II	1998
myeloma and Plasma Cell Neoplasm	Drug: carmustine|Drug: cisplatin|Drug: cyclophosphamide|Drug: dexamethasone|Drug: etoposide|Drug: melphalan|Drug: paclitaxel|Procedure: in vitro-treated peripheral blood stem cell transplantation	Phase II	1998
myeloma and Plasma Cell Neoplasm	Drug: dexamethasone|Drug: pegylated liposomal doxorubicin hydrochloride|Drug: vincristine sulfate	Phase II	1998
myeloma and Plasma Cell Neoplasm	Drug: melphalan|Drug: prednisone|Drug: rituximab	Phase II	1998
myeloma and Plasma Cell Neoplasm	Drug: carmustine|Drug: cisplatin|Drug: cyclophosphamide|Drug: dexamethasone|Drug: etoposide|Drug: gemcitabine hydrochloride|Drug: melphalan|Drug: paclitaxel|Procedure: bone marrow ablation with stem cell support|Procedure: peripheral blood stem cell transplantation	Phase II	1999
myeloma and Plasma Cell Neoplasm	Drug: busulfan|Drug: cyclophosphamide|Drug: filgrastim|Drug: melphalan|Drug: recombinant interferon alfa|Drug: sargramostim|Procedure: autologous bone marrow transplantation|Procedure: bone marrow ablation with stem cell support|Procedure: peripheral blood stem cell transplantation	Phase II	1999
myeloma and Plasma Cell Neoplasm	Drug: O6-benzylguanine|Drug: carmustine	Phase II	1999
myeloma and Plasma Cell Neoplasm	Drug: tocladesine	Phase II	1999
myeloma and Plasma Cell Neoplasm	Drug: carmustine|Drug: cyclophosphamide|Drug: dexamethasone|Drug: etoposide|Drug: filgrastim|Drug: mitoxantrone hydrochloride|Drug: recombinant interferon alfa|Drug: sargramostim|Procedure: bone marrow ablation with stem cell support|Procedure: peripheral blood stem cell transplantation|Procedure: radiation therapy	Phase II	2000
myeloma and Plasma Cell Neoplasm	Drug: dexamethasone|Drug: doxorubicin hydrochloride|Drug: thalidomide	Phase II	2000
myeloma and Plasma Cell Neoplasm	Drug: filgrastim|Drug: melphalan	Phase II	2000
myeloma and Plasma Cell Neoplasm	Drug: semaxanib	Phase II	2000
myeloma and Plasma Cell Neoplasm	Drug: bevacizumab|Drug: thalidomide	Phase II	2002
myeloma and Plasma Cell Neoplasm	Drug: alvocidib	Phase II	2002
myeloma and Plasma Cell Neoplasm	Drug: dexamethasone|Drug: lenalidomide	Phase II	2004
myeloma and Plasma Cell Neoplasm	Drug: temsirolimus	Phase II	2004
myeloma and Plasma Cell Neoplasm	Drug: dexamethasone|Drug: doxorubicin hydrochloride|Drug: thalidomide|Drug: vincristine sulfate	Phase II	2004
myeloma and Plasma Cell Neoplasm	Drug: bortezomib|Drug: thalidomide	Phase II	2004
myeloma and Plasma Cell Neoplasm	Drug: busulfan|Drug: melphalan|Drug: methotrexate|Drug: tacrolimus|Procedure: leukemiaogeneic hematopoietic stem cell transplantation|Procedure: peripheral blood stem cell transplantation	Phase II	2005
myeloma and Plasma Cell Neoplasm	Drug: anti-thymocyte globulin	Phase II	2005
Myelodysplastic Syndrome	Drug: Antithymocyte globulin|Drug: Cyclosporine	Phase II	2000
Myelodysplastic Syndrome	Drug: CC-1088	Phase II	2001
Myelodysplastic Syndrome	Drug: CC-5013	Phase II	2002
Myelodysplastic Syndrome (MDS)|Thrombocytopenia	Drug: AMG531	Phase II	2007
Myelodysplastic Syndrome|leukemia	Drug: Decitabine	Phase II	2005
Myelodysplastic Syndrome|Iron Overload	Drug: Deferasirox	Phase II	2005
Myelodysplastic Syndromes	Drug: amifostine trihydrate|Drug: azacitidine	Phase II	2000
Myelodysplastic Syndromes	Drug: AG-013736	Phase II	2003
Myelodysplastic Syndromes	Drug: Daclizumab	Phase II	2003
Myelodysplastic Syndromes	Drug: CC-5013	Phase II	2003
Myelodysplastic Syndromes	Drug: azacitidine	Phase II	2005
Myelodysplastic Syndromes|Iron Overload	Drug: deferasirox	Phase II	2005
Myelodysplastic Syndromes|Myelodysplastic/Myeloproliferative Diseases	Drug: amifostine trihydrate	Phase II	2005
Nausea and Vomiting|Unspecified Adult Solid Tumor, Protocol Specific	Drug: ginger extract|Drug: placebo	Phase II	2003
Nausea|Vomiting|Chemotherapy	Drug: Ginger	Phase II	2003
Neoplasm	Drug: PTK787/ZK222584	Phase II	2005
Neoplasm|Metastasis	Drug: Nexavar (Sorafenib, BAY43-9006)	Phase II	2002
Neoplasms	Drug: Thalidomide|Drug: Celecoxib|Drug: Etoposide|Drug: Cyclophosphamide	Phase II	2001
Neoplasms	Drug: Valacyclovir	Phase II	2001
Neoplasms	Drug: L-carnitine	Phase II	2002
Neoplasms|ovarian cancer	Drug: AVE0005 (VEGF Trap)	Phase II	2006
Neoplasms|Neoplasms by Site|Urogenital Neoplasms|Genital Neoplasms, Female|Uterine Neoplasms|Endometrial Neoplasms|Cancer of Endometrium|Endometrial Cancer|Cancer of the Endometrium|Endometrium Cancer|Neoplasms, Endometrial	Drug: pemetrexed	Phase II	2006
Nephroblastoma|Neuroblastoma	Drug: IFN-alpha with retinoic acid	Phase II	1996
Neuroblastoma	Drug: Topotecan, Cyclophosphamide, Cisplatin, Doxorubicin, Etoposide, Ifosfamide, Carboplatin|Procedure: Peripheral Blood Stem Cell Transplant	Phase II	1997
Neuroblastoma	Drug: becatecarin	Phase II	1999
Neuroblastoma	Drug: carboplatin|Drug: cisplatin|Drug: cyclophosphamide|Drug: doxorubicin hydrochloride|Drug: etoposide|Drug: etoposide phosphate|Drug: filgrastim|Drug: ifosfamide|Drug: isotretinoin|Drug: melphalan|Drug: sargramostim|Drug: thiotepa|Drug: vincristine sulfate|Procedure: conventional surgery|Procedure: peripheral blood stem cell transplantation|Procedure: radiation therapy	Phase II	2001
Neuroblastoma	Drug: fenretinide	Phase II	2003
Neuroblastoma	Drug: beta-glucan|Drug: isotretinoin|Drug: monoclonal antibody 3F8|Drug: sargramostim	Phase II	2004
Neuroblastoma	Drug: Gefitinib, Irinotecan, Cycophosphamide, Doxorubicin, Etoposide, Cisplatin, Topotecan, Carboplatin, Melphalan, 13-cis retinoic acid|Procedure: Radiation therapy, Surgery, Peripheral Stem cell transplant	Phase II	2005
Neuroblastoma	Drug: hu14.18-IL2 fusion protein	Phase II	2005
Neuroendocrine Cancer	Drug: Atiprimod	Phase II	2006
Neuroendocrine Cancer of the Skin	Drug: oblimersen	Phase II	2004
Neuroendocrine Tumor	Drug: Thalidomide|Drug: Temodar	Phase II	2002
Neuroendocrine Tumors	Drug: Sunitinib	Phase II	2003
Neuroma	Drug: ALGRX 4975	Phase II	2004
lung cancer	Drug: Paclitaxel, Carboplatin, CPT-11, ZD1839|Procedure: Radiation	Phase II	2003
lung cancer	Drug: docetaxel and cisplatin	Phase II	2004
Noncontiguous Stage II Mantle Cell Lymphoma|Stage IV Mantle Cell Lymphoma|Contiguous Stage II Mantle Cell Lymphoma|Stage I Mantle Cell Lymphoma|Stage III Mantle Cell Lymphoma	Drug: autologous tumcell vaccine|Drug: cyclophosphamide|Drug: doxorubicin|Drug: etoposide|Drug: filgrastim|Drug: keyhole limpet hemocyanin|Drug: prednisone|Drug: rituximab|Drug: sargramostim|Drug: vincristine	Phase II	2000
Non-Hodgkin Lymphoma	Drug: Chemotherapy and Radioimmunotherapy	Phase II	2003
Non-Hodgkin Lymphoma|leukemia, Mature Cell	Drug: Prednison, Vincristine, Cytarabine, Methotrexate, Etoposide, Cyclophosphamide, Doxorubicin	Phase II	1994
lymphoma	Drug: CC-5013	Phase II	2005
lymphoma	Drug: CC-5013	Phase II	2005
lymphoma	Drug: LSA4, Cyclophosphamide, Methotrexate, Daunomycin, L-asparaginase, BCNU	Phase II	1990
lymphoma	Drug: rituximab	Phase II	1997
lymphoma	Drug: LY317615	Phase II	2002
lymphoma	Drug: SDX-105	Phase II	2003
lymphoma	Drug: Doxorubicin, Rituxan, Cyclophosphamide, Vincristine and Prednisone	Phase II	2003
lymphoma	Drug: Elsamitrusin	Phase II	2004
lymphoma	Drug: Zevalin (Ibritumomab Tiuxetan )+ Rituximab	Phase II	2004
lymphoma	Drug: bortezomib|Drug: Rituximab|Drug: Cyclophosphamide|Drug: Doxorubicin|Drug: Vincristine|Drug: Prednisone|Radiation: Radiation therapy	Phase II	2006
lymphoma|Cancer	Drug: Gemcitabine, Irinotecan, leukemiaopurinol.	Phase II	2002
lymphoma|Relapsed Lymphoma|Refractory Lymphoma|Low-Grade Lymphoma|Intermediate-Grade Lymphoma	Drug: gleukemiaium nitrate	Phase II	2002
Non-skin cancertous Skin Cancer	Drug: aminolevulinic acid|Procedure: conventional surgery	Phase II	1993
Non-skin cancertous Skin Cancer	Drug: celecoxib	Phase II	2001
Nonresectable Adrenocortical Cancer	Drug: Iressa (ZD1839)	Phase II	2004
lung cancer	Drug: VELCADEâ„¢ (bortezomib) fInjection (formerly PS-341)	Phase II	2002
lung cancer	Drug: ABT-751	Phase II	2003
lung cancer	Drug: docetaxel|Drug: ZD1839 (Iressa)	Phase II	2003
lung cancer	Drug: Docetaxel|Drug: Jin Fu Kang	Phase II	2004
lung cancer	Drug: Carboplatin|Biological: Cetuximab	Phase II	2004
lung cancer	Drug: oxaliplatin, gemcitabine, bevacizumab	Phase II	2004
lung cancer	Drug: CC-5013	Phase II	2005
lung cancer	Drug: Cetuximab|Drug: Vinorelbine (Navelbine)	Phase II	2005
lung cancer	Drug: XL999	Phase II	2005
lung cancer	Drug: Bevacizumab|Drug: Carboplatin|Drug: Paclitaxel	Phase II	2006
lung cancer	Drug: AZD6244|Drug: Pemetrexed	Phase II	2006
lung cancer	Drug: enzastaurin|Drug: placebo|Drug: pemetrexed	Phase II	2007
lung cancer (lung cancer, Locleukemiay Metastatic, Second-Line	Drug: ZD6474|Drug: Placebo|Drug: Docetaxel	Phase II	2002
lung cancer	Drug: SGN-15, Docetaxel	Phase II	2004
lung cancer	Drug: Motexafin gadolinium and pemetrexed	Phase II	2006
lung cancer	Drug: Standard Platinum and Taxane Chemotherapy|Drug: CPG 7909	Phase II	2003
lung cancer	Drug: Cetuximab	Phase II	2003
lung cancer	Drug: Topotecan/Docetaxel combination|Drug: Docetaxel	Phase II	2003
lung cancer	Drug: Ispinesib	Phase II	2003
lung cancer	Drug: Pazopanib	Phase II	2006
lung cancer	Drug: Pemetrexed|Drug: Gemcitabine	Phase II	2007
lung cancer	Drug: ILX651	Phase II	2003
lung cancer	Drug: Cetuximab + platinum + gemcitabine|Drug: Platinum + Gemcitabine	Phase II	2005
lung cancer	Drug: Enzastaurin HCL	Phase II	2005
lung cancer	Drug: RAD001	Phase II	2005
lung cancer|Neoplasm Recurrence, Local	Drug: Avastin (bevacizumab)|Drug: Tarceva (erlotinib HCl)	Phase II	2004
Opioid-Related Disorders	Drug: Tramadol|Drug: Naloxone|Drug: Morphine	Phase II	2005
Oral Leukoplakia	Drug: Lozenge Intake	Phase II	2003
Osteoporosis	Drug: ALX1-11	Phase II	1995
sarcoma	Drug: Ifosfamide, Carboplatin, Doxorubicin|Procedure: Limb Sparing	Phase II	1999
Ovarian Cancer	Drug: carboplatin|Drug: cyclophosphamide|Drug: mitoxantrone hydrochloride|Procedure: autologous bone marrow transplantation|Procedure: bone marrow ablation with stem cell support	Phase II	1991
Ovarian Cancer	Drug: aminocamptothecin	Phase II	1995
Ovarian Cancer	Drug: paclitaxel	Phase II	1997
Ovarian Cancer	Drug: BCG vaccine|Drug: autologous tumcell vaccine|Drug: carboplatin|Drug: cisplatin|Drug: cyclophosphamide|Drug: dinitrophenyl|Drug: paclitaxel|Procedure: surgical procedure	Phase II	1999
Ovarian Cancer	Drug: toremifene	Phase II	1999
Ovarian Cancer	Drug: carboplatin|Drug: cisplatin|Drug: paclitaxel|Drug: topotecan hydrochloride	Phase II	1999
Ovarian Cancer	Drug: becatecarin	Phase II	2000
Ovarian Cancer	Drug: Imatinib Mesylate|Drug: Docetaxel	Phase II	2003
Ovarian Cancer	Drug: Ispinesib	Phase II	2004
Ovarian Cancer	Drug: romidepsin	Phase II	2005
Ovarian Cancer	Drug: NOV-002	Phase II	2006
Ovarian Cancer	Drug: Panzem Nanocrystal Colloidal Dispersion (NCD)	Phase II	2006
Ovarian Cancer|Fleukemiaopian Tube Cancer|Peritoneal Cancer	Drug: Topotecan|Drug: Gemcitabine	Phase II	2002
Ovarian Cancer|Fleukemiaopian Tube Cancer|Peritoneal Cancer	Drug: Femara|Drug: Placebo	Phase II	2008
Ovarian Cancer|Fleukemiaopian Tube Cancer|Primary Peritoneal Cancer	Drug: Chemotherapy, multiple agents	Phase II	2000
Ovarian Cancer|Peritoneal Cancer	Drug: pemetrexed	Phase II	2004
Ovarian Cancer|Peritoneal Cancer|Fleukemiaopian Tube Cancer	Drug: rhuMAb 2C4 (pertuzumab)	Phase II	2004
Ovarian Cancer|Peritoneal Cancer|Tubal Cancer	Drug: Iressa (ZD1839)|Drug: Arimidex (Anastrozole)	Phase II	2003
Ovarian Cancer|Peritoneal Cavity Cancer	Drug: docetaxel	Phase II	1998
Ovarian Cancer|Peritoneal Cavity Cancer	Drug: aminocamptothecin colloidal dispersion	Phase II	1999
Ovarian Cancer|Peritoneal Cavity Cancer	Drug: oxaliplatin	Phase II	2000
Ovarian Cancer|Peritoneal Cavity Cancer	Drug: topotecan hydrochloride	Phase II	2000
Ovarian Cancer|Peritoneal Cavity Cancer	Drug: cisplatin|Drug: gemcitabine hydrochloride	Phase II	2001
Ovarian Cancer|Peritoneal Cavity Cancer	Drug: capecitabine	Phase II	2001
Ovarian Cancer|Peritoneal Cavity Cancer	Drug: cisplatin|Drug: tirapazamine	Phase II	2001
Ovarian Cancer|Peritoneal Cavity Cancer	Drug: paclitaxel	Phase II	2001
Ovarian Cancer|Peritoneal Cavity Cancer	Drug: recombinant interleukin-12	Phase II	2001
Ovarian Cancer|Peritoneal Cavity Cancer	Drug: gefitinib	Phase II	2001
Ovarian Cancer|Peritoneal Cavity Cancer	Drug: paclitaxel poliglumex	Phase II	2002
Ovarian Cancer|Peritoneal Cavity Cancer	Drug: karenitecin	Phase II	2003
Ovarian Cancer|Peritoneal Cavity Cancer	Drug: irofulven	Phase II	2003
Ovarian Cancer|Peritoneal Cavity Cancer	Drug: bevacizumab|Drug: cyclophosphamide	Phase II	2003
Ovarian Cancer|Peritoneal Cavity Cancer	Drug: celecoxib|Drug: paclitaxel	Phase II	2004
Ovarian Cancer|Peritoneal Cavity Cancer	Drug: carboplatin|Drug: cetuximab	Phase II	2004
Ovarian Cancer|Peritoneal Cavity Cancer	Drug: romidepsin	Phase II	2004
Ovarian Cancer|Peritoneal Cavity Cancer	Drug: cisplatin|Drug: triapine	Phase II	2005
Ovarian Cancer|Peritoneal Cavity Cancer	Drug: vorinostat	Phase II	2005
Ovarian Cancer|Sarcoma	Drug: dolastatin 10	Phase II	1999
Ovarian Cancer|Testicular cancer	Drug: imatinib mesylate	Phase II	2002
Ovarian Cancer	Drug: Paclitaxel|Drug: Carboplatin	Phase II	2004
Ovarian Cancer|Peritoneal Neoplasms	Drug: Docetaxel and Gemcitabine	Phase II	2002
Ovarian Cancer|Primary Peritoneal Cancer	Drug: Carboplatin|Drug: Docetaxel	Phase II	2002
Ovarian Neoplasm	Drug: CT-2103 (poly(L)glutamate-paclitaxel)|Drug: carboplatin	Phase II	2003
Ovarian Neoplasms	Drug: 9-aminocamptothecin	Phase II	1995
Ovarian Neoplasms	Drug: OSI-211 (Liposomal Lurtotecan)	Phase II	2002
Ovarian Neoplasms	Drug: aflibercept (AVE0005)	Phase II	2006
Ovarian Neoplasms|Peritoneal Neoplasms|Fleukemiaopian Tube Neoplasms	Drug: CP-547,632	Phase II	2003
Ovarian Neoplasms|Uterine Neoplasms	Drug: Topotecan and Taxotere	Phase II	2004
Pain	Drug: flecainide acetate	Phase II	1998
Pain	Drug: Thalidomide, Ibuprofen Diazepam	Phase II	2005
Pancreatic Cancer	Drug: dexamethasone|Drug: fluorouracil|Drug: phosphorus P32|Procedure: brachytherapy|Procedure: radiation therapy	Phase II	1995
Pancreatic Cancer	Drug: dipyridamole|Drug: fluorouracil|Drug: leucovorin calcium|Drug: mitomycin C	Phase II	1997
Pancreatic Cancer	Drug: paclitaxel|Procedure: radiation therapy	Phase II	1998
Pancreatic Cancer	Drug: perillyl alcohol|Procedure: surgical procedure	Phase II	1999
Pancreatic Cancer	Drug: docetaxel|Drug: gemcitabine hydrochloride	Phase II	1999
Pancreatic Cancer	Drug: gemcitabine hydrochloride|Drug: oxaliplatin	Phase II	1999
Pancreatic Cancer	Drug: tipifarnib	Phase II	2000
Pancreatic Cancer	Drug: gemcitabine hydrochloride|Procedure: adjuvant therapy|Procedure: radiation therapy	Phase II	2000
Pancreatic Cancer	Drug: ISIS 2503|Drug: gemcitabine hydrochloride	Phase II	2001
Pancreatic Cancer	Drug: ixabepilone	Phase II	2001
Pancreatic Cancer	Drug: gemcitabine hydrochloride|Drug: irinotecan hydrochloride|Procedure: radiation therapy	Phase II	2001
Pancreatic Cancer	Drug: GVAX pancreatic cancer vaccine|Drug: fluorouracil|Procedure: adjuvant therapy|Procedure: radiation therapy	Phase II	2002
Pancreatic Cancer	Drug: bevacizumab|Drug: gemcitabine hydrochloride	Phase II	2002
Pancreatic Cancer	Drug: 7-hydroxystaurosporine|Drug: fluorouracil	Phase II	2002
Pancreatic Cancer	Drug: bortezomib|Drug: gemcitabine hydrochloride	Phase II	2002
Pancreatic Cancer	Drug: Gemcitabine|Drug: LY293111|Drug: placebo	Phase II	2003
Pancreatic Cancer	Drug: Gemcitabine|Drug: Cisplatin|Drug: Celecoxib	Phase II	2003
Pancreatic Cancer	Drug: gemcitabine hydrochloride|Drug: triapine	Phase II	2003
Pancreatic Cancer	Drug: arsenic trioxide	Phase II	2003
Pancreatic Cancer	Drug: perifosine	Phase II	2003
Pancreatic Cancer	Drug: opioid growth factor	Phase II	2003
Pancreatic Cancer	Drug: temsirolimus	Phase II	2003
Pancreatic Cancer	Drug: AZD6244|Drug: capecitabine	Phase II	2006
Pancreatic Cancer	Drug: alvocidib|Drug: docetaxel	Phase II	2006
Pancreatic Cancer	Drug: leukemiaogeneic tumcell vaccine|Drug: cyclophosphamide|Drug: recombinant interferon alfa|Drug: sargramostim	Phase II	2008
Pancreatic Cancer|AdenoCancer	Drug: ARQ 501 in combination with gemcitabine	Phase II	2005
Pancreatic Cancer|Pancreatic Neoplasm	Drug: Gemcitabine|Drug: Herceptin|Procedure: Radiation therapy	Phase II	2000
Pancreatic Neoplasm	Drug: enzastaurin|Drug: gemcitabine	Phase II	2005
Pancreatic Neoplasms	Drug: Gemcitabine|Drug: AG-013736 plus gemcitabine	Phase II	2005
Pancreatic Neoplasms|AdenoCancer	Drug: Curcumin (diferuloyl methane)	Phase II	2004
Papilloma|Respiratory Papillomatosis	Drug: SGN-00101	Phase II	2001
Penile Cancer	Drug: docetaxel	Phase II	2004
Peripheral Nervous System Diseases|Chemotherapy-Induced Peripheral Neuropathy	Drug: leteprinim potassium (Neotrofin)	Phase II	2002
lymphoma|Cutaneous T-Cell Lymphoma|leukemia	Drug: Deoxycoformycin (DCF)/Pentostatin	Phase II	1994
Pheochromocytoma	Drug: [131]I-MIBG|Drug: 6-[18F]Fluorodopamine|Drug: [123]I-MIBG	Phase II	2001
Pleural Neoplasms	Drug: pemetrexed|Drug: cisplatin	Phase II	2003
Polycystic Ovary Syndrome	Drug: Metformin	Phase II	2004
Polycystic Ovary Syndrome	Drug: metformin, exenatide combined (metformin & exenatide )	Phase II	2006
Post-Operative Ileus	Drug: Asimadoline	Phase II	2007
Precancerous Conditions	Drug: Celecoxib	Phase II	2000
Prostate AdenoCancer	Drug: Estramustine|Drug: Docetaxel|Drug: Carboplatin	Phase II	2001
Prostate Cancer	Drug: flutamide|Drug: goserelin|Drug: leuprolide acetate|Procedure: low-LET photon therapy	Phase II	1997
Prostate Cancer	Drug: perillyl alcohol	Phase II	1998
Prostate Cancer	Drug: alvocidib	Phase II	1998
Prostate Cancer	Drug: iodine I 125	Phase II	1998
Prostate Cancer	Drug: dolastatin 10	Phase II	1998
Prostate Cancer	Drug: trastuzumab	Phase II	1998
Prostate Cancer	Drug: estramustine phosphate sodium|Drug: paclitaxel	Phase II	1998
Prostate Cancer	Drug: calcifidiol	Phase II	1999
Prostate Cancer	Drug: paclitaxel|Drug: vinorelbine ditartrate	Phase II	1999
Prostate Cancer	Drug: exatecan mesylate	Phase II	1999
Prostate Cancer	Drug: bromodeoxyuridine|Procedure: conventional surgery|Procedure: fluorescent antibody technique	Phase II	1999
Prostate Cancer	Drug: arsenic trioxide	Phase II	1999
Prostate Cancer	Drug: MUC-2-KLH vaccine|Drug: QS21	Phase II	1999
Prostate Cancer	Drug: recombinant fowlpox-prostate apecific antigen vaccine|Drug: recombinant vaccinia prostate-specific antigen vaccine	Phase II	2000
Prostate Cancer	Drug: soy protein isolate	Phase II	2000
Prostate Cancer	Drug: carboplatin|Drug: docetaxel|Drug: estramustine phosphate sodium|Drug: filgrastim	Phase II	2000
Prostate Cancer	Drug: tipifarnib|Procedure: chemotherapy	Phase II	2000
Prostate Cancer	Drug: bryostatin 1|Drug: paclitaxel	Phase II	2000
[truncated: 456 more rows]
