# Supplementary material for: Cancer-Drug Associations: A Complex System
Source: PubMed Central journal article supplement (PMC2848862; doi:10.1371/journal.pone.0010031), 2010-04-02

A

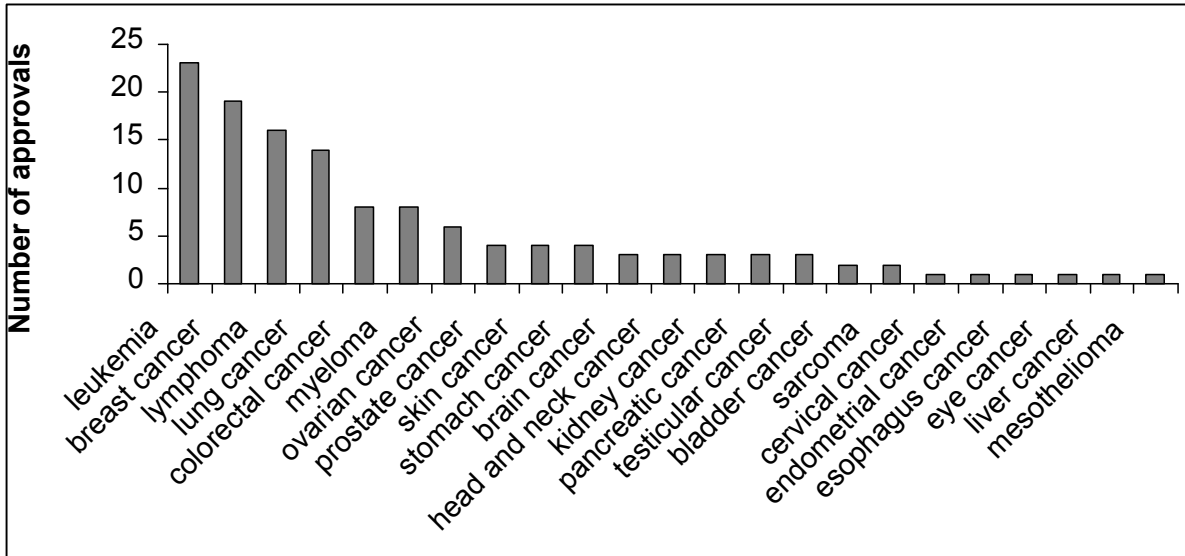

B

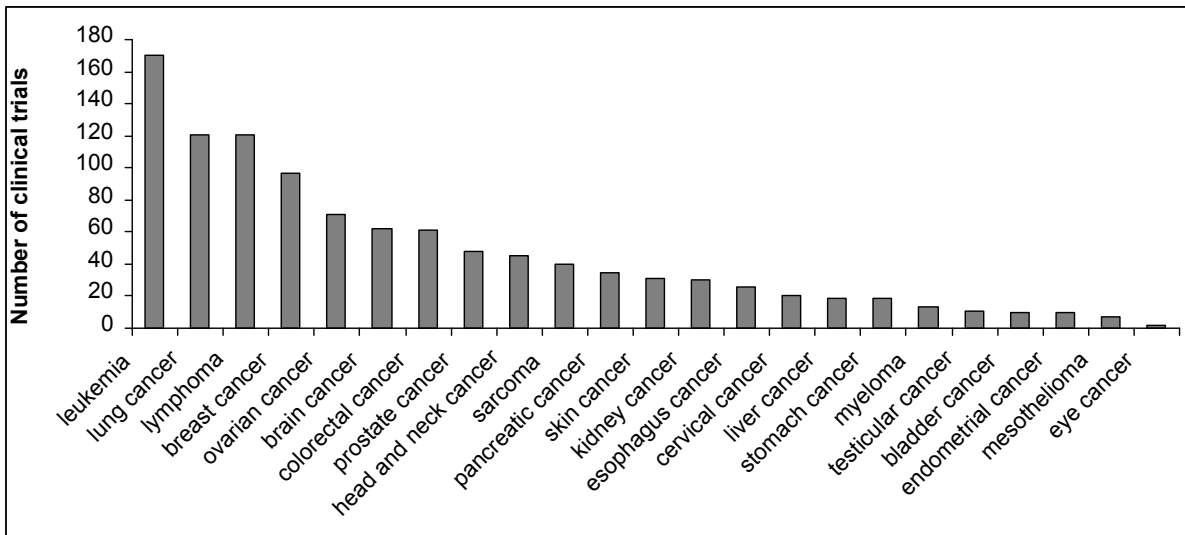

Supplement: pone.0010031.s002.pdf [file pone.0010031.s002.pdf]
